# Supplementary material
Source: PubMed Central journal article supplement (PMC11422873)
Supplement: media-1.pdf [file media-1.pdf]

Appendix 1-table 1. Assay outputs for CellTag experiments.

| CellTag number | Experiment 1 |        |            |        | Experiment 2 |        |            |        | Experiment 3 |        |            |        | Proportion |        |                    |        |
|----------------|--------------|--------|------------|--------|--------------|--------|------------|--------|--------------|--------|------------|--------|------------|--------|--------------------|--------|
|                | Read count   |        | Proportion |        | Read count   |        | Proportion |        | Read count   |        | Proportion |        | Mean       |        | Standard deviation |        |
|                | Day 9        | Day 45 | Day 9      | Day 45 | Day 9        | Day 45 | Day 9      | Day 45 | Day 9        | Day 45 | Day 9      | Day 45 | Day 9      | Day 45 | Day 9              | Day 45 |
| CellTag1       | 18886        | 7358   | 4.68       | 4.40   | 9135         | 7518   | 4.49       | 4.24   | 9860         | 6608   | 4.38       | 4.42   | 4.52       | 4.35   | 0.15               | 0.10   |
| CellTag2       | 22571        | 9930   | 5.60       | 5.93   | 11498        | 10239  | 5.65       | 5.78   | 12373        | 8001   | 5.50       | 5.35   | 5.58       | 5.69   | 0.08               | 0.30   |
| CellTag3       | 18731        | 8318   | 4.65       | 4.97   | 9439         | 9057   | 4.64       | 5.11   | 11058        | 7363   | 4.91       | 4.93   | 4.73       | 5.00   | 0.16               | 0.10   |
| CellTag4       | 25031        | 10273  | 6.21       | 6.14   | 13022        | 10865  | 6.40       | 6.13   | 13515        | 9318   | 6.00       | 6.24   | 6.20       | 6.17   | 0.20               | 0.06   |
| CellTag5       | 18034        | 8229   | 4.47       | 4.92   | 9654         | 8455   | 4.74       | 4.77   | 10665        | 6944   | 4.74       | 4.65   | 4.65       | 4.78   | 0.15               | 0.13   |
| CellTag6       | 21130        | 8923   | 5.24       | 5.33   | 10702        | 9912   | 5.26       | 5.60   | 12738        | 8179   | 5.66       | 5.47   | 5.39       | 5.47   | 0.24               | 0.13   |
| CellTag7       | 17421        | 8023   | 4.32       | 4.79   | 9086         | 8475   | 4.46       | 4.79   | 9867         | 7113   | 4.38       | 4.76   | 4.39       | 4.78   | 0.07               | 0.02   |
| CellTag8       | 19780        | 8156   | 4.91       | 4.87   | 9708         | 8955   | 4.77       | 5.06   | 11174        | 7404   | 4.96       | 4.95   | 4.88       | 4.96   | 0.10               | 0.09   |
| CellTag9       | 20872        | 8931   | 5.18       | 5.33   | 10628        | 9194   | 5.22       | 5.19   | 11859        | 7849   | 5.27       | 5.25   | 5.22       | 5.26   | 0.05               | 0.07   |
| CellTag10      | 19441        | 7610   | 4.82       | 4.55   | 10308        | 7461   | 5.07       | 4.21   | 10458        | 7297   | 4.65       | 4.88   | 4.84       | 4.55   | 0.21               | 0.34   |
| CellTag11      | 24278        | 10397  | 6.02       | 6.21   | 12258        | 11333  | 6.02       | 6.40   | 14086        | 9108   | 6.26       | 6.09   | 6.10       | 6.23   | 0.14               | 0.15   |
| CellTag12      | 26268        | 11069  | 6.52       | 6.61   | 13209        | 11494  | 6.49       | 6.49   | 14782        | 9871   | 6.57       | 6.61   | 6.52       | 6.57   | 0.04               | 0.07   |
| CellTag13      | 18378        | 7440   | 4.56       | 4.44   | 8926         | 8197   | 4.39       | 4.63   | 9626         | 6363   | 4.28       | 4.26   | 4.41       | 4.44   | 0.14               | 0.19   |
| CellTag14      | 26288        | 9801   | 6.52       | 5.85   | 12418        | 11095  | 6.10       | 6.26   | 14185        | 8737   | 6.30       | 5.85   | 6.31       | 5.99   | 0.21               | 0.24   |
| CellTag15      | 23881        | 9917   | 5.92       | 5.92   | 12073        | 11203  | 5.93       | 6.33   | 13775        | 8986   | 6.12       | 6.01   | 5.99       | 6.09   | 0.11               | 0.21   |
| CellTag16      | 15131        | 6019   | 3.75       | 3.60   | 7421         | 6208   | 3.65       | 3.51   | 8175         | 5532   | 3.63       | 3.70   | 3.68       | 3.60   | 0.07               | 0.10   |
| CellTag17      | 5094         | 1861   | 1.26       | 1.11   | 2598         | 1787   | 1.28       | 1.01   | 2788         | 1607   | 1.24       | 1.08   | 1.26       | 1.07   | 0.02               | 0.05   |
| CellTag18      | 25447        | 10259  | 6.31       | 6.13   | 12235        | 10417  | 6.01       | 5.88   | 13537        | 9539   | 6.01       | 6.38   | 6.11       | 6.13   | 0.17               | 0.25   |
| CellTag19      | 25280        | 10523  | 6.27       | 6.29   | 13419        | 10627  | 6.59       | 6.00   | 14407        | 9221   | 6.40       | 6.17   | 6.42       | 6.15   | 0.16               | 0.14   |
| CellTag20      | 11225        | 4371   | 2.78       | 2.61   | 5774         | 4611   | 2.84       | 2.60   | 6170         | 4396   | 2.74       | 2.94   | 2.79       | 2.72   | 0.05               | 0.19   |
