# Supplementary material
Source: PubMed Central journal article supplement (PMC11422873)
Supplement: media-3.pdf [file media-3.pdf]

Appendix 1-table 3. Proportion of each variant in residues R24, H66, and A127.

| Residue | Variant     | ACMG Guidline Classification | Percent (%)               |             | Read count                |             |
|---------|-------------|------------------------------|---------------------------|-------------|---------------------------|-------------|
|         |             |                              | Amplified plasmid library | Day 9 cells | Amplified plasmid library | Day 9 cells |
| 24      | p.Arg24Asn  | VUS                          | 4.56                      | 4.34        | 8516                      | 4567        |
| 24      | p.Arg24Lys  | VUS                          | 5.15                      | 4.81        | 9629                      | 5056        |
| 24      | p.Arg24Thr  | VUS                          | 4.42                      | 4.18        | 8250                      | 4398        |
| 24      | p.Arg24Arg  | Synonymous                   | 4.92                      | 6.32        | 9196                      | 6651        |
| 24      | p.Arg24Ser  | VUS                          | 5.09                      | 5.00        | 9504                      | 5259        |
| 24      | p.Arg24Ile  | VUS                          | 4.02                      | 4.13        | 7503                      | 4338        |
| 24      | p.Arg24Met  | VUS                          | 4.84                      | 5.22        | 9048                      | 5493        |
| 24      | p.Arg24His  | VUS                          | 5.24                      | 5.07        | 9788                      | 5328        |
| 24      | p.Arg24Gln  | VUS                          | 5.64                      | 5.29        | 10542                     | 5563        |
| 24      | p.Arg24Pro  | Pathogenic                   | 3.64                      | 3.79        | 6803                      | 3981        |
| 24      | p.Arg24Leu  | VUS                          | 4.45                      | 4.32        | 8319                      | 4538        |
| 24      | p.Arg24Asp  | VUS                          | 7.13                      | 6.91        | 13323                     | 7271        |
| 24      | p.Arg24Glu  | VUS                          | 5.19                      | 5.09        | 9692                      | 5349        |
| 24      | p.Arg24Ala  | VUS                          | 4.52                      | 4.28        | 8447                      | 4498        |
| 24      | p.Arg24Gly  | VUS                          | 4.06                      | 4.01        | 7595                      | 4217        |
| 24      | p.Arg24Val  | VUS                          | 6.48                      | 6.42        | 12100                     | 6754        |
| 24      | p.Arg24Tyr  | VUS                          | 4.58                      | 4.56        | 8553                      | 4797        |
| 24      | p.Arg24Cys  | VUS                          | 4.48                      | 4.40        | 8366                      | 4627        |
| 24      | p.Arg24Trp  | VUS                          | 6.23                      | 6.65        | 11641                     | 6995        |
| 24      | p.Arg24Phe  | VUS                          | 5.38                      | 5.21        | 10044                     | 5482        |
| 66      | p.His66Asn  | VUS                          | 4.71                      | 3.52        | 5574                      | 1413        |
| 66      | p.His66Lys  | VUS                          | 5.85                      | 4.48        | 6935                      | 1796        |
| 66      | p.His66Thr  | VUS                          | 4.70                      | 3.60        | 5573                      | 1442        |
| 66      | p.His66Arg  | VUS                          | 5.25                      | 4.85        | 6216                      | 1944        |
| 66      | p.His66Ser  | VUS                          | 5.10                      | 4.57        | 6038                      | 1831        |
| 66      | p.His66Ile  | VUS                          | 4.83                      | 5.04        | 5726                      | 2019        |
| 66      | p.His66Met  | VUS                          | 5.30                      | 3.81        | 6278                      | 1527        |
| 66      | p.His66His  | Synonymous                   | 3.88                      | 4.94        | 4591                      | 1982        |
| 66      | p.His66Gln  | VUS                          | 5.28                      | 8.89        | 6250                      | 3565        |
| 66      | p.His66Pro  | VUS                          | 6.13                      | 6.07        | 7260                      | 2432        |
| 66      | p.His66Leu  | VUS                          | 5.55                      | 5.83        | 6575                      | 2338        |
| 66      | p.His66Asp  | VUS                          | 2.77                      | 2.92        | 3286                      | 1169        |
| 66      | p.His66Glu  | VUS                          | 6.10                      | 6.04        | 7229                      | 2420        |
| 66      | p.His66Ala  | VUS                          | 5.41                      | 5.95        | 6414                      | 2387        |
| 66      | p.His66Gly  | VUS                          | 5.56                      | 5.24        | 6587                      | 2100        |
| 66      | p.His66Val  | VUS                          | 4.58                      | 4.47        | 5430                      | 1793        |
| 66      | p.His66Tyr  | VUS                          | 4.55                      | 4.66        | 5384                      | 1869        |
| 66      | p.His66Cys  | VUS                          | 4.53                      | 4.63        | 5367                      | 1856        |
| 66      | p.His66Trp  | VUS                          | 5.40                      | 5.55        | 6397                      | 2225        |
| 66      | p.His66Phe  | VUS                          | 4.51                      | 4.94        | 5346                      | 1981        |
| 127     | p.Alal27Asn | Benign                       | 4.62                      | 4.37        | 3844                      | 6274        |
| 127     | p.Alal27Lys | VUS                          | 4.37                      | 4.36        | 3631                      | 6261        |
| 127     | p.Alal27Thr | VUS                          | 4.44                      | 3.99        | 3693                      | 5737        |
| 127     | p.Alal27Arg | VUS                          | 5.85                      | 5.79        | 4862                      | 8321        |
| 127     | p.Alal27Ser | VUS                          | 4.95                      | 5.38        | 4117                      | 7732        |
| 127     | p.Alal27Ile | VUS                          | 4.81                      | 4.92        | 4000                      | 7070        |
| 127     | p.Alal27Met | VUS                          | 5.79                      | 6.01        | 4818                      | 8638        |
| 127     | p.Alal27His | VUS                          | 4.24                      | 4.31        | 3529                      | 6189        |
| 127     | p.Alal27Gln | VUS                          | 5.09                      | 5.50        | 4233                      | 7900        |
| 127     | p.Alal27Pro | VUS                          | 2.84                      | 2.63        | 2364                      | 3778        |
| 127     | p.Alal27Leu | VUS                          | 5.06                      | 4.74        | 4209                      | 6805        |
| 127     | p.Alal27Asp | VUS                          | 6.04                      | 6.53        | 5023                      | 9386        |
| 127     | p.Alal27Glu | VUS                          | 6.07                      | 5.60        | 5052                      | 8045        |
| 127     | p.Alal27Ala | Synonymous                   | 4.27                      | 3.68        | 3548                      | 5292        |
| 127     | p.Alal27Gly | VUS                          | 4.75                      | 4.74        | 3949                      | 6809        |
| 127     | p.Alal27Val | VUS                          | 6.33                      | 6.83        | 5268                      | 9821        |
| 127     | p.Alal27Tyr | VUS                          | 4.33                      | 3.86        | 3599                      | 5544        |
| 127     | p.Alal27Cys | VUS                          | 4.44                      | 4.93        | 3696                      | 7087        |
| 127     | p.Alal27Trp | VUS                          | 5.97                      | 5.92        | 4962                      | 8513        |
| 127     | p.Alal27Phe | VUS                          | 5.73                      | 5.92        | 4767                      | 8512        |
