# Supplementary material
Source: PubMed Central journal article supplement (PMC11422873)
Supplement: media-5.pdf [file media-5.pdf]

**Appendix 1-table 5. Day of confluency by experiment and residue.**

| <b>Residue</b> | <b>Exp 1</b> | <b>Exp 2</b> |
|----------------|--------------|--------------|
| 1              | 32           |              |
| 2              | 31           |              |
| 3              | 33           |              |
| 4              | 31           |              |
| 5              | 29           |              |
| 6              | 29           |              |
| 7              | 33           |              |
| 8              | 29           |              |
| 9              | 25           |              |
| 10             | 29           |              |
| 11             | 25           |              |
| 12             | 34           |              |
| 13             | 33           |              |
| 14             | 32           |              |
| 15             | 29           | 30           |
| 16             | 21           |              |
| 17             | 23           |              |
| 18             | 29           |              |
| 19             | 30           |              |
| 20             | 23           | 17           |
| 21             | 17           |              |
| 22             | 29           |              |
| 23             | 23           |              |
| 24             | 27           | 25           |
| 25             | 30           |              |
| 26             | 33           |              |
| 27             | 31           | 30           |
| 28             | 22           |              |
| 29             | 29           |              |
| 30             | 27           |              |
| 31             | 29           |              |
| 32             | 16           | 20           |
| 33             | 33           |              |
| 34             | 34           | 30           |
| 35             | 25           | 25           |
| 36             | 28           |              |
| 37             | 30           |              |
| 38             | 22           |              |
| 39             | 24           |              |
| 40             | 28           |              |
| 41             | 30           |              |
| 42             | 20           |              |
| 43             | 30           |              |
| 44             | 32           |              |
| 45             | 31           | 30           |
| 46             | 27           |              |
| 47             | 31           |              |
| 48             | 16           |              |
| 49             | 23           |              |

|     |    |    |
|-----|----|----|
| 50  | 22 |    |
| 51  | 23 |    |
| 52  | 30 |    |
| 53  | 25 |    |
| 54  | 33 |    |
| 55  | 21 |    |
| 56  | 27 |    |
| 57  | 30 | 31 |
| 58  | 27 |    |
| 59  | 21 |    |
| 60  | 21 |    |
| 61  | 28 |    |
| 62  | 33 | 33 |
| 63  | 20 |    |
| 64  | 28 |    |
| 65  | 23 |    |
| 66  | 23 |    |
| 67  | 27 |    |
| 68  | 20 |    |
| 69  | 31 |    |
| 70  | 26 |    |
| 71  | 20 |    |
| 72  | 29 | 28 |
| 73  | 27 | 29 |
| 74  | 21 | 23 |
| 75  | 27 | 28 |
| 76  | 27 |    |
| 77  | 28 |    |
| 78  | 30 |    |
| 79  | 29 |    |
| 80  | 27 |    |
| 81  | 20 |    |
| 82  | 23 |    |
| 83  | 20 |    |
| 84  | 23 |    |
| 85  | 30 |    |
| 86  | 20 |    |
| 87  | 22 |    |
| 88  | 29 |    |
| 89  | 19 |    |
| 90  | 28 |    |
| 91  | 28 |    |
| 92  | 30 |    |
| 93  | 25 |    |
| 94  | 21 |    |
| 95  | 34 |    |
| 96  | 34 | 30 |
| 97  | 22 |    |
| 98  | 30 |    |
| 99  | 27 |    |
| 100 | 23 |    |
| 101 | 23 |    |
| 102 | 20 |    |
| 103 | 29 |    |

|     |    |    |
|-----|----|----|
| 104 | 28 |    |
| 105 | 27 |    |
| 106 | 30 | 28 |
| 107 | 33 | 30 |
| 108 | 18 |    |
| 109 | 28 | 30 |
| 110 | 38 |    |
| 111 | 24 |    |
| 112 | 27 |    |
| 113 | 38 | 35 |
| 114 | 17 |    |
| 115 | 33 |    |
| 116 | 32 |    |
| 117 | 30 |    |
| 118 | 35 |    |
| 119 | 38 |    |
| 120 | 29 | 30 |
| 121 | 28 |    |
| 122 | 27 | 27 |
| 123 | 29 | 27 |
| 124 | 30 | 30 |
| 125 | 32 | 30 |
| 126 | 23 |    |
| 127 | 30 |    |
| 128 | 29 |    |
| 129 | 30 |    |
| 130 | 25 |    |
| 131 | 31 |    |
| 132 | 30 |    |
| 133 | 38 |    |
| 134 | 32 | 28 |
| 135 | 38 |    |
| 136 | 40 | 35 |
| 137 | 40 |    |
| 138 | 40 |    |
| 139 | 32 | 30 |
| 140 | 35 |    |
| 141 | 33 |    |
| 142 | 30 |    |
| 143 | 32 |    |
| 144 | 31 |    |
| 145 | 30 |    |
| 146 | 35 |    |
| 147 | 29 |    |
| 148 | 31 |    |
| 149 | 30 |    |
| 150 | 31 |    |
| 151 | 32 |    |
| 152 | 29 |    |
| 153 | 31 | 28 |
| 154 | 30 |    |
| 155 | 32 |    |
| 156 | 30 |    |

---
