# Supplementary material
Source: PubMed Central journal article supplement (PMC11422873)
Supplement: media-6.pdf [file media-6.pdf]

Appendix 1-table 6. Normalized fold change for all possible *CDKN2A* missense and synonymous variants.

| Residue | Variant   | Normalized fold change_1 | Log2 normalized fold change_1 | Classification_1 | Normalized fold change_2 | Log2 normalized fold change_2 | Classification_2 | Mean of normalized fold change | Mean of log normalized fold change | Classification_merged |
|---------|-----------|--------------------------|-------------------------------|------------------|--------------------------|-------------------------------|------------------|--------------------------------|------------------------------------|-----------------------|
| 1       | p.Met1Asn | 0.92                     | -0.12                         | Neutral          |                          |                               |                  | 0.92                           | -0.12                              | Neutral               |
| 1       | p.Met1Lys | 0.82                     | -0.29                         | Neutral          |                          |                               |                  | 0.82                           | -0.29                              | Neutral               |
| 1       | p.Met1Thr | 0.94                     | -0.09                         | Neutral          |                          |                               |                  | 0.94                           | -0.09                              | Neutral               |
| 1       | p.Met1Arg | 0.79                     | -0.33                         | Neutral          |                          |                               |                  | 0.79                           | -0.33                              | Neutral               |
| 1       | p.Met1Ser | 0.92                     | -0.12                         | Neutral          |                          |                               |                  | 0.92                           | -0.12                              | Neutral               |
| 1       | p.Met1Ile | 0.92                     | -0.12                         | Neutral          |                          |                               |                  | 0.92                           | -0.12                              | Neutral               |
| 1       | p.Met1Met | 1.00                     | 0.00                          | Neutral          |                          |                               |                  | 1.00                           | 0.00                               | Neutral               |
| 1       | p.Met1His | 1.01                     | 0.02                          | Neutral          |                          |                               |                  | 1.01                           | 0.02                               | Neutral               |
| 1       | p.Met1Gln | 0.96                     | -0.05                         | Neutral          |                          |                               |                  | 0.96                           | -0.05                              | Neutral               |
| 1       | p.Met1Pro | 0.87                     | -0.20                         | Neutral          |                          |                               |                  | 0.87                           | -0.20                              | Neutral               |
| 1       | p.Met1Leu | 0.96                     | -0.06                         | Neutral          |                          |                               |                  | 0.96                           | -0.06                              | Neutral               |
| 1       | p.Met1Asp | 0.86                     | -0.22                         | Neutral          |                          |                               |                  | 0.86                           | -0.22                              | Neutral               |
| 1       | p.Met1Glu | 0.97                     | -0.04                         | Neutral          |                          |                               |                  | 0.97                           | -0.04                              | Neutral               |
| 1       | p.Met1Ala | 0.90                     | -0.16                         | Neutral          |                          |                               |                  | 0.90                           | -0.16                              | Neutral               |
| 1       | p.Met1Gly | 0.94                     | -0.09                         | Neutral          |                          |                               |                  | 0.94                           | -0.09                              | Neutral               |
| 1       | p.Met1Val | 1.61                     | 0.69                          | Indeterminate    |                          |                               |                  | 1.61                           | 0.69                               | Indeterminate         |
| 1       | p.Met1Tyr | 0.92                     | -0.13                         | Neutral          |                          |                               |                  | 0.92                           | -0.13                              | Neutral               |
| 1       | p.Met1Cys | 0.90                     | -0.15                         | Neutral          |                          |                               |                  | 0.90                           | -0.15                              | Neutral               |
| 1       | p.Met1Trp | 0.92                     | -0.12                         | Neutral          |                          |                               |                  | 0.92                           | -0.12                              | Neutral               |
| 1       | p.Met1Phe | 0.97                     | -0.04                         | Neutral          |                          |                               |                  | 0.97                           | -0.04                              | Neutral               |
| 2       | p.Glu2Asn | 0.20                     | -2.29                         | Neutral          |                          |                               |                  | 0.20                           | -2.29                              | Neutral               |
| 2       | p.Glu2Lys | 0.39                     | -1.35                         | Neutral          |                          |                               |                  | 0.39                           | -1.35                              | Neutral               |
| 2       | p.Glu2Thr | 0.41                     | -1.27                         | Neutral          |                          |                               |                  | 0.41                           | -1.27                              | Neutral               |
| 2       | p.Glu2Arg | 0.21                     | -2.22                         | Neutral          |                          |                               |                  | 0.21                           | -2.22                              | Neutral               |
| 2       | p.Glu2Ser | 0.64                     | -0.65                         | Neutral          |                          |                               |                  | 0.64                           | -0.65                              | Neutral               |
| 2       | p.Glu2Ile | 0.24                     | -2.03                         | Neutral          |                          |                               |                  | 0.24                           | -2.03                              | Neutral               |
| 2       | p.Glu2Met | 0.57                     | -0.81                         | Neutral          |                          |                               |                  | 0.57                           | -0.81                              | Neutral               |
| 2       | p.Glu2His | 0.40                     | -1.34                         | Neutral          |                          |                               |                  | 0.40                           | -1.34                              | Neutral               |
| 2       | p.Glu2Gln | 0.27                     | -1.90                         | Neutral          |                          |                               |                  | 0.27                           | -1.90                              | Neutral               |
| 2       | p.Glu2Pro | 0.31                     | -1.70                         | Neutral          |                          |                               |                  | 0.31                           | -1.70                              | Neutral               |
| 2       | p.Glu2Leu | 0.25                     | -2.02                         | Neutral          |                          |                               |                  | 0.25                           | -2.02                              | Neutral               |
| 2       | p.Glu2Asp | 0.15                     | -2.75                         | Neutral          |                          |                               |                  | 0.15                           | -2.75                              | Neutral               |
| 2       | p.Glu2Glu | 1.00                     | 0.00                          | Neutral          |                          |                               |                  | 1.00                           | 0.00                               | Neutral               |
| 2       | p.Glu2Ala | 0.61                     | -0.71                         | Neutral          |                          |                               |                  | 0.61                           | -0.71                              | Neutral               |
| 2       | p.Glu2Gly | 0.36                     | -1.49                         | Neutral          |                          |                               |                  | 0.36                           | -1.49                              | Neutral               |
| 2       | p.Glu2Val | 0.23                     | -2.10                         | Neutral          |                          |                               |                  | 0.23                           | -2.10                              | Neutral               |
| 2       | p.Glu2Tyr | 0.31                     | -1.69                         | Neutral          |                          |                               |                  | 0.31                           | -1.69                              | Neutral               |
| 2       | p.Glu2Cys | 0.64                     | -0.64                         | Neutral          |                          |                               |                  | 0.64                           | -0.64                              | Neutral               |
| 2       | p.Glu2Trp | 0.44                     | -1.18                         | Neutral          |                          |                               |                  | 0.44                           | -1.18                              | Neutral               |
| 2       | p.Glu2Phe | 0.38                     | -1.38                         | Neutral          |                          |                               |                  | 0.38                           | -1.38                              | Neutral               |
| 3       | p.Pro3Asn | 1.38                     | 0.46                          | Indeterminate    |                          |                               |                  | 1.38                           | 0.46                               | Indeterminate         |
| 3       | p.Pro3Lys | 1.48                     | 0.57                          | Indeterminate    |                          |                               |                  | 1.48                           | 0.57                               | Indeterminate         |
| 3       | p.Pro3Thr | 1.39                     | 0.48                          | Indeterminate    |                          |                               |                  | 1.39                           | 0.48                               | Indeterminate         |
| 3       | p.Pro3Arg | 2.22                     | 1.15                          | Deleterious      |                          |                               |                  | 2.22                           | 1.15                               | Deleterious           |
| 3       | p.Pro3Ser | 1.71                     | 0.78                          | Indeterminate    |                          |                               |                  | 1.71                           | 0.78                               | Indeterminate         |
| 3       | p.Pro3Ile | 1.33                     | 0.41                          | Indeterminate    |                          |                               |                  | 1.33                           | 0.41                               | Indeterminate         |
| 3       | p.Pro3Met | 1.69                     | 0.76                          | Indeterminate    |                          |                               |                  | 1.69                           | 0.76                               | Indeterminate         |
| 3       | p.Pro3His | 1.08                     | 0.11                          | Neutral          |                          |                               |                  | 1.08                           | 0.11                               | Neutral               |
| 3       | p.Pro3Gln | 0.74                     | -0.44                         | Neutral          |                          |                               |                  | 0.74                           | -0.44                              | Neutral               |
| 3       | p.Pro3Pro | 1.00                     | 0.00                          | Neutral          |                          |                               |                  | 1.00                           | 0.00                               | Neutral               |
| 3       | p.Pro3Leu | 1.52                     | 0.60                          | Indeterminate    |                          |                               |                  | 1.52                           | 0.60                               | Indeterminate         |
| 3       | p.Pro3Asp | 1.68                     | 0.75                          | Indeterminate    |                          |                               |                  | 1.68                           | 0.75                               | Indeterminate         |
| 3       | p.Pro3Glu | 1.15                     | 0.20                          | Neutral          |                          |                               |                  | 1.15                           | 0.20                               | Neutral               |
| 3       | p.Pro3Ala | 1.06                     | 0.09                          | Neutral          |                          |                               |                  | 1.06                           | 0.09                               | Neutral               |
| 3       | p.Pro3Gly | 2.75                     | 1.46                          | Deleterious      |                          |                               |                  | 2.75                           | 1.46                               | Deleterious           |
| 3       | p.Pro3Val | 1.71                     | 0.77                          | Indeterminate    |                          |                               |                  | 1.71                           | 0.77                               | Indeterminate         |
| 3       | p.Pro3Tyr | 1.18                     | 0.23                          | Neutral          |                          |                               |                  | 1.18                           | 0.23                               | Neutral               |
| 3       | p.Pro3Cys | 1.49                     | 0.58                          | Indeterminate    |                          |                               |                  | 1.49                           | 0.58                               | Indeterminate         |
| 3       | p.Pro3Trp | 1.94                     | 0.96                          | Indeterminate    |                          |                               |                  | 1.94                           | 0.96                               | Indeterminate         |
| 3       | p.Pro3Phe | 1.69                     | 0.76                          | Indeterminate    |                          |                               |                  | 1.69                           | 0.76                               | Indeterminate         |
| 4       | p.Ala4Asn | 1.36                     | 0.44                          | Indeterminate    |                          |                               |                  | 1.36                           | 0.44                               | Indeterminate         |
| 4       | p.Ala4Lys | 0.98                     | -0.02                         | Neutral          |                          |                               |                  | 0.98                           | -0.02                              | Neutral               |
| 4       | p.Ala4Thr | 2.78                     | 1.48                          | Deleterious      |                          |                               |                  | 2.78                           | 1.48                               | Deleterious           |
| 4       | p.Ala4Arg | 1.07                     | 0.10                          | Neutral          |                          |                               |                  | 1.07                           | 0.10                               | Neutral               |
| 4       | p.Ala4Ser | 2.88                     | 1.53                          | Deleterious      |                          |                               |                  | 2.88                           | 1.53                               | Deleterious           |
| 4       | p.Ala4Ile | 0.76                     | -0.40                         | Neutral          |                          |                               |                  | 0.76                           | -0.40                              | Neutral               |
| 4       | p.Ala4Met | 1.45                     | 0.54                          | Indeterminate    |                          |                               |                  | 1.45                           | 0.54                               | Indeterminate         |
| 4       | p.Ala4His | 1.16                     | 0.21                          | Neutral          |                          |                               |                  | 1.16                           | 0.21                               | Neutral               |
| 4       | p.Ala4Gln | 0.77                     | -0.37                         | Neutral          |                          |                               |                  | 0.77                           | -0.37                              | Neutral               |
| 4       | p.Ala4Pro | 0.84                     | -0.25                         | Neutral          |                          |                               |                  | 0.84                           | -0.25                              | Neutral               |
| 4       | p.Ala4Leu | 0.96                     | -0.06                         | Neutral          |                          |                               |                  | 0.96                           | -0.06                              | Neutral               |
| 4       | p.Ala4Asp | 1.10                     | 0.13                          | Neutral          |                          |                               |                  | 1.10                           | 0.13                               | Neutral               |
| 4       | p.Ala4Glu | 0.65                     | -0.63                         | Neutral          |                          |                               |                  | 0.65                           | -0.63                              | Neutral               |
| 4       | p.Ala4Ala | 1.00                     | 0.00                          | Neutral          |                          |                               |                  | 1.00                           | 0.00                               | Neutral               |
| 4       | p.Ala4Gly | 1.34                     | 0.42                          | Indeterminate    |                          |                               |                  | 1.34                           | 0.42                               | Indeterminate         |
| 4       | p.Ala4Val | 0.78                     | -0.36                         | Neutral          |                          |                               |                  | 0.78                           | -0.36                              | Neutral               |
| 4       | p.Ala4Tyr | 0.90                     | -0.15                         | Neutral          |                          |                               |                  | 0.90                           | -0.15                              | Neutral               |
| 4       | p.Ala4Cys | 2.08                     | 1.06                          | Indeterminate    |                          |                               |                  | 2.08                           | 1.06                               | Indeterminate         |
| 4       | p.Ala4Trp | 1.12                     | 0.16                          | Neutral          |                          |                               |                  | 1.12                           | 0.16                               | Neutral               |
| 4       | p.Ala4Phe | 1.42                     | 0.51                          | Indeterminate    |                          |                               |                  | 1.42                           | 0.51                               | Indeterminate         |
| 5       | p.Ala5Asn | 0.80                     | -0.32                         | Neutral          |                          |                               |                  | 0.80                           | -0.32                              | Neutral               |
| 5       | p.Ala5Lys | 0.37                     | -1.44                         | Neutral          |                          |                               |                  | 0.37                           | -1.44                              | Neutral               |
| 5       | p.Ala5Thr | 1.04                     | 0.05                          | Neutral          |                          |                               |                  | 1.04                           | 0.05                               | Neutral               |
| 5       | p.Ala5Arg | 0.57                     | -0.81                         | Neutral          |                          |                               |                  | 0.57                           | -0.81                              | Neutral               |
| 5       | p.Ala5Ser | 2.86                     | 1.52                          | Deleterious      |                          |                               |                  | 2.86                           | 1.52                               | Deleterious           |
| 5       | p.Ala5Ile | 0.31                     | -1.68                         | Neutral          |                          |                               |                  | 0.31                           | -1.68                              | Neutral               |
| 5       | p.Ala5Met | 0.87                     | -0.21                         | Neutral          |                          |                               |                  | 0.87                           | -0.21                              | Neutral               |
| 5       | p.Ala5His | 1.10                     | 0.14                          | Neutral          |                          |                               |                  | 1.10                           | 0.14                               | Neutral               |
| 5       | p.Ala5Gln | 1.11                     | 0.15                          | Neutral          |                          |                               |                  | 1.11                           | 0.15                               | Neutral               |
| 5       | p.Ala5Pro | 0.86                     | -0.21                         | Neutral          |                          |                               |                  | 0.86                           | -0.21                              | Neutral               |
| 5       | p.Ala5Leu | 1.88                     | 0.91                          | Indeterminate    |                          |                               |                  | 1.88                           | 0.91                               | Indeterminate         |
| 5       | p.Ala5Asp | 1.14                     | 0.19                          | Neutral          |                          |                               |                  | 1.14                           | 0.19                               | Neutral               |
| 5       | p.Ala5Glu | 1.37                     | 0.46                          | Indeterminate    |                          |                               |                  | 1.37                           | 0.46                               | Indeterminate         |
| 5       | p.Ala5Ala | 1.00                     | 0.00                          | Neutral          |                          |                               |                  | 1.00                           | 0.00                               | Neutral               |
| 5       | p.Ala5Gly | 0.77                     | -0.38                         | Neutral          |                          |                               |                  | 0.77                           | -0.38                              | Neutral               |
| 5       | p.Ala5Val | 0.89                     | -0.17                         | Neutral          |                          |                               |                  | 0.89                           | -0.17                              | Neutral               |
| 5       | p.Ala5Tyr | 4.82                     | 2.27                          | Deleterious      |                          |                               |                  | 4.82                           | 2.27                               | Deleterious           |
| 5       | p.Ala5Cys | 1.26                     | 0.34                          | Indeterminate    |                          |                               |                  | 1.26                           | 0.34                               | Indeterminate         |
| 5       | p.Ala5Trp | 2.44                     | 1.29                          | Deleterious      |                          |                               |                  | 2.44                           | 1.29                               | Deleterious           |
| 5       | p.Ala5Phe | 0.90                     | -0.16                         | Neutral          |                          |                               |                  | 0.90                           | -0.16                              | Neutral               |
| 6       | p.Gly6Asn | 0.95                     | -0.07                         | Neutral          |                          |                               |                  | 0.95                           | -0.07                              | Neutral               |

|    |            |      |       |               |      |       |               |
|----|------------|------|-------|---------------|------|-------|---------------|
| 6  | p.Gly6Lys  | 1.40 | 0.48  | Indeterminate | 1.40 | 0.48  | Indeterminate |
| 6  | p.Gly6Thr  | 1.47 | 0.56  | Indeterminate | 1.47 | 0.56  | Indeterminate |
| 6  | p.Gly6Arg  | 4.48 | 2.16  | Deleterious   | 4.48 | 2.16  | Deleterious   |
| 6  | p.Gly6Ser  | 3.45 | 1.79  | Deleterious   | 3.45 | 1.79  | Deleterious   |
| 6  | p.Gly6Ile  | 3.76 | 1.91  | Deleterious   | 3.76 | 1.91  | Deleterious   |
| 6  | p.Gly6Met  | 3.51 | 1.81  | Deleterious   | 3.51 | 1.81  | Deleterious   |
| 6  | p.Gly6His  | 0.72 | -0.48 | Neutral       | 0.72 | -0.48 | Neutral       |
| 6  | p.Gly6Gln  | 0.87 | -0.20 | Neutral       | 0.87 | -0.20 | Neutral       |
| 6  | p.Gly6Pro  | 2.07 | 1.05  | Indeterminate | 2.07 | 1.05  | Indeterminate |
| 6  | p.Gly6Leu  | 1.24 | 0.32  | Indeterminate | 1.24 | 0.32  | Indeterminate |
| 6  | p.Gly6Asp  | 1.04 | 0.06  | Neutral       | 1.04 | 0.06  | Neutral       |
| 6  | p.Gly6Glu  | 1.16 | 0.22  | Neutral       | 1.16 | 0.22  | Neutral       |
| 6  | p.Gly6Ala  | 1.05 | 0.07  | Neutral       | 1.05 | 0.07  | Neutral       |
| 6  | p.Gly6Gly  | 1.00 | 0.00  | Neutral       | 1.00 | 0.00  | Neutral       |
| 6  | p.Gly6Val  | 1.00 | 0.00  | Neutral       | 1.00 | 0.00  | Neutral       |
| 6  | p.Gly6Tyr  | 1.01 | 0.01  | Neutral       | 1.01 | 0.01  | Neutral       |
| 6  | p.Gly6Cys  | 1.83 | 0.87  | Indeterminate | 1.83 | 0.87  | Indeterminate |
| 6  | p.Gly6Trp  | 1.44 | 0.53  | Indeterminate | 1.44 | 0.53  | Indeterminate |
| 6  | p.Gly6Phe  | 1.58 | 0.66  | Indeterminate | 1.58 | 0.66  | Indeterminate |
| 7  | p.Ser7Asn  | 0.89 | -0.17 | Neutral       | 0.89 | -0.17 | Neutral       |
| 7  | p.Ser7Lys  | 0.91 | -0.14 | Neutral       | 0.91 | -0.14 | Neutral       |
| 7  | p.Ser7Thr  | 2.04 | 1.03  | Indeterminate | 2.04 | 1.03  | Indeterminate |
| 7  | p.Ser7Arg  | 0.82 | -0.29 | Neutral       | 0.82 | -0.29 | Neutral       |
| 7  | p.Ser7Ser  | 1.00 | 0.00  | Neutral       | 1.00 | 0.00  | Neutral       |
| 7  | p.Ser7Ile  | 1.23 | 0.30  | Indeterminate | 1.23 | 0.30  | Indeterminate |
| 7  | p.Ser7Met  | 1.18 | 0.24  | Indeterminate | 1.18 | 0.24  | Indeterminate |
| 7  | p.Ser7His  | 1.47 | 0.56  | Indeterminate | 1.47 | 0.56  | Indeterminate |
| 7  | p.Ser7Gln  | 1.10 | 0.14  | Neutral       | 1.10 | 0.14  | Neutral       |
| 7  | p.Ser7Pro  | 1.26 | 0.34  | Indeterminate | 1.26 | 0.34  | Indeterminate |
| 7  | p.Ser7Leu  | 1.80 | 0.85  | Indeterminate | 1.80 | 0.85  | Indeterminate |
| 7  | p.Ser7Asp  | 0.99 | -0.02 | Neutral       | 0.99 | -0.02 | Neutral       |
| 7  | p.Ser7Glu  | 1.65 | 0.73  | Indeterminate | 1.65 | 0.73  | Indeterminate |
| 7  | p.Ser7Ala  | 1.95 | 0.97  | Indeterminate | 1.95 | 0.97  | Indeterminate |
| 7  | p.Ser7Gly  | 0.93 | -0.10 | Neutral       | 0.93 | -0.10 | Neutral       |
| 7  | p.Ser7Val  | 1.00 | 0.00  | Neutral       | 1.00 | 0.00  | Neutral       |
| 7  | p.Ser7Tyr  | 2.57 | 1.36  | Deleterious   | 2.57 | 1.36  | Deleterious   |
| 7  | p.Ser7Cys  | 1.26 | 0.33  | Indeterminate | 1.26 | 0.33  | Indeterminate |
| 7  | p.Ser7Trp  | 1.31 | 0.39  | Indeterminate | 1.31 | 0.39  | Indeterminate |
| 7  | p.Ser7Phe  | 1.17 | 0.22  | Neutral       | 1.17 | 0.22  | Neutral       |
| 8  | p.Ser8Asn  | 0.57 | -0.81 | Neutral       | 0.57 | -0.81 | Neutral       |
| 8  | p.Ser8Lys  | 1.73 | 0.79  | Indeterminate | 1.73 | 0.79  | Indeterminate |
| 8  | p.Ser8Thr  | 0.92 | -0.12 | Neutral       | 0.92 | -0.12 | Neutral       |
| 8  | p.Ser8Arg  | 0.69 | -0.53 | Neutral       | 0.69 | -0.53 | Neutral       |
| 8  | p.Ser8Ser  | 1.00 | 0.00  | Neutral       | 1.00 | 0.00  | Neutral       |
| 8  | p.Ser8Ile  | 0.72 | -0.48 | Neutral       | 0.72 | -0.48 | Neutral       |
| 8  | p.Ser8Met  | 0.56 | -0.85 | Neutral       | 0.56 | -0.85 | Neutral       |
| 8  | p.Ser8His  | 0.60 | -0.73 | Neutral       | 0.60 | -0.73 | Neutral       |
| 8  | p.Ser8Gln  | 0.67 | -0.59 | Neutral       | 0.67 | -0.59 | Neutral       |
| 8  | p.Ser8Pro  | 0.83 | -0.26 | Neutral       | 0.83 | -0.26 | Neutral       |
| 8  | p.Ser8Leu  | 0.84 | -0.26 | Neutral       | 0.84 | -0.26 | Neutral       |
| 8  | p.Ser8Asp  | 0.73 | -0.46 | Neutral       | 0.73 | -0.46 | Neutral       |
| 8  | p.Ser8Glu  | 0.45 | -1.15 | Neutral       | 0.45 | -1.15 | Neutral       |
| 8  | p.Ser8Ala  | 0.68 | -0.56 | Neutral       | 0.68 | -0.56 | Neutral       |
| 8  | p.Ser8Gly  | 0.82 | -0.28 | Neutral       | 0.82 | -0.28 | Neutral       |
| 8  | p.Ser8Val  | 0.71 | -0.49 | Neutral       | 0.71 | -0.49 | Neutral       |
| 8  | p.Ser8Tyr  | 0.61 | -0.72 | Neutral       | 0.61 | -0.72 | Neutral       |
| 8  | p.Ser8Cys  | 0.52 | -0.94 | Neutral       | 0.52 | -0.94 | Neutral       |
| 8  | p.Ser8Trp  | 0.58 | -0.79 | Neutral       | 0.58 | -0.79 | Neutral       |
| 8  | p.Ser8Phe  | 0.75 | -0.41 | Neutral       | 0.75 | -0.41 | Neutral       |
| 9  | p.Met9Asn  | 1.10 | 0.14  | Neutral       | 1.10 | 0.14  | Neutral       |
| 9  | p.Met9Lys  | 1.21 | 0.27  | Indeterminate | 1.21 | 0.27  | Indeterminate |
| 9  | p.Met9Thr  | 1.19 | 0.26  | Indeterminate | 1.19 | 0.26  | Indeterminate |
| 9  | p.Met9Arg  | 1.14 | 0.18  | Neutral       | 1.14 | 0.18  | Neutral       |
| 9  | p.Met9Ser  | 1.16 | 0.22  | Neutral       | 1.16 | 0.22  | Neutral       |
| 9  | p.Met9Ile  | 1.18 | 0.24  | Indeterminate | 1.18 | 0.24  | Indeterminate |
| 9  | p.Met9Met  | 1.00 | 0.00  | Neutral       | 1.00 | 0.00  | Neutral       |
| 9  | p.Met9His  | 1.05 | 0.07  | Neutral       | 1.05 | 0.07  | Neutral       |
| 9  | p.Met9Gln  | 1.04 | 0.05  | Neutral       | 1.04 | 0.05  | Neutral       |
| 9  | p.Met9Pro  | 1.18 | 0.24  | Neutral       | 1.18 | 0.24  | Neutral       |
| 9  | p.Met9Leu  | 0.92 | -0.11 | Neutral       | 0.92 | -0.11 | Neutral       |
| 9  | p.Met9Asp  | 1.16 | 0.21  | Neutral       | 1.16 | 0.21  | Neutral       |
| 9  | p.Met9Glu  | 1.02 | 0.03  | Neutral       | 1.02 | 0.03  | Neutral       |
| 9  | p.Met9Ala  | 1.07 | 0.10  | Neutral       | 1.07 | 0.10  | Neutral       |
| 9  | p.Met9Gly  | 1.10 | 0.14  | Neutral       | 1.10 | 0.14  | Neutral       |
| 9  | p.Met9Val  | 1.25 | 0.32  | Indeterminate | 1.25 | 0.32  | Indeterminate |
| 9  | p.Met9Tyr  | 1.00 | 0.00  | Neutral       | 1.00 | 0.00  | Neutral       |
| 9  | p.Met9Cys  | 1.08 | 0.11  | Neutral       | 1.08 | 0.11  | Neutral       |
| 9  | p.Met9Trp  | 1.13 | 0.17  | Neutral       | 1.13 | 0.17  | Neutral       |
| 9  | p.Met9Phe  | 1.14 | 0.19  | Neutral       | 1.14 | 0.19  | Neutral       |
| 10 | p.Glu10Asn | 1.08 | 0.11  | Neutral       | 1.08 | 0.11  | Neutral       |
| 10 | p.Glu10Lys | 2.31 | 1.21  | Deleterious   | 2.31 | 1.21  | Deleterious   |
| 10 | p.Glu10Thr | 1.18 | 0.24  | Neutral       | 1.18 | 0.24  | Neutral       |
| 10 | p.Glu10Arg | 0.94 | -0.09 | Neutral       | 0.94 | -0.09 | Neutral       |
| 10 | p.Glu10Ser | 1.65 | 0.72  | Indeterminate | 1.65 | 0.72  | Indeterminate |
| 10 | p.Glu10Ile | 1.54 | 0.62  | Indeterminate | 1.54 | 0.62  | Indeterminate |
| 10 | p.Glu10Met | 1.67 | 0.74  | Indeterminate | 1.67 | 0.74  | Indeterminate |
| 10 | p.Glu10His | 2.29 | 1.20  | Deleterious   | 2.29 | 1.20  | Deleterious   |
| 10 | p.Glu10Gln | 0.93 | -0.10 | Neutral       | 0.93 | -0.10 | Neutral       |
| 10 | p.Glu10Pro | 1.03 | 0.04  | Neutral       | 1.03 | 0.04  | Neutral       |
| 10 | p.Glu10Leu | 1.15 | 0.20  | Neutral       | 1.15 | 0.20  | Neutral       |
| 10 | p.Glu10Asp | 1.13 | 0.17  | Neutral       | 1.13 | 0.17  | Neutral       |
| 10 | p.Glu10Glu | 1.00 | 0.00  | Neutral       | 1.00 | 0.00  | Neutral       |
| 10 | p.Glu10Ala | 1.77 | 0.82  | Indeterminate | 1.77 | 0.82  | Indeterminate |
| 10 | p.Glu10Gly | 1.04 | 0.06  | Neutral       | 1.04 | 0.06  | Neutral       |
| 10 | p.Glu10Val | 1.04 | 0.06  | Neutral       | 1.04 | 0.06  | Neutral       |
| 10 | p.Glu10Tyr | 1.33 | 0.41  | Indeterminate | 1.33 | 0.41  | Indeterminate |
| 10 | p.Glu10Cys | 1.15 | 0.20  | Neutral       | 1.15 | 0.20  | Neutral       |
| 10 | p.Glu10Trp | 1.01 | 0.02  | Neutral       | 1.01 | 0.02  | Neutral       |
| 10 | p.Glu10Phe | 1.11 | 0.15  | Neutral       | 1.11 | 0.15  | Neutral       |
| 11 | p.Pro11Asn | 1.13 | 0.17  | Neutral       | 1.13 | 0.17  | Neutral       |
| 11 | p.Pro11Lys | 1.28 | 0.36  | Indeterminate | 1.28 | 0.36  | Indeterminate |
| 11 | p.Pro11Thr | 1.44 | 0.53  | Indeterminate | 1.44 | 0.53  | Indeterminate |
| 11 | p.Pro11Arg | 1.08 | 0.11  | Neutral       | 1.08 | 0.11  | Neutral       |
| 11 | p.Pro11Ser | 1.21 | 0.27  | Indeterminate | 1.21 | 0.27  | Indeterminate |
| 11 | p.Pro11Ile | 1.13 | 0.18  | Neutral       | 1.13 | 0.18  | Neutral       |
| 11 | p.Pro11Met | 1.07 | 0.09  | Neutral       | 1.07 | 0.09  | Neutral       |

|    |            |       |       |               |      |       |               |       |               |
|----|------------|-------|-------|---------------|------|-------|---------------|-------|---------------|
| 11 | p.Pro11His | 1.12  | 0.17  | Neutral       |      |       | 1.12          | 0.17  | Neutral       |
| 11 | p.Pro11Gln | 0.96  | -0.06 | Neutral       |      |       | 0.96          | -0.06 | Neutral       |
| 11 | p.Pro11Pro | 1.00  | 0.00  | Neutral       |      |       | 1.00          | 0.00  | Neutral       |
| 11 | p.Pro11Leu | 1.12  | 0.16  | Neutral       |      |       | 1.12          | 0.16  | Neutral       |
| 11 | p.Pro11Asp | 1.07  | 0.09  | Neutral       |      |       | 1.07          | 0.09  | Neutral       |
| 11 | p.Pro11Glu | 1.01  | 0.01  | Neutral       |      |       | 1.01          | 0.01  | Neutral       |
| 11 | p.Pro11Ala | 1.10  | 0.14  | Neutral       |      |       | 1.10          | 0.14  | Neutral       |
| 11 | p.Pro11Gly | 1.20  | 0.26  | Indeterminate |      |       | 1.20          | 0.26  | Indeterminate |
| 11 | p.Pro11Val | 1.09  | 0.12  | Neutral       |      |       | 1.09          | 0.12  | Neutral       |
| 11 | p.Pro11Tyr | 1.22  | 0.28  | Indeterminate |      |       | 1.22          | 0.28  | Indeterminate |
| 11 | p.Pro11Cys | 1.01  | 0.02  | Neutral       |      |       | 1.01          | 0.02  | Neutral       |
| 11 | p.Pro11Trp | 1.31  | 0.39  | Indeterminate |      |       | 1.31          | 0.39  | Indeterminate |
| 11 | p.Pro11Phe | 1.22  | 0.29  | Indeterminate |      |       | 1.22          | 0.29  | Indeterminate |
| 12 | p.Ser12Asn | 0.92  | -0.12 | Neutral       |      |       | 0.92          | -0.12 | Neutral       |
| 12 | p.Ser12Lys | 0.71  | -0.49 | Neutral       |      |       | 0.71          | -0.49 | Neutral       |
| 12 | p.Ser12Thr | 0.76  | -0.39 | Neutral       |      |       | 0.76          | -0.39 | Neutral       |
| 12 | p.Ser12Arg | 0.84  | -0.25 | Neutral       |      |       | 0.84          | -0.25 | Neutral       |
| 12 | p.Ser12Ser | 1.00  | 0.00  | Neutral       |      |       | 1.00          | 0.00  | Neutral       |
| 12 | p.Ser12Ile | 0.81  | -0.31 | Neutral       |      |       | 0.81          | -0.31 | Neutral       |
| 12 | p.Ser12Met | 0.71  | -0.49 | Neutral       |      |       | 0.71          | -0.49 | Neutral       |
| 12 | p.Ser12His | 1.12  | 0.16  | Neutral       |      |       | 1.12          | 0.16  | Neutral       |
| 12 | p.Ser12Gln | 1.15  | 0.20  | Neutral       |      |       | 1.15          | 0.20  | Neutral       |
| 12 | p.Ser12Pro | 0.78  | -0.36 | Neutral       |      |       | 0.78          | -0.36 | Neutral       |
| 12 | p.Ser12Leu | 2.35  | 1.23  | Deleterious   |      |       | 2.35          | 1.23  | Deleterious   |
| 12 | p.Ser12Asp | 0.66  | -0.59 | Neutral       |      |       | 0.66          | -0.59 | Neutral       |
| 12 | p.Ser12Glu | 0.88  | -0.18 | Neutral       |      |       | 0.88          | -0.18 | Neutral       |
| 12 | p.Ser12Ala | 0.85  | -0.23 | Neutral       |      |       | 0.85          | -0.23 | Neutral       |
| 12 | p.Ser12Gly | 0.82  | -0.29 | Neutral       |      |       | 0.82          | -0.29 | Neutral       |
| 12 | p.Ser12Val | 1.13  | 0.18  | Neutral       |      |       | 1.13          | 0.18  | Neutral       |
| 12 | p.Ser12Tyr | 0.75  | -0.41 | Neutral       |      |       | 0.75          | -0.41 | Neutral       |
| 12 | p.Ser12Cys | 1.13  | 0.18  | Neutral       |      |       | 1.13          | 0.18  | Neutral       |
| 12 | p.Ser12Trp | 1.13  | 0.18  | Neutral       |      |       | 1.13          | 0.18  | Neutral       |
| 12 | p.Ser12Phe | 1.11  | 0.15  | Neutral       |      |       | 1.11          | 0.15  | Neutral       |
| 13 | p.Alal3Asn | 0.61  | -0.72 | Neutral       |      |       | 0.61          | -0.72 | Neutral       |
| 13 | p.Alal3Lys | 0.71  | -0.49 | Neutral       |      |       | 0.71          | -0.49 | Neutral       |
| 13 | p.Alal3Thr | 0.70  | -0.51 | Neutral       |      |       | 0.70          | -0.51 | Neutral       |
| 13 | p.Alal3Arg | 0.61  | -0.72 | Neutral       |      |       | 0.61          | -0.72 | Neutral       |
| 13 | p.Alal3Ser | 0.63  | -0.66 | Neutral       |      |       | 0.63          | -0.66 | Neutral       |
| 13 | p.Alal3Ile | 0.65  | -0.61 | Neutral       |      |       | 0.65          | -0.61 | Neutral       |
| 13 | p.Alal3Met | 1.07  | 0.10  | Neutral       |      |       | 1.07          | 0.10  | Neutral       |
| 13 | p.Alal3His | 0.75  | -0.41 | Neutral       |      |       | 0.75          | -0.41 | Neutral       |
| 13 | p.Alal3Gln | 0.66  | -0.59 | Neutral       |      |       | 0.66          | -0.59 | Neutral       |
| 13 | p.Alal3Pro | 0.53  | -0.90 | Neutral       |      |       | 0.53          | -0.90 | Neutral       |
| 13 | p.Alal3Leu | 0.74  | -0.43 | Neutral       |      |       | 0.74          | -0.43 | Neutral       |
| 13 | p.Alal3Asp | 0.68  | -0.55 | Neutral       |      |       | 0.68          | -0.55 | Neutral       |
| 13 | p.Alal3Glu | 0.64  | -0.64 | Neutral       |      |       | 0.64          | -0.64 | Neutral       |
| 13 | p.Alal3Ala | 1.00  | 0.00  | Neutral       |      |       | 1.00          | 0.00  | Neutral       |
| 13 | p.Alal3Gly | 0.57  | -0.81 | Neutral       |      |       | 0.57          | -0.81 | Neutral       |
| 13 | p.Alal3Val | 0.70  | -0.51 | Neutral       |      |       | 0.70          | -0.51 | Neutral       |
| 13 | p.Alal3Tyr | 1.03  | 0.04  | Neutral       |      |       | 1.03          | 0.04  | Neutral       |
| 13 | p.Alal3Cys | 0.82  | -0.29 | Neutral       |      |       | 0.82          | -0.29 | Neutral       |
| 13 | p.Alal3Trp | 0.77  | -0.38 | Neutral       |      |       | 0.77          | -0.38 | Neutral       |
| 13 | p.Alal3Phe | 0.94  | -0.09 | Neutral       |      |       | 0.94          | -0.09 | Neutral       |
| 14 | p.Asp14Asn | 1.14  | 0.19  | Neutral       |      |       | 1.14          | 0.19  | Neutral       |
| 14 | p.Asp14Lys | 1.10  | 0.14  | Neutral       |      |       | 1.10          | 0.14  | Neutral       |
| 14 | p.Asp14Thr | 0.95  | -0.08 | Neutral       |      |       | 0.95          | -0.08 | Neutral       |
| 14 | p.Asp14Arg | 1.63  | 0.71  | Indeterminate |      |       | 1.63          | 0.71  | Indeterminate |
| 14 | p.Asp14Ser | 0.92  | -0.13 | Neutral       |      |       | 0.92          | -0.13 | Neutral       |
| 14 | p.Asp14Ile | 2.30  | 1.20  | Deleterious   |      |       | 2.30          | 1.20  | Deleterious   |
| 14 | p.Asp14Met | 1.77  | 0.82  | Indeterminate |      |       | 1.77          | 0.82  | Indeterminate |
| 14 | p.Asp14His | 0.95  | -0.07 | Neutral       |      |       | 0.95          | -0.07 | Neutral       |
| 14 | p.Asp14Gln | 1.12  | 0.17  | Neutral       |      |       | 1.12          | 0.17  | Neutral       |
| 14 | p.Asp14Pro | 2.56  | 1.36  | Deleterious   |      |       | 2.56          | 1.36  | Deleterious   |
| 14 | p.Asp14Leu | 1.80  | 0.84  | Indeterminate |      |       | 1.80          | 0.84  | Indeterminate |
| 14 | p.Asp14Asp | 1.00  | 0.00  | Neutral       |      |       | 1.00          | 0.00  | Neutral       |
| 14 | p.Asp14Glu | 1.09  | 0.12  | Neutral       |      |       | 1.09          | 0.12  | Neutral       |
| 14 | p.Asp14Ala | 1.37  | 0.46  | Indeterminate |      |       | 1.37          | 0.46  | Indeterminate |
| 14 | p.Asp14Gly | 1.04  | 0.06  | Neutral       |      |       | 1.04          | 0.06  | Neutral       |
| 14 | p.Asp14Val | 2.47  | 1.31  | Deleterious   |      |       | 2.47          | 1.31  | Deleterious   |
| 14 | p.Asp14Tyr | 1.93  | 0.95  | Indeterminate |      |       | 1.93          | 0.95  | Indeterminate |
| 14 | p.Asp14Cys | 1.05  | 0.06  | Neutral       |      |       | 1.05          | 0.06  | Neutral       |
| 14 | p.Asp14Trp | 1.87  | 0.90  | Indeterminate |      |       | 1.87          | 0.90  | Indeterminate |
| 14 | p.Asp14Phe | 1.93  | 0.95  | Indeterminate |      |       | 1.93          | 0.95  | Indeterminate |
| 15 | p.Trp15Asn | 1.51  | 0.59  | Indeterminate | 0.73 | -0.46 | Neutral       | 1.12  | 0.16          |
| 15 | p.Trp15Lys | 1.37  | 0.46  | Indeterminate | 0.72 | -0.48 | Neutral       | 1.04  | 0.06          |
| 15 | p.Trp15Thr | 1.65  | 0.73  | Indeterminate | 1.03 | 0.04  | Neutral       | 1.34  | 0.42          |
| 15 | p.Trp15Arg | 1.19  | 0.25  | Indeterminate | 0.65 | -0.62 | Neutral       | 0.92  | -0.12         |
| 15 | p.Trp15Ser | 1.37  | 0.46  | Indeterminate | 0.69 | -0.54 | Neutral       | 1.03  | 0.04          |
| 15 | p.Trp15Ile | 1.03  | 0.05  | Neutral       | 0.99 | -0.02 | Neutral       | 1.01  | 0.01          |
| 15 | p.Trp15Met | 1.13  | 0.17  | Neutral       | 0.93 | -0.10 | Neutral       | 1.03  | 0.04          |
| 15 | p.Trp15His | 1.48  | 0.57  | Indeterminate | 1.61 | 0.69  | Indeterminate | 1.55  | 0.63          |
| 15 | p.Trp15Gln | 1.46  | 0.54  | Indeterminate | 1.13 | 0.18  | Neutral       | 1.29  | 0.37          |
| 15 | p.Trp15Pro | 1.83  | 0.87  | Indeterminate | 1.46 | 0.55  | Indeterminate | 1.65  | 0.72          |
| 15 | p.Trp15Leu | 1.30  | 0.38  | Indeterminate | 1.14 | 0.19  | Neutral       | 1.22  | 0.29          |
| 15 | p.Trp15Asp | 1.28  | 0.35  | Indeterminate | 1.06 | 0.08  | Neutral       | 1.17  | 0.23          |
| 15 | p.Trp15Glu | 1.09  | 0.13  | Neutral       | 1.11 | 0.15  | Neutral       | 1.10  | 0.14          |
| 15 | p.Trp15Ala | 1.36  | 0.44  | Indeterminate | 0.77 | -0.37 | Neutral       | 1.07  | 0.09          |
| 15 | p.Trp15Gly | 1.18  | 0.24  | Neutral       | 1.46 | 0.54  | Indeterminate | 1.32  | 0.40          |
| 15 | p.Trp15Val | 1.06  | 0.08  | Neutral       | 0.62 | -0.68 | Neutral       | 0.84  | -0.25         |
| 15 | p.Trp15Tyr | 1.67  | 0.74  | Indeterminate | 0.91 | -0.13 | Neutral       | 1.29  | 0.37          |
| 15 | p.Trp15Cys | 1.51  | 0.59  | Indeterminate | 0.82 | -0.28 | Neutral       | 1.17  | 0.22          |
| 15 | p.Trp15Trp | 1.00  | 0.00  | Neutral       | 1.00 | 0.00  | Neutral       | 1.00  | 0.00          |
| 15 | p.Trp15Phe | 1.29  | 0.37  | Indeterminate | 0.77 | -0.37 | Neutral       | 1.03  | 0.05          |
| 16 | p.Leu16Asn | 17.05 | 4.09  | Deleterious   |      |       | 17.05         | 4.09  | Deleterious   |
| 16 | p.Leu16Lys | 24.15 | 4.59  | Deleterious   |      |       | 24.15         | 4.59  | Deleterious   |
| 16 | p.Leu16Thr | 2.31  | 1.21  | Deleterious   |      |       | 2.31          | 1.21  | Deleterious   |
| 16 | p.Leu16Arg | 28.65 | 4.84  | Deleterious   |      |       | 28.65         | 4.84  | Deleterious   |
| 16 | p.Leu16Ser | 12.85 | 3.68  | Deleterious   |      |       | 12.85         | 3.68  | Deleterious   |
| 16 | p.Leu16Ile | 1.34  | 0.42  | Indeterminate |      |       | 1.34          | 0.42  | Indeterminate |
| 16 | p.Leu16Met | 1.18  | 0.24  | Indeterminate |      |       | 1.18          | 0.24  | Indeterminate |
| 16 | p.Leu16His | 16.82 | 4.07  | Deleterious   |      |       | 16.82         | 4.07  | Deleterious   |
| 16 | p.Leu16Gln | 16.71 | 4.06  | Deleterious   |      |       | 16.71         | 4.06  | Deleterious   |
| 16 | p.Leu16Pro | 15.82 | 3.98  | Deleterious   |      |       | 15.82         | 3.98  | Deleterious   |
| 16 | p.Leu16Leu | 1.00  | 0.00  | Neutral       |      |       | 1.00          | 0.00  | Neutral       |
| 16 | p.Leu16Asp | 24.00 | 4.59  | Deleterious   |      |       | 24.00         | 4.59  | Deleterious   |
| 16 | p.Leu16Glu | 21.71 | 4.44  | Deleterious   |      |       | 21.71         | 4.44  | Deleterious   |

|    |            |       |       |               |       |       |               |               |       |               |
|----|------------|-------|-------|---------------|-------|-------|---------------|---------------|-------|---------------|
| 16 | p.Leu16Ala | 4.92  | 2.30  | Deleterious   |       | 4.92  | 2.30          | Deleterious   |       |               |
| 16 | p.Leu16Gly | 19.95 | 4.32  | Deleterious   |       | 19.95 | 4.32          | Deleterious   |       |               |
| 16 | p.Leu16Val | 2.04  | 1.03  | Indeterminate |       | 2.04  | 1.03          | Indeterminate |       |               |
| 16 | p.Leu16Tyr | 21.66 | 4.44  | Deleterious   |       | 21.66 | 4.44          | Deleterious   |       |               |
| 16 | p.Leu16Cys | 2.04  | 1.03  | Indeterminate |       | 2.04  | 1.03          | Indeterminate |       |               |
| 16 | p.Leu16Trp | 21.58 | 4.43  | Deleterious   |       | 21.58 | 4.43          | Deleterious   |       |               |
| 16 | p.Leu16Phe | 1.48  | 0.56  | Indeterminate |       | 1.48  | 0.56          | Indeterminate |       |               |
| 17 | p.Ala17Asn | 1.60  | 0.68  | Indeterminate |       | 1.60  | 0.68          | Indeterminate |       |               |
| 17 | p.Ala17Lys | 36.62 | 5.19  | Deleterious   |       | 36.62 | 5.19          | Deleterious   |       |               |
| 17 | p.Ala17Thr | 1.13  | 0.18  | Neutral       |       | 1.13  | 0.18          | Neutral       |       |               |
| 17 | p.Ala17Arg | 39.11 | 5.29  | Deleterious   |       | 39.11 | 5.29          | Deleterious   |       |               |
| 17 | p.Ala17Ser | 1.14  | 0.19  | Neutral       |       | 1.14  | 0.19          | Neutral       |       |               |
| 17 | p.Ala17Ile | 1.70  | 0.77  | Indeterminate |       | 1.70  | 0.77          | Indeterminate |       |               |
| 17 | p.Ala17Met | 3.32  | 1.73  | Deleterious   |       | 3.32  | 1.73          | Deleterious   |       |               |
| 17 | p.Ala17His | 1.14  | 0.19  | Neutral       |       | 1.14  | 0.19          | Neutral       |       |               |
| 17 | p.Ala17Gln | 3.54  | 1.82  | Deleterious   |       | 3.54  | 1.82          | Deleterious   |       |               |
| 17 | p.Ala17Pro | 1.10  | 0.13  | Neutral       |       | 1.10  | 0.13          | Neutral       |       |               |
| 17 | p.Ala17Leu | 6.23  | 2.64  | Deleterious   |       | 6.23  | 2.64          | Deleterious   |       |               |
| 17 | p.Ala17Asp | 2.99  | 1.58  | Deleterious   |       | 2.99  | 1.58          | Deleterious   |       |               |
| 17 | p.Ala17Glu | 15.21 | 3.93  | Deleterious   |       | 15.21 | 3.93          | Deleterious   |       |               |
| 17 | p.Ala17Ala | 1.00  | 0.00  | Neutral       |       | 1.00  | 0.00          | Neutral       |       |               |
| 17 | p.Ala17Gly | 1.01  | 0.01  | Neutral       |       | 1.01  | 0.01          | Neutral       |       |               |
| 17 | p.Ala17Val | 1.04  | 0.06  | Neutral       |       | 1.04  | 0.06          | Neutral       |       |               |
| 17 | p.Ala17Tyr | 4.73  | 2.24  | Deleterious   |       | 4.73  | 2.24          | Deleterious   |       |               |
| 17 | p.Ala17Cys | 0.76  | -0.40 | Neutral       |       | 0.76  | -0.40         | Neutral       |       |               |
| 17 | p.Ala17Trp | 5.41  | 2.43  | Deleterious   |       | 5.41  | 2.43          | Deleterious   |       |               |
| 17 | p.Ala17Phe | 3.04  | 1.61  | Deleterious   |       | 3.04  | 1.61          | Deleterious   |       |               |
| 18 | p.Thr18Asn | 2.54  | 1.34  | Deleterious   |       | 2.54  | 1.34          | Deleterious   |       |               |
| 18 | p.Thr18Lys | 1.83  | 0.87  | Indeterminate |       | 1.83  | 0.87          | Indeterminate |       |               |
| 18 | p.Thr18Thr | 1.00  | 0.00  | Neutral       |       | 1.00  | 0.00          | Neutral       |       |               |
| 18 | p.Thr18Arg | 1.81  | 0.85  | Indeterminate |       | 1.81  | 0.85          | Indeterminate |       |               |
| 18 | p.Thr18Ser | 1.45  | 0.53  | Indeterminate |       | 1.45  | 0.53          | Indeterminate |       |               |
| 18 | p.Thr18Ile | 2.08  | 1.06  | Indeterminate |       | 2.08  | 1.06          | Indeterminate |       |               |
| 18 | p.Thr18Met | 2.38  | 1.25  | Deleterious   |       | 2.38  | 1.25          | Deleterious   |       |               |
| 18 | p.Thr18His | 1.36  | 0.44  | Indeterminate |       | 1.36  | 0.44          | Indeterminate |       |               |
| 18 | p.Thr18Gln | 1.66  | 0.73  | Indeterminate |       | 1.66  | 0.73          | Indeterminate |       |               |
| 18 | p.Thr18Pro | 11.34 | 3.50  | Deleterious   |       | 11.34 | 3.50          | Deleterious   |       |               |
| 18 | p.Thr18Leu | 2.42  | 1.28  | Deleterious   |       | 2.42  | 1.28          | Deleterious   |       |               |
| 18 | p.Thr18Asp | 1.66  | 0.73  | Indeterminate |       | 1.66  | 0.73          | Indeterminate |       |               |
| 18 | p.Thr18Glu | 1.46  | 0.55  | Indeterminate |       | 1.46  | 0.55          | Indeterminate |       |               |
| 18 | p.Thr18Ala | 2.46  | 1.30  | Deleterious   |       | 2.46  | 1.30          | Deleterious   |       |               |
| 18 | p.Thr18Gly | 1.46  | 0.54  | Indeterminate |       | 1.46  | 0.54          | Indeterminate |       |               |
| 18 | p.Thr18Val | 1.50  | 0.59  | Indeterminate |       | 1.50  | 0.59          | Indeterminate |       |               |
| 18 | p.Thr18Tyr | 2.54  | 1.34  | Deleterious   |       | 2.54  | 1.34          | Deleterious   |       |               |
| 18 | p.Thr18Cys | 1.09  | 0.13  | Neutral       |       | 1.09  | 0.13          | Neutral       |       |               |
| 18 | p.Thr18Trp | 1.89  | 0.92  | Indeterminate |       | 1.89  | 0.92          | Indeterminate |       |               |
| 18 | p.Thr18Phe | 1.44  | 0.52  | Indeterminate |       | 1.44  | 0.52          | Indeterminate |       |               |
| 19 | p.Ala19Asn | 0.44  | -1.20 | Neutral       |       | 0.44  | -1.20         | Neutral       |       |               |
| 19 | p.Ala19Lys | 1.07  | 0.10  | Neutral       |       | 1.07  | 0.10          | Neutral       |       |               |
| 19 | p.Ala19Thr | 0.67  | -0.57 | Neutral       |       | 0.67  | -0.57         | Neutral       |       |               |
| 19 | p.Ala19Arg | 0.97  | -0.04 | Neutral       |       | 0.97  | -0.04         | Neutral       |       |               |
| 19 | p.Ala19Ser | 0.42  | -1.24 | Neutral       |       | 0.42  | -1.24         | Neutral       |       |               |
| 19 | p.Ala19Ile | 0.58  | -0.79 | Neutral       |       | 0.58  | -0.79         | Neutral       |       |               |
| 19 | p.Ala19Met | 0.41  | -1.29 | Neutral       |       | 0.41  | -1.29         | Neutral       |       |               |
| 19 | p.Ala19His | 0.73  | -0.46 | Neutral       |       | 0.73  | -0.46         | Neutral       |       |               |
| 19 | p.Ala19Gln | 0.42  | -1.26 | Neutral       |       | 0.42  | -1.26         | Neutral       |       |               |
| 19 | p.Ala19Pro | 7.17  | 2.84  | Deleterious   |       | 7.17  | 2.84          | Deleterious   |       |               |
| 19 | p.Ala19Leu | 0.38  | -1.40 | Neutral       |       | 0.38  | -1.40         | Neutral       |       |               |
| 19 | p.Ala19Asp | 1.11  | 0.15  | Neutral       |       | 1.11  | 0.15          | Neutral       |       |               |
| 19 | p.Ala19Glu | 0.50  | -0.99 | Neutral       |       | 0.50  | -0.99         | Neutral       |       |               |
| 19 | p.Ala19Ala | 1.00  | 0.00  | Neutral       |       | 1.00  | 0.00          | Neutral       |       |               |
| 19 | p.Ala19Gly | 0.46  | -1.12 | Neutral       |       | 0.46  | -1.12         | Neutral       |       |               |
| 19 | p.Ala19Val | 0.54  | -0.88 | Neutral       |       | 0.54  | -0.88         | Neutral       |       |               |
| 19 | p.Ala19Tyr | 0.57  | -0.81 | Neutral       |       | 0.57  | -0.81         | Neutral       |       |               |
| 19 | p.Ala19Cys | 1.14  | 0.19  | Neutral       |       | 1.14  | 0.19          | Neutral       |       |               |
| 19 | p.Ala19Trp | 0.40  | -1.33 | Neutral       |       | 0.40  | -1.33         | Neutral       |       |               |
| 19 | p.Ala19Phe | 0.26  | -1.96 | Neutral       |       | 0.26  | -1.96         | Neutral       |       |               |
| 20 | p.Ala20Asn | 17.14 | 4.10  | Deleterious   | 21.96 | 4.46  | Deleterious   | 19.55         | 4.29  | Deleterious   |
| 20 | p.Ala20Lys | 21.01 | 4.39  | Deleterious   | 26.93 | 4.75  | Deleterious   | 23.97         | 4.58  | Deleterious   |
| 20 | p.Ala20Thr | 1.70  | 0.77  | Indeterminate | 1.50  | 0.58  | Indeterminate | 1.60          | 0.68  | Indeterminate |
| 20 | p.Ala20Arg | 19.79 | 4.31  | Deleterious   | 27.73 | 4.79  | Deleterious   | 23.76         | 4.57  | Deleterious   |
| 20 | p.Ala20Ser | 0.95  | -0.07 | Neutral       | 1.80  | 0.85  | Indeterminate | 1.38          | 0.46  | Indeterminate |
| 20 | p.Ala20Ile | 9.71  | 3.28  | Deleterious   | 10.13 | 3.34  | Deleterious   | 9.92          | 3.31  | Deleterious   |
| 20 | p.Ala20Met | 7.13  | 2.83  | Deleterious   | 8.50  | 3.09  | Deleterious   | 7.81          | 2.97  | Deleterious   |
| 20 | p.Ala20His | 19.43 | 4.28  | Deleterious   | 27.11 | 4.76  | Deleterious   | 23.27         | 4.54  | Deleterious   |
| 20 | p.Ala20Gln | 21.24 | 4.41  | Deleterious   | 26.35 | 4.72  | Deleterious   | 23.79         | 4.57  | Deleterious   |
| 20 | p.Ala20Pro | 21.60 | 4.43  | Deleterious   | 25.71 | 4.68  | Deleterious   | 23.65         | 4.56  | Deleterious   |
| 20 | p.Ala20Leu | 7.16  | 2.84  | Deleterious   | 8.21  | 3.04  | Deleterious   | 7.69          | 2.94  | Deleterious   |
| 20 | p.Ala20Asp | 18.97 | 4.25  | Deleterious   | 25.25 | 4.66  | Deleterious   | 22.11         | 4.47  | Deleterious   |
| 20 | p.Ala20Glu | 20.26 | 4.34  | Deleterious   | 28.11 | 4.81  | Deleterious   | 24.18         | 4.60  | Deleterious   |
| 20 | p.Ala20Ala | 1.00  | 0.00  | Neutral       | 1.00  | 0.00  | Neutral       | 1.00          | 0.00  | Neutral       |
| 20 | p.Ala20Gly | 5.42  | 2.44  | Deleterious   | 1.92  | 0.94  | Indeterminate | 3.67          | 1.88  | Deleterious   |
| 20 | p.Ala20Val | 1.15  | 0.20  | Neutral       | 1.54  | 0.62  | Indeterminate | 1.34          | 0.42  | Indeterminate |
| 20 | p.Ala20Tyr | 21.80 | 4.45  | Deleterious   | 26.74 | 4.74  | Deleterious   | 24.27         | 4.60  | Deleterious   |
| 20 | p.Ala20Cys | 1.18  | 0.24  | Indeterminate | 1.34  | 0.42  | Indeterminate | 1.26          | 0.33  | Indeterminate |
| 20 | p.Ala20Trp | 21.50 | 4.43  | Deleterious   | 27.63 | 4.79  | Deleterious   | 24.57         | 4.62  | Deleterious   |
| 20 | p.Ala20Phe | 19.92 | 4.32  | Deleterious   | 26.72 | 4.74  | Deleterious   | 23.32         | 4.54  | Deleterious   |
| 21 | p.Ala21Asn | 4.93  | 2.30  | Deleterious   |       |       |               | 4.93          | 2.30  | Deleterious   |
| 21 | p.Ala21Lys | 30.37 | 4.92  | Deleterious   |       |       |               | 30.37         | 4.92  | Deleterious   |
| 21 | p.Ala21Thr | 1.48  | 0.57  | Indeterminate |       |       |               | 1.48          | 0.57  | Indeterminate |
| 21 | p.Ala21Arg | 12.05 | 3.59  | Deleterious   |       |       |               | 12.05         | 3.59  | Deleterious   |
| 21 | p.Ala21Ser | 1.05  | 0.07  | Neutral       |       |       |               | 1.05          | 0.07  | Neutral       |
| 21 | p.Ala21Ile | 2.45  | 1.29  | Deleterious   |       |       |               | 2.45          | 1.29  | Deleterious   |
| 21 | p.Ala21Met | 3.33  | 1.73  | Deleterious   |       |       |               | 3.33          | 1.73  | Deleterious   |
| 21 | p.Ala21His | 9.34  | 3.22  | Deleterious   |       |       |               | 9.34          | 3.22  | Deleterious   |
| 21 | p.Ala21Gln | 6.36  | 2.67  | Deleterious   |       |       |               | 6.36          | 2.67  | Deleterious   |
| 21 | p.Ala21Pro | 37.99 | 5.25  | Deleterious   |       |       |               | 37.99         | 5.25  | Deleterious   |
| 21 | p.Ala21Leu | 1.65  | 0.72  | Indeterminate |       |       |               | 1.65          | 0.72  | Indeterminate |
| 21 | p.Ala21Asp | 23.39 | 4.55  | Deleterious   |       |       |               | 23.39         | 4.55  | Deleterious   |
| 21 | p.Ala21Glu | 9.77  | 3.29  | Deleterious   |       |       |               | 9.77          | 3.29  | Deleterious   |
| 21 | p.Ala21Ala | 1.00  | 0.00  | Neutral       |       |       |               | 1.00          | 0.00  | Neutral       |
| 21 | p.Ala21Gly | 0.97  | -0.04 | Neutral       |       |       |               | 0.97          | -0.04 | Neutral       |
| 21 | p.Ala21Val | 1.17  | 0.23  | Neutral       |       |       |               | 1.17          | 0.23  | Neutral       |
| 21 | p.Ala21Tyr | 7.25  | 2.86  | Deleterious   |       |       |               | 7.25          | 2.86  | Deleterious   |
| 21 | p.Ala21Cys | 1.05  | 0.07  | Neutral       |       |       |               | 1.05          | 0.07  | Neutral       |
| 21 | p.Ala21Trp | 7.68  | 2.94  | Deleterious   |       |       |               | 7.68          | 2.94  | Deleterious   |

|    |            |       |       |               |      |       |               |       |               |               |
|----|------------|-------|-------|---------------|------|-------|---------------|-------|---------------|---------------|
| 21 | p.Ala21Phe | 6.02  | 2.59  | Deleterious   |      |       | 6.02          | 2.59  | Deleterious   |               |
| 22 | p.Arg22Asn | 0.38  | -1.41 | Neutral       |      |       | 0.38          | -1.41 | Neutral       |               |
| 22 | p.Arg22Lys | 0.99  | -0.01 | Neutral       |      |       | 0.99          | -0.01 | Neutral       |               |
| 22 | p.Arg22Thr | 2.13  | 1.09  | Deleterious   |      |       | 2.13          | 1.09  | Deleterious   |               |
| 22 | p.Arg22Arg | 1.00  | 0.00  | Neutral       |      |       | 1.00          | 0.00  | Neutral       |               |
| 22 | p.Arg22Ser | 1.50  | 0.58  | Indeterminate |      |       | 1.50          | 0.58  | Indeterminate |               |
| 22 | p.Arg22Ile | 0.86  | -0.21 | Neutral       |      |       | 0.86          | -0.21 | Neutral       |               |
| 22 | p.Arg22Met | 1.40  | 0.49  | Indeterminate |      |       | 1.40          | 0.49  | Indeterminate |               |
| 22 | p.Arg22His | 0.21  | -2.22 | Neutral       |      |       | 0.21          | -2.22 | Neutral       |               |
| 22 | p.Arg22Gln | 0.39  | -1.36 | Neutral       |      |       | 0.39          | -1.36 | Neutral       |               |
| 22 | p.Arg22Pro | 6.72  | 2.75  | Deleterious   |      |       | 6.72          | 2.75  | Deleterious   |               |
| 22 | p.Arg22Leu | 0.54  | -0.89 | Neutral       |      |       | 0.54          | -0.89 | Neutral       |               |
| 22 | p.Arg22Asp | 0.90  | -0.15 | Neutral       |      |       | 0.90          | -0.15 | Neutral       |               |
| 22 | p.Arg22Glu | 0.31  | -1.70 | Neutral       |      |       | 0.31          | -1.70 | Neutral       |               |
| 22 | p.Arg22Ala | 0.40  | -1.31 | Neutral       |      |       | 0.40          | -1.31 | Neutral       |               |
| 22 | p.Arg22Gly | 3.32  | 1.73  | Deleterious   |      |       | 3.32          | 1.73  | Deleterious   |               |
| 22 | p.Arg22Val | 0.51  | -0.97 | Neutral       |      |       | 0.51          | -0.97 | Neutral       |               |
| 22 | p.Arg22Tyr | 0.97  | -0.04 | Neutral       |      |       | 0.97          | -0.04 | Neutral       |               |
| 22 | p.Arg22Cys | 0.22  | -2.18 | Neutral       |      |       | 0.22          | -2.18 | Neutral       |               |
| 22 | p.Arg22Trp | 1.58  | 0.66  | Indeterminate |      |       | 1.58          | 0.66  | Indeterminate |               |
| 22 | p.Arg22Phe | 1.80  | 0.85  | Indeterminate |      |       | 1.80          | 0.85  | Indeterminate |               |
| 23 | p.Gly23Asn | 2.46  | 1.30  | Deleterious   |      |       | 2.46          | 1.30  | Deleterious   |               |
| 23 | p.Gly23Lys | 20.06 | 4.33  | Deleterious   |      |       | 20.06         | 4.33  | Deleterious   |               |
| 23 | p.Gly23Thr | 20.30 | 4.34  | Deleterious   |      |       | 20.30         | 4.34  | Deleterious   |               |
| 23 | p.Gly23Arg | 18.67 | 4.22  | Deleterious   |      |       | 18.67         | 4.22  | Deleterious   |               |
| 23 | p.Gly23Ser | 3.96  | 1.99  | Deleterious   |      |       | 3.96          | 1.99  | Deleterious   |               |
| 23 | p.Gly23Ile | 23.20 | 4.54  | Deleterious   |      |       | 23.20         | 4.54  | Deleterious   |               |
| 23 | p.Gly23Met | 19.90 | 4.31  | Deleterious   |      |       | 19.90         | 4.31  | Deleterious   |               |
| 23 | p.Gly23His | 18.89 | 4.24  | Deleterious   |      |       | 18.89         | 4.24  | Deleterious   |               |
| 23 | p.Gly23Gln | 18.28 | 4.19  | Deleterious   |      |       | 18.28         | 4.19  | Deleterious   |               |
| 23 | p.Gly23Pro | 19.40 | 4.28  | Deleterious   |      |       | 19.40         | 4.28  | Deleterious   |               |
| 23 | p.Gly23Leu | 22.55 | 4.50  | Deleterious   |      |       | 22.55         | 4.50  | Deleterious   |               |
| 23 | p.Gly23Asp | 14.29 | 3.84  | Deleterious   |      |       | 14.29         | 3.84  | Deleterious   |               |
| 23 | p.Gly23Glu | 21.21 | 4.41  | Deleterious   |      |       | 21.21         | 4.41  | Deleterious   |               |
| 23 | p.Gly23Ala | 1.27  | 0.35  | Indeterminate |      |       | 1.27          | 0.35  | Indeterminate |               |
| 23 | p.Gly23Gly | 1.00  | 0.00  | Neutral       |      |       | 1.00          | 0.00  | Neutral       |               |
| 23 | p.Gly23Val | 19.64 | 4.30  | Deleterious   |      |       | 19.64         | 4.30  | Deleterious   |               |
| 23 | p.Gly23Tyr | 20.02 | 4.32  | Deleterious   |      |       | 20.02         | 4.32  | Deleterious   |               |
| 23 | p.Gly23Cys | 13.02 | 3.70  | Deleterious   |      |       | 13.02         | 3.70  | Deleterious   |               |
| 23 | p.Gly23Trp | 23.15 | 4.53  | Deleterious   |      |       | 23.15         | 4.53  | Deleterious   |               |
| 23 | p.Gly23Phe | 20.81 | 4.38  | Deleterious   |      |       | 20.81         | 4.38  | Deleterious   |               |
| 24 | p.Arg24Asn | 0.74  | -0.44 | Neutral       | 1.02 | 0.02  | Neutral       | 0.88  | -0.19         | Neutral       |
| 24 | p.Arg24Lys | 0.60  | -0.75 | Neutral       | 1.18 | 0.24  | Neutral       | 0.89  | -0.17         | Neutral       |
| 24 | p.Arg24Thr | 0.72  | -0.47 | Neutral       | 1.28 | 0.36  | Indeterminate | 1.00  | 0.00          | Neutral       |
| 24 | p.Arg24Arg | 1.00  | 0.00  | Neutral       | 1.00 | 0.00  | Neutral       | 1.00  | 0.00          | Neutral       |
| 24 | p.Arg24Ser | 0.58  | -0.79 | Neutral       | 0.98 | -0.03 | Neutral       | 0.78  | -0.36         | Neutral       |
| 24 | p.Arg24Ile | 0.76  | -0.40 | Neutral       | 0.90 | -0.16 | Neutral       | 0.83  | -0.27         | Neutral       |
| 24 | p.Arg24Met | 0.90  | -0.15 | Neutral       | 1.08 | 0.12  | Neutral       | 0.99  | -0.01         | Neutral       |
| 24 | p.Arg24His | 0.53  | -0.93 | Neutral       | 0.83 | -0.27 | Neutral       | 0.68  | -0.56         | Neutral       |
| 24 | p.Arg24Gln | 1.53  | 0.62  | Indeterminate | 1.60 | 0.68  | Indeterminate | 1.57  | 0.65          | Indeterminate |
| 24 | p.Arg24Pro | 9.29  | 3.22  | Deleterious   | 7.17 | 2.84  | Deleterious   | 8.23  | 3.04          | Deleterious   |
| 24 | p.Arg24Leu | 0.82  | -0.29 | Neutral       | 1.06 | 0.08  | Neutral       | 0.94  | -0.10         | Neutral       |
| 24 | p.Arg24Asp | 0.74  | -0.43 | Neutral       | 0.85 | -0.24 | Neutral       | 0.79  | -0.33         | Neutral       |
| 24 | p.Arg24Glu | 0.67  | -0.59 | Neutral       | 1.14 | 0.18  | Neutral       | 0.90  | -0.15         | Neutral       |
| 24 | p.Arg24Ala | 0.53  | -0.91 | Neutral       | 0.85 | -0.24 | Neutral       | 0.69  | -0.54         | Neutral       |
| 24 | p.Arg24Gly | 0.69  | -0.54 | Neutral       | 1.23 | 0.30  | Indeterminate | 0.96  | -0.06         | Neutral       |
| 24 | p.Arg24Val | 0.67  | -0.57 | Neutral       | 1.02 | 0.02  | Neutral       | 0.85  | -0.24         | Neutral       |
| 24 | p.Arg24Tyr | 0.66  | -0.61 | Neutral       | 1.14 | 0.19  | Neutral       | 0.90  | -0.16         | Neutral       |
| 24 | p.Arg24Cys | 0.84  | -0.25 | Neutral       | 0.75 | -0.42 | Neutral       | 0.79  | -0.33         | Neutral       |
| 24 | p.Arg24Trp | 0.95  | -0.07 | Neutral       | 1.12 | 0.16  | Neutral       | 1.04  | 0.05          | Neutral       |
| 24 | p.Arg24Phe | 0.82  | -0.29 | Neutral       | 0.94 | -0.09 | Neutral       | 0.88  | -0.19         | Neutral       |
| 25 | p.Val25Asn | 1.23  | 0.30  | Indeterminate |      |       | 1.23          | 0.30  | Indeterminate |               |
| 25 | p.Val25Lys | 1.86  | 0.89  | Indeterminate |      |       | 1.86          | 0.89  | Indeterminate |               |
| 25 | p.Val25Thr | 1.00  | 0.00  | Neutral       |      |       | 1.00          | 0.00  | Neutral       |               |
| 25 | p.Val25Arg | 1.37  | 0.45  | Indeterminate |      |       | 1.37          | 0.45  | Indeterminate |               |
| 25 | p.Val25Ser | 0.88  | -0.19 | Neutral       |      |       | 0.88          | -0.19 | Neutral       |               |
| 25 | p.Val25Ile | 0.83  | -0.27 | Neutral       |      |       | 0.83          | -0.27 | Neutral       |               |
| 25 | p.Val25Met | 2.08  | 1.06  | Indeterminate |      |       | 2.08          | 1.06  | Indeterminate |               |
| 25 | p.Val25His | 0.78  | -0.36 | Neutral       |      |       | 0.78          | -0.36 | Neutral       |               |
| 25 | p.Val25Gln | 0.76  | -0.39 | Neutral       |      |       | 0.76          | -0.39 | Neutral       |               |
| 25 | p.Val25Pro | 0.45  | -1.14 | Neutral       |      |       | 0.45          | -1.14 | Neutral       |               |
| 25 | p.Val25Leu | 0.59  | -0.76 | Neutral       |      |       | 0.59          | -0.76 | Neutral       |               |
| 25 | p.Val25Asp | 2.01  | 1.01  | Indeterminate |      |       | 2.01          | 1.01  | Indeterminate |               |
| 25 | p.Val25Glu | 0.89  | -0.18 | Neutral       |      |       | 0.89          | -0.18 | Neutral       |               |
| 25 | p.Val25Ala | 6.36  | 2.67  | Deleterious   |      |       | 6.36          | 2.67  | Deleterious   |               |
| 25 | p.Val25Gly | 2.04  | 1.03  | Indeterminate |      |       | 2.04          | 1.03  | Indeterminate |               |
| 25 | p.Val25Val | 1.00  | 0.00  | Neutral       |      |       | 1.00          | 0.00  | Neutral       |               |
| 25 | p.Val25Tyr | 2.88  | 1.52  | Deleterious   |      |       | 2.88          | 1.52  | Deleterious   |               |
| 25 | p.Val25Cys | 0.61  | -0.70 | Neutral       |      |       | 0.61          | -0.70 | Neutral       |               |
| 25 | p.Val25Trp | 1.21  | 0.27  | Indeterminate |      |       | 1.21          | 0.27  | Indeterminate |               |
| 25 | p.Val25Phe | 1.14  | 0.19  | Neutral       |      |       | 1.14          | 0.19  | Neutral       |               |
| 26 | p.Glu26Asn | 0.81  | -0.30 | Neutral       |      |       | 0.81          | -0.30 | Neutral       |               |
| 26 | p.Glu26Lys | 0.82  | -0.29 | Neutral       |      |       | 0.82          | -0.29 | Neutral       |               |
| 26 | p.Glu26Thr | 0.92  | -0.13 | Neutral       |      |       | 0.92          | -0.13 | Neutral       |               |
| 26 | p.Glu26Arg | 0.90  | -0.16 | Neutral       |      |       | 0.90          | -0.16 | Neutral       |               |
| 26 | p.Glu26Ser | 1.19  | 0.25  | Indeterminate |      |       | 1.19          | 0.25  | Indeterminate |               |
| 26 | p.Glu26Ile | 0.95  | -0.07 | Neutral       |      |       | 0.95          | -0.07 | Neutral       |               |
| 26 | p.Glu26Met | 0.86  | -0.21 | Neutral       |      |       | 0.86          | -0.21 | Neutral       |               |
| 26 | p.Glu26His | 1.07  | 0.09  | Neutral       |      |       | 1.07          | 0.09  | Neutral       |               |
| 26 | p.Glu26Gln | 1.05  | 0.07  | Neutral       |      |       | 1.05          | 0.07  | Neutral       |               |
| 26 | p.Glu26Pro | 1.06  | 0.08  | Neutral       |      |       | 1.06          | 0.08  | Neutral       |               |
| 26 | p.Glu26Leu | 0.84  | -0.25 | Neutral       |      |       | 0.84          | -0.25 | Neutral       |               |
| 26 | p.Glu26Asp | 1.00  | 0.00  | Neutral       |      |       | 1.00          | 0.00  | Neutral       |               |
| 26 | p.Glu26Glu | 1.00  | 0.00  | Neutral       |      |       | 1.00          | 0.00  | Neutral       |               |
| 26 | p.Glu26Ala | 1.07  | 0.10  | Neutral       |      |       | 1.07          | 0.10  | Neutral       |               |
| 26 | p.Glu26Gly | 1.00  | 0.01  | Neutral       |      |       | 1.00          | 0.01  | Neutral       |               |
| 26 | p.Glu26Val | 0.98  | -0.03 | Neutral       |      |       | 0.98          | -0.03 | Neutral       |               |
| 26 | p.Glu26Tyr | 1.12  | 0.16  | Neutral       |      |       | 1.12          | 0.16  | Neutral       |               |
| 26 | p.Glu26Cys | 0.95  | -0.08 | Neutral       |      |       | 0.95          | -0.08 | Neutral       |               |
| 26 | p.Glu26Trp | 0.99  | -0.01 | Neutral       |      |       | 0.99          | -0.01 | Neutral       |               |
| 26 | p.Glu26Phe | 1.04  | 0.05  | Neutral       |      |       | 1.04          | 0.05  | Neutral       |               |
| 27 | p.Glu27Asn | 0.36  | -1.47 | Neutral       | 0.99 | -0.01 | Neutral       | 0.68  | -0.56         | Neutral       |
| 27 | p.Glu27Lys | 0.94  | -0.09 | Neutral       | 0.99 | -0.02 | Neutral       | 0.96  | -0.05         | Neutral       |
| 27 | p.Glu27Thr | 1.69  | 0.76  | Indeterminate | 1.13 | 0.17  | Neutral       | 1.41  | 0.50          | Indeterminate |
| 27 | p.Glu27Arg | 0.95  | -0.08 | Neutral       | 1.09 | 0.13  | Neutral       | 1.02  | 0.03          | Neutral       |
| 27 | p.Glu27Ser | 0.76  | -0.40 | Neutral       | 0.99 | -0.02 | Neutral       | 0.87  | -0.20         | Neutral       |





|    |            |       |       |               |       |       |               |
|----|------------|-------|-------|---------------|-------|-------|---------------|
| 37 | p.Leu37Cys | 0.84  | -0.24 | Neutral       | 0.84  | -0.24 | Neutral       |
| 37 | p.Leu37Trp | 6.84  | 2.77  | Deleterious   | 6.84  | 2.77  | Deleterious   |
| 37 | p.Leu37Phe | 0.77  | -0.37 | Neutral       | 0.77  | -0.37 | Neutral       |
| 38 | p.Pro38Asn | 3.11  | 1.64  | Deleterious   | 3.11  | 1.64  | Deleterious   |
| 38 | p.Pro38Lys | 3.68  | 1.88  | Deleterious   | 3.68  | 1.88  | Deleterious   |
| 38 | p.Pro38Thr | 1.34  | 0.42  | Indeterminate | 1.34  | 0.42  | Indeterminate |
| 38 | p.Pro38Arg | 5.04  | 2.33  | Deleterious   | 5.04  | 2.33  | Deleterious   |
| 38 | p.Pro38Ser | 1.73  | 0.79  | Indeterminate | 1.73  | 0.79  | Indeterminate |
| 38 | p.Pro38Ile | 1.77  | 0.82  | Indeterminate | 1.77  | 0.82  | Indeterminate |
| 38 | p.Pro38Met | 2.30  | 1.20  | Deleterious   | 2.30  | 1.20  | Deleterious   |
| 38 | p.Pro38His | 3.80  | 1.92  | Deleterious   | 3.80  | 1.92  | Deleterious   |
| 38 | p.Pro38Gln | 4.08  | 2.03  | Deleterious   | 4.08  | 2.03  | Deleterious   |
| 38 | p.Pro38Pro | 1.00  | 0.00  | Neutral       | 1.00  | 0.00  | Neutral       |
| 38 | p.Pro38Leu | 3.22  | 1.69  | Deleterious   | 3.22  | 1.69  | Deleterious   |
| 38 | p.Pro38Asp | 20.44 | 4.35  | Deleterious   | 20.44 | 4.35  | Deleterious   |
| 38 | p.Pro38Glu | 2.65  | 1.41  | Deleterious   | 2.65  | 1.41  | Deleterious   |
| 38 | p.Pro38Ala | 5.59  | 2.48  | Deleterious   | 5.59  | 2.48  | Deleterious   |
| 38 | p.Pro38Gly | 0.99  | -0.02 | Neutral       | 0.99  | -0.02 | Neutral       |
| 38 | p.Pro38Val | 1.02  | 0.03  | Neutral       | 1.02  | 0.03  | Neutral       |
| 38 | p.Pro38Tyr | 3.40  | 1.77  | Deleterious   | 3.40  | 1.77  | Deleterious   |
| 38 | p.Pro38Cys | 0.75  | -0.41 | Neutral       | 0.75  | -0.41 | Neutral       |
| 38 | p.Pro38Trp | 31.11 | 4.96  | Deleterious   | 31.11 | 4.96  | Deleterious   |
| 38 | p.Pro38Phe | 4.51  | 2.17  | Deleterious   | 4.51  | 2.17  | Deleterious   |
| 39 | p.Asn39Asn | 1.00  | 0.00  | Neutral       | 1.00  | 0.00  | Neutral       |
| 39 | p.Asn39Lys | 2.13  | 1.09  | Deleterious   | 2.13  | 1.09  | Deleterious   |
| 39 | p.Asn39Thr | 0.63  | -0.66 | Neutral       | 0.63  | -0.66 | Neutral       |
| 39 | p.Asn39Arg | 1.12  | 0.16  | Neutral       | 1.12  | 0.16  | Neutral       |
| 39 | p.Asn39Ser | 1.17  | 0.22  | Neutral       | 1.17  | 0.22  | Neutral       |
| 39 | p.Asn39Ile | 1.45  | 0.53  | Indeterminate | 1.45  | 0.53  | Indeterminate |
| 39 | p.Asn39Met | 2.20  | 1.14  | Deleterious   | 2.20  | 1.14  | Deleterious   |
| 39 | p.Asn39His | 0.71  | -0.50 | Neutral       | 0.71  | -0.50 | Neutral       |
| 39 | p.Asn39Gln | 0.93  | -0.10 | Neutral       | 0.93  | -0.10 | Neutral       |
| 39 | p.Asn39Pro | 14.46 | 3.85  | Deleterious   | 14.46 | 3.85  | Deleterious   |
| 39 | p.Asn39Leu | 4.17  | 2.06  | Deleterious   | 4.17  | 2.06  | Deleterious   |
| 39 | p.Asn39Asp | 1.04  | 0.06  | Neutral       | 1.04  | 0.06  | Neutral       |
| 39 | p.Asn39Glu | 1.18  | 0.24  | Indeterminate | 1.18  | 0.24  | Indeterminate |
| 39 | p.Asn39Ala | 1.30  | 0.37  | Indeterminate | 1.30  | 0.37  | Indeterminate |
| 39 | p.Asn39Gly | 0.98  | -0.03 | Neutral       | 0.98  | -0.03 | Neutral       |
| 39 | p.Asn39Val | 1.33  | 0.41  | Indeterminate | 1.33  | 0.41  | Indeterminate |
| 39 | p.Asn39Tyr | 0.89  | -0.17 | Neutral       | 0.89  | -0.17 | Neutral       |
| 39 | p.Asn39Cys | 4.55  | 2.19  | Deleterious   | 4.55  | 2.19  | Deleterious   |
| 39 | p.Asn39Trp | 1.64  | 0.71  | Indeterminate | 1.64  | 0.71  | Indeterminate |
| 39 | p.Asn39Phe | 8.47  | 3.08  | Deleterious   | 8.47  | 3.08  | Deleterious   |
| 40 | p.Ala40Asn | 1.37  | 0.45  | Indeterminate | 1.37  | 0.45  | Indeterminate |
| 40 | p.Ala40Lys | 1.11  | 0.15  | Neutral       | 1.11  | 0.15  | Neutral       |
| 40 | p.Ala40Thr | 7.75  | 2.95  | Deleterious   | 7.75  | 2.95  | Deleterious   |
| 40 | p.Ala40Arg | 1.00  | 0.00  | Neutral       | 1.00  | 0.00  | Neutral       |
| 40 | p.Ala40Ser | 0.73  | -0.46 | Neutral       | 0.73  | -0.46 | Neutral       |
| 40 | p.Ala40Ile | 1.12  | 0.16  | Neutral       | 1.12  | 0.16  | Neutral       |
| 40 | p.Ala40Met | 0.60  | -0.73 | Neutral       | 0.60  | -0.73 | Neutral       |
| 40 | p.Ala40His | 0.74  | -0.44 | Neutral       | 0.74  | -0.44 | Neutral       |
| 40 | p.Ala40Gln | 0.61  | -0.72 | Neutral       | 0.61  | -0.72 | Neutral       |
| 40 | p.Ala40Pro | 1.50  | 0.58  | Indeterminate | 1.50  | 0.58  | Indeterminate |
| 40 | p.Ala40Leu | 3.93  | 1.97  | Deleterious   | 3.93  | 1.97  | Deleterious   |
| 40 | p.Ala40Asp | 1.66  | 0.73  | Indeterminate | 1.66  | 0.73  | Indeterminate |
| 40 | p.Ala40Glu | 0.79  | -0.35 | Neutral       | 0.79  | -0.35 | Neutral       |
| 40 | p.Ala40Ala | 1.00  | 0.00  | Neutral       | 1.00  | 0.00  | Neutral       |
| 40 | p.Ala40Gly | 1.03  | 0.05  | Neutral       | 1.03  | 0.05  | Neutral       |
| 40 | p.Ala40Val | 1.38  | 0.47  | Indeterminate | 1.38  | 0.47  | Indeterminate |
| 40 | p.Ala40Tyr | 0.73  | -0.44 | Neutral       | 0.73  | -0.44 | Neutral       |
| 40 | p.Ala40Cys | 1.01  | 0.01  | Neutral       | 1.01  | 0.01  | Neutral       |
| 40 | p.Ala40Trp | 1.17  | 0.22  | Neutral       | 1.17  | 0.22  | Neutral       |
| 40 | p.Ala40Phe | 1.12  | 0.16  | Neutral       | 1.12  | 0.16  | Neutral       |
| 41 | p.Pro41Asn | 0.92  | -0.12 | Neutral       | 0.92  | -0.12 | Neutral       |
| 41 | p.Pro41Lys | 1.28  | 0.35  | Indeterminate | 1.28  | 0.35  | Indeterminate |
| 41 | p.Pro41Thr | 1.03  | 0.04  | Neutral       | 1.03  | 0.04  | Neutral       |
| 41 | p.Pro41Arg | 2.29  | 1.20  | Deleterious   | 2.29  | 1.20  | Deleterious   |
| 41 | p.Pro41Ser | 0.97  | -0.05 | Neutral       | 0.97  | -0.05 | Neutral       |
| 41 | p.Pro41Ile | 1.61  | 0.68  | Indeterminate | 1.61  | 0.68  | Indeterminate |
| 41 | p.Pro41Met | 0.78  | -0.37 | Neutral       | 0.78  | -0.37 | Neutral       |
| 41 | p.Pro41His | 1.79  | 0.84  | Indeterminate | 1.79  | 0.84  | Indeterminate |
| 41 | p.Pro41Gln | 1.29  | 0.37  | Indeterminate | 1.29  | 0.37  | Indeterminate |
| 41 | p.Pro41Pro | 1.00  | 0.00  | Neutral       | 1.00  | 0.00  | Neutral       |
| 41 | p.Pro41Leu | 0.79  | -0.34 | Neutral       | 0.79  | -0.34 | Neutral       |
| 41 | p.Pro41Asp | 1.28  | 0.35  | Indeterminate | 1.28  | 0.35  | Indeterminate |
| 41 | p.Pro41Glu | 0.90  | -0.15 | Neutral       | 0.90  | -0.15 | Neutral       |
| 41 | p.Pro41Ala | 1.00  | 0.01  | Neutral       | 1.00  | 0.01  | Neutral       |
| 41 | p.Pro41Gly | 1.06  | 0.09  | Neutral       | 1.06  | 0.09  | Neutral       |
| 41 | p.Pro41Val | 1.09  | 0.13  | Neutral       | 1.09  | 0.13  | Neutral       |
| 41 | p.Pro41Tyr | 2.10  | 1.07  | Indeterminate | 2.10  | 1.07  | Indeterminate |
| 41 | p.Pro41Cys | 1.32  | 0.40  | Indeterminate | 1.32  | 0.40  | Indeterminate |
| 41 | p.Pro41Trp | 1.43  | 0.52  | Indeterminate | 1.43  | 0.52  | Indeterminate |
| 41 | p.Pro41Phe | 1.52  | 0.61  | Indeterminate | 1.52  | 0.61  | Indeterminate |
| 42 | p.Asn42Asn | 1.00  | 0.00  | Neutral       | 1.00  | 0.00  | Neutral       |
| 42 | p.Asn42Lys | 12.54 | 3.65  | Deleterious   | 12.54 | 3.65  | Deleterious   |
| 42 | p.Asn42Thr | 1.32  | 0.41  | Indeterminate | 1.32  | 0.41  | Indeterminate |
| 42 | p.Asn42Arg | 11.65 | 3.54  | Deleterious   | 11.65 | 3.54  | Deleterious   |
| 42 | p.Asn42Ser | 1.22  | 0.29  | Indeterminate | 1.22  | 0.29  | Indeterminate |
| 42 | p.Asn42Ile | 11.57 | 3.53  | Deleterious   | 11.57 | 3.53  | Deleterious   |
| 42 | p.Asn42Met | 9.77  | 3.29  | Deleterious   | 9.77  | 3.29  | Deleterious   |
| 42 | p.Asn42His | 7.33  | 2.87  | Deleterious   | 7.33  | 2.87  | Deleterious   |
| 42 | p.Asn42Gln | 7.10  | 2.83  | Deleterious   | 7.10  | 2.83  | Deleterious   |
| 42 | p.Asn42Pro | 10.83 | 3.44  | Deleterious   | 10.83 | 3.44  | Deleterious   |
| 42 | p.Asn42Leu | 11.43 | 3.51  | Deleterious   | 11.43 | 3.51  | Deleterious   |
| 42 | p.Asn42Asp | 1.61  | 0.69  | Indeterminate | 1.61  | 0.69  | Indeterminate |
| 42 | p.Asn42Glu | 12.48 | 3.64  | Deleterious   | 12.48 | 3.64  | Deleterious   |
| 42 | p.Asn42Ala | 1.15  | 0.20  | Neutral       | 1.15  | 0.20  | Neutral       |
| 42 | p.Asn42Gly | 0.94  | -0.09 | Neutral       | 0.94  | -0.09 | Neutral       |
| 42 | p.Asn42Val | 9.99  | 3.32  | Deleterious   | 9.99  | 3.32  | Deleterious   |
| 42 | p.Asn42Tyr | 11.87 | 3.57  | Deleterious   | 11.87 | 3.57  | Deleterious   |
| 42 | p.Asn42Cys | 1.48  | 0.57  | Indeterminate | 1.48  | 0.57  | Indeterminate |
| 42 | p.Asn42Trp | 14.65 | 3.87  | Deleterious   | 14.65 | 3.87  | Deleterious   |
| 42 | p.Asn42Phe | 12.61 | 3.66  | Deleterious   | 12.61 | 3.66  | Deleterious   |
| 43 | p.Ser43Asn | 1.10  | 0.14  | Neutral       | 1.10  | 0.14  | Neutral       |
| 43 | p.Ser43Lys | 1.04  | 0.06  | Neutral       | 1.04  | 0.06  | Neutral       |
| 43 | p.Ser43Thr | 0.97  | -0.04 | Neutral       | 0.97  | -0.04 | Neutral       |



|    |            |       |       |               |      |      |               |       |               |               |
|----|------------|-------|-------|---------------|------|------|---------------|-------|---------------|---------------|
| 43 | p.Ser43Arg | 0.99  | -0.01 | Neutral       |      |      | 0.99          | -0.01 | Neutral       |               |
| 43 | p.Ser43Ser | 1.00  | 0.00  | Neutral       |      |      | 1.00          | 0.00  | Neutral       |               |
| 43 | p.Ser43Ile | 1.25  | 0.32  | Indeterminate |      |      | 1.25          | 0.32  | Indeterminate |               |
| 43 | p.Ser43Met | 1.09  | 0.13  | Neutral       |      |      | 1.09          | 0.13  | Neutral       |               |
| 43 | p.Ser43His | 1.00  | -0.01 | Neutral       |      |      | 1.00          | -0.01 | Neutral       |               |
| 43 | p.Ser43Gln | 1.00  | 0.00  | Neutral       |      |      | 1.00          | 0.00  | Neutral       |               |
| 43 | p.Ser43Pro | 0.99  | -0.01 | Neutral       |      |      | 0.99          | -0.01 | Neutral       |               |
| 43 | p.Ser43Leu | 1.06  | 0.08  | Neutral       |      |      | 1.06          | 0.08  | Neutral       |               |
| 43 | p.Ser43Asp | 1.09  | 0.12  | Neutral       |      |      | 1.09          | 0.12  | Neutral       |               |
| 43 | p.Ser43Glu | 1.02  | 0.03  | Neutral       |      |      | 1.02          | 0.03  | Neutral       |               |
| 43 | p.Ser43Ala | 0.97  | -0.05 | Neutral       |      |      | 0.97          | -0.05 | Neutral       |               |
| 43 | p.Ser43Gly | 0.94  | -0.08 | Neutral       |      |      | 0.94          | -0.08 | Neutral       |               |
| 43 | p.Ser43Val | 1.09  | 0.13  | Neutral       |      |      | 1.09          | 0.13  | Neutral       |               |
| 43 | p.Ser43Tyr | 1.07  | 0.10  | Neutral       |      |      | 1.07          | 0.10  | Neutral       |               |
| 43 | p.Ser43Cys | 1.06  | 0.08  | Neutral       |      |      | 1.06          | 0.08  | Neutral       |               |
| 43 | p.Ser43Trp | 1.11  | 0.15  | Neutral       |      |      | 1.11          | 0.15  | Neutral       |               |
| 43 | p.Ser43Phe | 1.05  | 0.08  | Neutral       |      |      | 1.05          | 0.08  | Neutral       |               |
| 44 | p.Tyr44Asn | 1.21  | 0.28  | Indeterminate |      |      | 1.21          | 0.28  | Indeterminate |               |
| 44 | p.Tyr44Lys | 1.21  | 0.27  | Indeterminate |      |      | 1.21          | 0.27  | Indeterminate |               |
| 44 | p.Tyr44Thr | 0.99  | -0.02 | Neutral       |      |      | 0.99          | -0.02 | Neutral       |               |
| 44 | p.Tyr44Arg | 1.03  | 0.04  | Neutral       |      |      | 1.03          | 0.04  | Neutral       |               |
| 44 | p.Tyr44Ser | 1.09  | 0.12  | Neutral       |      |      | 1.09          | 0.12  | Neutral       |               |
| 44 | p.Tyr44Ile | 1.05  | 0.07  | Neutral       |      |      | 1.05          | 0.07  | Neutral       |               |
| 44 | p.Tyr44Met | 1.09  | 0.12  | Neutral       |      |      | 1.09          | 0.12  | Neutral       |               |
| 44 | p.Tyr44His | 1.10  | 0.14  | Neutral       |      |      | 1.10          | 0.14  | Neutral       |               |
| 44 | p.Tyr44Gln | 1.28  | 0.36  | Indeterminate |      |      | 1.28          | 0.36  | Indeterminate |               |
| 44 | p.Tyr44Pro | 2.30  | 1.20  | Deleterious   |      |      | 2.30          | 1.20  | Deleterious   |               |
| 44 | p.Tyr44Leu | 1.09  | 0.13  | Neutral       |      |      | 1.09          | 0.13  | Neutral       |               |
| 44 | p.Tyr44Asp | 1.24  | 0.31  | Indeterminate |      |      | 1.24          | 0.31  | Indeterminate |               |
| 44 | p.Tyr44Glu | 1.40  | 0.48  | Indeterminate |      |      | 1.40          | 0.48  | Indeterminate |               |
| 44 | p.Tyr44Ala | 1.82  | 0.87  | Indeterminate |      |      | 1.82          | 0.87  | Indeterminate |               |
| 44 | p.Tyr44Gly | 1.38  | 0.46  | Indeterminate |      |      | 1.38          | 0.46  | Indeterminate |               |
| 44 | p.Tyr44Val | 1.09  | 0.13  | Neutral       |      |      | 1.09          | 0.13  | Neutral       |               |
| 44 | p.Tyr44Tyr | 1.00  | 0.00  | Neutral       |      |      | 1.00          | 0.00  | Neutral       |               |
| 44 | p.Tyr44Cys | 0.97  | -0.05 | Neutral       |      |      | 0.97          | -0.05 | Neutral       |               |
| 44 | p.Tyr44Trp | 1.10  | 0.14  | Neutral       |      |      | 1.10          | 0.14  | Neutral       |               |
| 44 | p.Tyr44Phe | 1.05  | 0.07  | Neutral       |      |      | 1.05          | 0.07  | Neutral       |               |
| 45 | p.Gly45Asn | 0.71  | -0.49 | Neutral       | 1.16 | 0.21 | Neutral       | 0.93  | -0.10         | Neutral       |
| 45 | p.Gly45Lys | 1.34  | 0.42  | Indeterminate | 1.14 | 0.19 | Neutral       | 1.24  | 0.31          | Indeterminate |
| 45 | p.Gly45Thr | 0.64  | -0.64 | Neutral       | 1.13 | 0.17 | Neutral       | 0.88  | -0.18         | Neutral       |
| 45 | p.Gly45Arg | 0.96  | -0.05 | Neutral       | 1.11 | 0.16 | Neutral       | 1.04  | 0.06          | Neutral       |
| 45 | p.Gly45Ser | 1.93  | 0.95  | Indeterminate | 1.09 | 0.12 | Neutral       | 1.51  | 0.59          | Indeterminate |
| 45 | p.Gly45Ile | 1.92  | 0.94  | Indeterminate | 1.20 | 0.27 | Indeterminate | 1.56  | 0.65          | Indeterminate |
| 45 | p.Gly45Met | 1.24  | 0.31  | Indeterminate | 1.12 | 0.16 | Neutral       | 1.18  | 0.24          | Neutral       |
| 45 | p.Gly45His | 1.10  | 0.14  | Neutral       | 1.12 | 0.17 | Neutral       | 1.11  | 0.15          | Neutral       |
| 45 | p.Gly45Gln | 0.72  | -0.48 | Neutral       | 1.02 | 0.04 | Neutral       | 0.87  | -0.20         | Neutral       |
| 45 | p.Gly45Pro | 49.14 | 5.62  | Deleterious   | 4.40 | 2.14 | Deleterious   | 26.77 | 4.74          | Deleterious   |
| 45 | p.Gly45Leu | 1.15  | 0.20  | Neutral       | 1.11 | 0.15 | Neutral       | 1.13  | 0.17          | Neutral       |
| 45 | p.Gly45Asp | 0.71  | -0.48 | Neutral       | 1.05 | 0.07 | Neutral       | 0.88  | -0.18         | Neutral       |
| 45 | p.Gly45Glu | 1.09  | 0.12  | Neutral       | 1.08 | 0.11 | Neutral       | 1.08  | 0.11          | Neutral       |
| 45 | p.Gly45Ala | 0.63  | -0.66 | Neutral       | 1.13 | 0.18 | Neutral       | 0.88  | -0.18         | Neutral       |
| 45 | p.Gly45Gly | 1.00  | 0.00  | Neutral       | 1.00 | 0.00 | Neutral       | 1.00  | 0.00          | Neutral       |
| 45 | p.Gly45Val | 1.91  | 0.93  | Indeterminate | 1.27 | 0.34 | Indeterminate | 1.59  | 0.67          | Indeterminate |
| 45 | p.Gly45Tyr | 0.73  | -0.46 | Neutral       | 1.26 | 0.33 | Indeterminate | 0.99  | -0.01         | Neutral       |
| 45 | p.Gly45Cys | 0.85  | -0.23 | Neutral       | 1.09 | 0.13 | Neutral       | 0.97  | -0.04         | Neutral       |
| 45 | p.Gly45Trp | 1.04  | 0.05  | Neutral       | 1.24 | 0.31 | Indeterminate | 1.14  | 0.19          | Neutral       |
| 45 | p.Gly45Phe | 0.90  | -0.16 | Neutral       | 1.02 | 0.03 | Neutral       | 0.96  | -0.06         | Neutral       |
| 46 | p.Arg46Asn | 0.92  | -0.13 | Neutral       |      |      | 0.92          | -0.13 | Neutral       |               |
| 46 | p.Arg46Lys | 0.79  | -0.34 | Neutral       |      |      | 0.79          | -0.34 | Neutral       |               |
| 46 | p.Arg46Thr | 2.61  | 1.38  | Deleterious   |      |      | 2.61          | 1.38  | Deleterious   |               |
| 46 | p.Arg46Arg | 1.00  | 0.00  | Neutral       |      |      | 1.00          | 0.00  | Neutral       |               |
| 46 | p.Arg46Ser | 0.85  | -0.23 | Neutral       |      |      | 0.85          | -0.23 | Neutral       |               |
| 46 | p.Arg46Ile | 3.54  | 1.82  | Deleterious   |      |      | 3.54          | 1.82  | Deleterious   |               |
| 46 | p.Arg46Met | 1.31  | 0.39  | Indeterminate |      |      | 1.31          | 0.39  | Indeterminate |               |
| 46 | p.Arg46His | 0.79  | -0.34 | Neutral       |      |      | 0.79          | -0.34 | Neutral       |               |
| 46 | p.Arg46Gln | 1.54  | 0.62  | Indeterminate |      |      | 1.54          | 0.62  | Indeterminate |               |
| 46 | p.Arg46Pro | 17.80 | 4.15  | Deleterious   |      |      | 17.80         | 4.15  | Deleterious   |               |
| 46 | p.Arg46Leu | 1.44  | 0.53  | Indeterminate |      |      | 1.44          | 0.53  | Indeterminate |               |
| 46 | p.Arg46Asp | 5.92  | 2.56  | Deleterious   |      |      | 5.92          | 2.56  | Deleterious   |               |
| 46 | p.Arg46Glu | 3.02  | 1.59  | Deleterious   |      |      | 3.02          | 1.59  | Deleterious   |               |
| 46 | p.Arg46Ala | 1.39  | 0.48  | Indeterminate |      |      | 1.39          | 0.48  | Indeterminate |               |
| 46 | p.Arg46Gly | 1.36  | 0.44  | Indeterminate |      |      | 1.36          | 0.44  | Indeterminate |               |
| 46 | p.Arg46Val | 1.88  | 0.91  | Indeterminate |      |      | 1.88          | 0.91  | Indeterminate |               |
| 46 | p.Arg46Tyr | 1.75  | 0.81  | Indeterminate |      |      | 1.75          | 0.81  | Indeterminate |               |
| 46 | p.Arg46Cys | 1.36  | 0.44  | Indeterminate |      |      | 1.36          | 0.44  | Indeterminate |               |
| 46 | p.Arg46Trp | 0.81  | -0.30 | Neutral       |      |      | 0.81          | -0.30 | Neutral       |               |
| 46 | p.Arg46Phe | 1.04  | 0.05  | Neutral       |      |      | 1.04          | 0.05  | Neutral       |               |
| 47 | p.Arg47Asn | 0.91  | -0.13 | Neutral       |      |      | 0.91          | -0.13 | Neutral       |               |
| 47 | p.Arg47Lys | 0.99  | -0.01 | Neutral       |      |      | 0.99          | -0.01 | Neutral       |               |
| 47 | p.Arg47Thr | 0.99  | -0.02 | Neutral       |      |      | 0.99          | -0.02 | Neutral       |               |
| 47 | p.Arg47Arg | 1.00  | 0.00  | Neutral       |      |      | 1.00          | 0.00  | Neutral       |               |
| 47 | p.Arg47Ser | 1.32  | 0.41  | Indeterminate |      |      | 1.32          | 0.41  | Indeterminate |               |
| 47 | p.Arg47Ile | 1.04  | 0.05  | Neutral       |      |      | 1.04          | 0.05  | Neutral       |               |
| 47 | p.Arg47Met | 1.06  | 0.08  | Neutral       |      |      | 1.06          | 0.08  | Neutral       |               |
| 47 | p.Arg47His | 1.06  | 0.09  | Neutral       |      |      | 1.06          | 0.09  | Neutral       |               |
| 47 | p.Arg47Gln | 1.50  | 0.59  | Indeterminate |      |      | 1.50          | 0.59  | Indeterminate |               |
| 47 | p.Arg47Pro | 1.60  | 0.67  | Indeterminate |      |      | 1.60          | 0.67  | Indeterminate |               |
| 47 | p.Arg47Leu | 0.86  | -0.21 | Neutral       |      |      | 0.86          | -0.21 | Neutral       |               |
| 47 | p.Arg47Asp | 3.53  | 1.82  | Deleterious   |      |      | 3.53          | 1.82  | Deleterious   |               |
| 47 | p.Arg47Glu | 1.27  | 0.35  | Indeterminate |      |      | 1.27          | 0.35  | Indeterminate |               |
| 47 | p.Arg47Ala | 0.99  | -0.01 | Neutral       |      |      | 0.99          | -0.01 | Neutral       |               |
| 47 | p.Arg47Gly | 1.42  | 0.51  | Indeterminate |      |      | 1.42          | 0.51  | Indeterminate |               |
| 47 | p.Arg47Val | 0.97  | -0.04 | Neutral       |      |      | 0.97          | -0.04 | Neutral       |               |
| 47 | p.Arg47Tyr | 1.14  | 0.19  | Neutral       |      |      | 1.14          | 0.19  | Neutral       |               |
| 47 | p.Arg47Cys | 0.89  | -0.18 | Neutral       |      |      | 0.89          | -0.18 | Neutral       |               |
| 47 | p.Arg47Trp | 1.20  | 0.26  | Indeterminate |      |      | 1.20          | 0.26  | Indeterminate |               |
| 47 | p.Arg47Phe | 0.89  | -0.17 | Neutral       |      |      | 0.89          | -0.17 | Neutral       |               |
| 48 | p.Pro48Asn | 13.23 | 3.73  | Deleterious   |      |      | 13.23         | 3.73  | Deleterious   |               |
| 48 | p.Pro48Lys | 15.42 | 3.95  | Deleterious   |      |      | 15.42         | 3.95  | Deleterious   |               |
| 48 | p.Pro48Thr | 2.13  | 1.09  | Deleterious   |      |      | 2.13          | 1.09  | Deleterious   |               |
| 48 | p.Pro48Arg | 13.40 | 3.74  | Deleterious   |      |      | 13.40         | 3.74  | Deleterious   |               |
| 48 | p.Pro48Ser | 1.50  | 0.58  | Indeterminate |      |      | 1.50          | 0.58  | Indeterminate |               |
| 48 | p.Pro48Ile | 7.83  | 2.97  | Deleterious   |      |      | 7.83          | 2.97  | Deleterious   |               |
| 48 | p.Pro48Met | 11.91 | 3.57  | Deleterious   |      |      | 11.91         | 3.57  | Deleterious   |               |
| 48 | p.Pro48His | 11.54 | 3.53  | Deleterious   |      |      | 11.54         | 3.53  | Deleterious   |               |
| 48 | p.Pro48Gln | 14.93 | 3.90  | Deleterious   |      |      | 14.93         | 3.90  | Deleterious   |               |

|    |            |       |       |               |       |       |               |
|----|------------|-------|-------|---------------|-------|-------|---------------|
| 48 | p.Pro48Pro | 1.00  | 0.00  | Neutral       | 1.00  | 0.00  | Neutral       |
| 48 | p.Pro48Leu | 17.50 | 4.13  | Deleterious   | 17.50 | 4.13  | Deleterious   |
| 48 | p.Pro48Asp | 17.91 | 4.16  | Deleterious   | 17.91 | 4.16  | Deleterious   |
| 48 | p.Pro48Glu | 16.63 | 4.06  | Deleterious   | 16.63 | 4.06  | Deleterious   |
| 48 | p.Pro48Ala | 0.75  | -0.42 | Neutral       | 0.75  | -0.42 | Neutral       |
| 48 | p.Pro48Gly | 2.08  | 1.05  | Indeterminate | 2.08  | 1.05  | Indeterminate |
| 48 | p.Pro48Val | 2.16  | 1.11  | Deleterious   | 2.16  | 1.11  | Deleterious   |
| 48 | p.Pro48Tyr | 18.13 | 4.18  | Deleterious   | 18.13 | 4.18  | Deleterious   |
| 48 | p.Pro48Cys | 2.37  | 1.25  | Deleterious   | 2.37  | 1.25  | Deleterious   |
| 48 | p.Pro48Trp | 17.96 | 4.17  | Deleterious   | 17.96 | 4.17  | Deleterious   |
| 48 | p.Pro48Phe | 15.06 | 3.91  | Deleterious   | 15.06 | 3.91  | Deleterious   |
| 49 | p.Ile49Asn | 6.56  | 2.71  | Deleterious   | 6.56  | 2.71  | Deleterious   |
| 49 | p.Ile49Lys | 8.49  | 3.09  | Deleterious   | 8.49  | 3.09  | Deleterious   |
| 49 | p.Ile49Thr | 2.32  | 1.21  | Deleterious   | 2.32  | 1.21  | Deleterious   |
| 49 | p.Ile49Arg | 7.54  | 2.91  | Deleterious   | 7.54  | 2.91  | Deleterious   |
| 49 | p.Ile49Ser | 4.51  | 2.17  | Deleterious   | 4.51  | 2.17  | Deleterious   |
| 49 | p.Ile49Ile | 1.00  | 0.00  | Neutral       | 1.00  | 0.00  | Neutral       |
| 49 | p.Ile49Met | 1.09  | 0.12  | Neutral       | 1.09  | 0.12  | Neutral       |
| 49 | p.Ile49His | 4.93  | 2.30  | Deleterious   | 4.93  | 2.30  | Deleterious   |
| 49 | p.Ile49Gln | 3.98  | 1.99  | Deleterious   | 3.98  | 1.99  | Deleterious   |
| 49 | p.Ile49Pro | 7.18  | 2.84  | Deleterious   | 7.18  | 2.84  | Deleterious   |
| 49 | p.Ile49Leu | 0.97  | -0.05 | Neutral       | 0.97  | -0.05 | Neutral       |
| 49 | p.Ile49Asp | 9.18  | 3.20  | Deleterious   | 9.18  | 3.20  | Deleterious   |
| 49 | p.Ile49Glu | 8.40  | 3.07  | Deleterious   | 8.40  | 3.07  | Deleterious   |
| 49 | p.Ile49Ala | 2.27  | 1.19  | Deleterious   | 2.27  | 1.19  | Deleterious   |
| 49 | p.Ile49Gly | 8.88  | 3.15  | Deleterious   | 8.88  | 3.15  | Deleterious   |
| 49 | p.Ile49Val | 1.09  | 0.12  | Neutral       | 1.09  | 0.12  | Neutral       |
| 49 | p.Ile49Tyr | 6.77  | 2.76  | Deleterious   | 6.77  | 2.76  | Deleterious   |
| 49 | p.Ile49Cys | 1.85  | 0.89  | Indeterminate | 1.85  | 0.89  | Indeterminate |
| 49 | p.Ile49Trp | 7.82  | 2.97  | Deleterious   | 7.82  | 2.97  | Deleterious   |
| 49 | p.Ile49Phe | 2.33  | 1.22  | Deleterious   | 2.33  | 1.22  | Deleterious   |
| 50 | p.Gln50Asn | 1.33  | 0.41  | Indeterminate | 1.33  | 0.41  | Indeterminate |
| 50 | p.Gln50Lys | 12.74 | 3.67  | Deleterious   | 12.74 | 3.67  | Deleterious   |
| 50 | p.Gln50Thr | 1.26  | 0.33  | Indeterminate | 1.26  | 0.33  | Indeterminate |
| 50 | p.Gln50Arg | 17.01 | 4.09  | Deleterious   | 17.01 | 4.09  | Deleterious   |
| 50 | p.Gln50Ser | 1.18  | 0.24  | Indeterminate | 1.18  | 0.24  | Indeterminate |
| 50 | p.Gln50Ile | 4.65  | 2.22  | Deleterious   | 4.65  | 2.22  | Deleterious   |
| 50 | p.Gln50Met | 1.04  | 0.05  | Neutral       | 1.04  | 0.05  | Neutral       |
| 50 | p.Gln50His | 4.31  | 2.11  | Deleterious   | 4.31  | 2.11  | Deleterious   |
| 50 | p.Gln50Gln | 1.00  | 0.00  | Neutral       | 1.00  | 0.00  | Neutral       |
| 50 | p.Gln50Pro | 18.09 | 4.18  | Deleterious   | 18.09 | 4.18  | Deleterious   |
| 50 | p.Gln50Leu | 1.87  | 0.90  | Indeterminate | 1.87  | 0.90  | Indeterminate |
| 50 | p.Gln50Asp | 6.89  | 2.78  | Deleterious   | 6.89  | 2.78  | Deleterious   |
| 50 | p.Gln50Glu | 1.05  | 0.08  | Neutral       | 1.05  | 0.08  | Neutral       |
| 50 | p.Gln50Ala | 1.36  | 0.45  | Indeterminate | 1.36  | 0.45  | Indeterminate |
| 50 | p.Gln50Gly | 1.47  | 0.55  | Indeterminate | 1.47  | 0.55  | Indeterminate |
| 50 | p.Gln50Val | 3.95  | 1.98  | Deleterious   | 3.95  | 1.98  | Deleterious   |
| 50 | p.Gln50Tyr | 16.89 | 4.08  | Deleterious   | 16.89 | 4.08  | Deleterious   |
| 50 | p.Gln50Cys | 1.85  | 0.89  | Indeterminate | 1.85  | 0.89  | Indeterminate |
| 50 | p.Gln50Trp | 14.91 | 3.90  | Deleterious   | 14.91 | 3.90  | Deleterious   |
| 50 | p.Gln50Phe | 13.94 | 3.80  | Deleterious   | 13.94 | 3.80  | Deleterious   |
| 51 | p.Val51Asn | 2.32  | 1.21  | Deleterious   | 2.32  | 1.21  | Deleterious   |
| 51 | p.Val51Lys | 33.67 | 5.07  | Deleterious   | 33.67 | 5.07  | Deleterious   |
| 51 | p.Val51Thr | 0.95  | -0.08 | Neutral       | 0.95  | -0.08 | Neutral       |
| 51 | p.Val51Arg | 35.63 | 5.16  | Deleterious   | 35.63 | 5.16  | Deleterious   |
| 51 | p.Val51Ser | 0.75  | -0.42 | Neutral       | 0.75  | -0.42 | Neutral       |
| 51 | p.Val51Ile | 1.28  | 0.35  | Indeterminate | 1.28  | 0.35  | Indeterminate |
| 51 | p.Val51Met | 2.48  | 1.31  | Deleterious   | 2.48  | 1.31  | Deleterious   |
| 51 | p.Val51His | 19.51 | 4.29  | Deleterious   | 19.51 | 4.29  | Deleterious   |
| 51 | p.Val51Gln | 3.55  | 1.83  | Deleterious   | 3.55  | 1.83  | Deleterious   |
| 51 | p.Val51Pro | 22.42 | 4.49  | Deleterious   | 22.42 | 4.49  | Deleterious   |
| 51 | p.Val51Leu | 1.07  | 0.10  | Neutral       | 1.07  | 0.10  | Neutral       |
| 51 | p.Val51Asp | 20.68 | 4.37  | Deleterious   | 20.68 | 4.37  | Deleterious   |
| 51 | p.Val51Glu | 23.51 | 4.56  | Deleterious   | 23.51 | 4.56  | Deleterious   |
| 51 | p.Val51Ala | 0.57  | -0.82 | Neutral       | 0.57  | -0.82 | Neutral       |
| 51 | p.Val51Gly | 1.00  | 0.00  | Neutral       | 1.00  | 0.00  | Neutral       |
| 51 | p.Val51Val | 1.00  | 0.00  | Neutral       | 1.00  | 0.00  | Neutral       |
| 51 | p.Val51Tyr | 11.39 | 3.51  | Deleterious   | 11.39 | 3.51  | Deleterious   |
| 51 | p.Val51Cys | 0.95  | -0.08 | Neutral       | 0.95  | -0.08 | Neutral       |
| 51 | p.Val51Trp | 24.18 | 4.60  | Deleterious   | 24.18 | 4.60  | Deleterious   |
| 51 | p.Val51Phe | 8.55  | 3.10  | Deleterious   | 8.55  | 3.10  | Deleterious   |
| 52 | p.Met52Asn | 1.75  | 0.81  | Indeterminate | 1.75  | 0.81  | Indeterminate |
| 52 | p.Met52Lys | 2.56  | 1.36  | Deleterious   | 2.56  | 1.36  | Deleterious   |
| 52 | p.Met52Thr | 1.16  | 0.21  | Neutral       | 1.16  | 0.21  | Neutral       |
| 52 | p.Met52Arg | 2.66  | 1.41  | Deleterious   | 2.66  | 1.41  | Deleterious   |
| 52 | p.Met52Ser | 1.03  | 0.04  | Neutral       | 1.03  | 0.04  | Neutral       |
| 52 | p.Met52Ile | 1.42  | 0.51  | Indeterminate | 1.42  | 0.51  | Indeterminate |
| 52 | p.Met52Met | 1.00  | 0.00  | Neutral       | 1.00  | 0.00  | Neutral       |
| 52 | p.Met52His | 1.54  | 0.62  | Indeterminate | 1.54  | 0.62  | Indeterminate |
| 52 | p.Met52Gln | 1.22  | 0.29  | Indeterminate | 1.22  | 0.29  | Indeterminate |
| 52 | p.Met52Pro | 2.22  | 1.15  | Deleterious   | 2.22  | 1.15  | Deleterious   |
| 52 | p.Met52Leu | 1.05  | 0.08  | Neutral       | 1.05  | 0.08  | Neutral       |
| 52 | p.Met52Asp | 2.54  | 1.34  | Deleterious   | 2.54  | 1.34  | Deleterious   |
| 52 | p.Met52Glu | 2.04  | 1.03  | Indeterminate | 2.04  | 1.03  | Indeterminate |
| 52 | p.Met52Ala | 1.03  | 0.04  | Neutral       | 1.03  | 0.04  | Neutral       |
| 52 | p.Met52Gly | 0.98  | -0.03 | Neutral       | 0.98  | -0.03 | Neutral       |
| 52 | p.Met52Val | 0.98  | -0.03 | Neutral       | 0.98  | -0.03 | Neutral       |
| 52 | p.Met52Tyr | 1.50  | 0.59  | Indeterminate | 1.50  | 0.59  | Indeterminate |
| 52 | p.Met52Cys | 0.96  | -0.06 | Neutral       | 0.96  | -0.06 | Neutral       |
| 52 | p.Met52Trp | 1.98  | 0.99  | Indeterminate | 1.98  | 0.99  | Indeterminate |
| 52 | p.Met52Phe | 1.29  | 0.37  | Indeterminate | 1.29  | 0.37  | Indeterminate |
| 53 | p.Met53Asn | 2.85  | 1.51  | Deleterious   | 2.85  | 1.51  | Deleterious   |
| 53 | p.Met53Lys | 1.89  | 0.92  | Indeterminate | 1.89  | 0.92  | Indeterminate |
| 53 | p.Met53Thr | 3.31  | 1.73  | Deleterious   | 3.31  | 1.73  | Deleterious   |
| 53 | p.Met53Arg | 1.43  | 0.51  | Indeterminate | 1.43  | 0.51  | Indeterminate |
| 53 | p.Met53Ser | 1.68  | 0.75  | Indeterminate | 1.68  | 0.75  | Indeterminate |
| 53 | p.Met53Ile | 6.83  | 2.77  | Deleterious   | 6.83  | 2.77  | Deleterious   |
| 53 | p.Met53Met | 1.00  | 0.00  | Neutral       | 1.00  | 0.00  | Neutral       |
| 53 | p.Met53His | 3.28  | 1.71  | Deleterious   | 3.28  | 1.71  | Deleterious   |
| 53 | p.Met53Gln | 1.45  | 0.53  | Indeterminate | 1.45  | 0.53  | Indeterminate |
| 53 | p.Met53Pro | 9.71  | 3.28  | Deleterious   | 9.71  | 3.28  | Deleterious   |
| 53 | p.Met53Leu | 1.81  | 0.86  | Indeterminate | 1.81  | 0.86  | Indeterminate |
| 53 | p.Met53Asp | 13.93 | 3.80  | Deleterious   | 13.93 | 3.80  | Deleterious   |
| 53 | p.Met53Glu | 4.03  | 2.01  | Deleterious   | 4.03  | 2.01  | Deleterious   |
| 53 | p.Met53Ala | 1.58  | 0.66  | Indeterminate | 1.58  | 0.66  | Indeterminate |
| 53 | p.Met53Gly | 6.11  | 2.61  | Deleterious   | 6.11  | 2.61  | Deleterious   |

|    |            |       |       |               |      |       |               |       |               |               |
|----|------------|-------|-------|---------------|------|-------|---------------|-------|---------------|---------------|
| 53 | p.Met53Val | 7.64  | 2.93  | Deleterious   |      |       | 7.64          | 2.93  | Deleterious   |               |
| 53 | p.Met53Tyr | 6.71  | 2.75  | Deleterious   |      |       | 6.71          | 2.75  | Deleterious   |               |
| 53 | p.Met53Cys | 1.82  | 0.86  | Indeterminate |      |       | 1.82          | 0.86  | Indeterminate |               |
| 53 | p.Met53Trp | 11.34 | 3.50  | Deleterious   |      |       | 11.34         | 3.50  | Deleterious   |               |
| 53 | p.Met53Phe | 5.92  | 2.57  | Deleterious   |      |       | 5.92          | 2.57  | Deleterious   |               |
| 54 | p.Met54Asn | 1.34  | 0.43  | Indeterminate |      |       | 1.34          | 0.43  | Indeterminate |               |
| 54 | p.Met54Lys | 1.87  | 0.91  | Indeterminate |      |       | 1.87          | 0.91  | Indeterminate |               |
| 54 | p.Met54Thr | 0.96  | -0.05 | Neutral       |      |       | 0.96          | -0.05 | Neutral       |               |
| 54 | p.Met54Arg | 2.35  | 1.23  | Deleterious   |      |       | 2.35          | 1.23  | Deleterious   |               |
| 54 | p.Met54Ser | 1.12  | 0.17  | Neutral       |      |       | 1.12          | 0.17  | Neutral       |               |
| 54 | p.Met54Ile | 1.18  | 0.24  | Indeterminate |      |       | 1.18          | 0.24  | Indeterminate |               |
| 54 | p.Met54Met | 1.00  | 0.00  | Neutral       |      |       | 1.00          | 0.00  | Neutral       |               |
| 54 | p.Met54His | 1.26  | 0.33  | Indeterminate |      |       | 1.26          | 0.33  | Indeterminate |               |
| 54 | p.Met54Gln | 1.66  | 0.74  | Indeterminate |      |       | 1.66          | 0.74  | Indeterminate |               |
| 54 | p.Met54Pro | 2.75  | 1.46  | Deleterious   |      |       | 2.75          | 1.46  | Deleterious   |               |
| 54 | p.Met54Leu | 1.09  | 0.13  | Neutral       |      |       | 1.09          | 0.13  | Neutral       |               |
| 54 | p.Met54Asp | 2.35  | 1.23  | Deleterious   |      |       | 2.35          | 1.23  | Deleterious   |               |
| 54 | p.Met54Glu | 2.09  | 1.07  | Indeterminate |      |       | 2.09          | 1.07  | Indeterminate |               |
| 54 | p.Met54Ala | 1.01  | 0.02  | Neutral       |      |       | 1.01          | 0.02  | Neutral       |               |
| 54 | p.Met54Gly | 1.03  | 0.05  | Neutral       |      |       | 1.03          | 0.05  | Neutral       |               |
| 54 | p.Met54Val | 1.05  | 0.07  | Neutral       |      |       | 1.05          | 0.07  | Neutral       |               |
| 54 | p.Met54Tyr | 1.04  | 0.06  | Neutral       |      |       | 1.04          | 0.06  | Neutral       |               |
| 54 | p.Met54Cys | 0.90  | -0.15 | Neutral       |      |       | 0.90          | -0.15 | Neutral       |               |
| 54 | p.Met54Trp | 1.22  | 0.29  | Indeterminate |      |       | 1.22          | 0.29  | Indeterminate |               |
| 54 | p.Met54Phe | 1.11  | 0.15  | Neutral       |      |       | 1.11          | 0.15  | Neutral       |               |
| 55 | p.Gly55Asn | 12.63 | 3.66  | Deleterious   |      |       | 12.63         | 3.66  | Deleterious   |               |
| 55 | p.Gly55Lys | 12.04 | 3.59  | Deleterious   |      |       | 12.04         | 3.59  | Deleterious   |               |
| 55 | p.Gly55Thr | 9.96  | 3.32  | Deleterious   |      |       | 9.96          | 3.32  | Deleterious   |               |
| 55 | p.Gly55Arg | 11.97 | 3.58  | Deleterious   |      |       | 11.97         | 3.58  | Deleterious   |               |
| 55 | p.Gly55Ser | 2.68  | 1.42  | Deleterious   |      |       | 2.68          | 1.42  | Deleterious   |               |
| 55 | p.Gly55Ile | 11.78 | 3.56  | Deleterious   |      |       | 11.78         | 3.56  | Deleterious   |               |
| 55 | p.Gly55Met | 14.07 | 3.81  | Deleterious   |      |       | 14.07         | 3.81  | Deleterious   |               |
| 55 | p.Gly55His | 15.68 | 3.97  | Deleterious   |      |       | 15.68         | 3.97  | Deleterious   |               |
| 55 | p.Gly55Gln | 13.16 | 3.72  | Deleterious   |      |       | 13.16         | 3.72  | Deleterious   |               |
| 55 | p.Gly55Pro | 20.49 | 4.36  | Deleterious   |      |       | 20.49         | 4.36  | Deleterious   |               |
| 55 | p.Gly55Leu | 17.12 | 4.10  | Deleterious   |      |       | 17.12         | 4.10  | Deleterious   |               |
| 55 | p.Gly55Asp | 16.49 | 4.04  | Deleterious   |      |       | 16.49         | 4.04  | Deleterious   |               |
| 55 | p.Gly55Glu | 13.07 | 3.71  | Deleterious   |      |       | 13.07         | 3.71  | Deleterious   |               |
| 55 | p.Gly55Ala | 1.62  | 0.70  | Indeterminate |      |       | 1.62          | 0.70  | Indeterminate |               |
| 55 | p.Gly55Gly | 1.00  | 0.00  | Neutral       |      |       | 1.00          | 0.00  | Neutral       |               |
| 55 | p.Gly55Val | 14.09 | 3.82  | Deleterious   |      |       | 14.09         | 3.82  | Deleterious   |               |
| 55 | p.Gly55Tyr | 10.85 | 3.44  | Deleterious   |      |       | 10.85         | 3.44  | Deleterious   |               |
| 55 | p.Gly55Cys | 3.75  | 1.91  | Deleterious   |      |       | 3.75          | 1.91  | Deleterious   |               |
| 55 | p.Gly55Trp | 14.81 | 3.89  | Deleterious   |      |       | 14.81         | 3.89  | Deleterious   |               |
| 55 | p.Gly55Phe | 11.47 | 3.52  | Deleterious   |      |       | 11.47         | 3.52  | Deleterious   |               |
| 56 | p.Ser56Asn | 0.30  | -1.72 | Neutral       |      |       | 0.30          | -1.72 | Neutral       |               |
| 56 | p.Ser56Lys | 0.82  | -0.29 | Neutral       |      |       | 0.82          | -0.29 | Neutral       |               |
| 56 | p.Ser56Thr | 0.79  | -0.34 | Neutral       |      |       | 0.79          | -0.34 | Neutral       |               |
| 56 | p.Ser56Arg | 0.38  | -1.41 | Neutral       |      |       | 0.38          | -1.41 | Neutral       |               |
| 56 | p.Ser56Ser | 1.00  | 0.00  | Neutral       |      |       | 1.00          | 0.00  | Neutral       |               |
| 56 | p.Ser56Ile | 6.45  | 2.69  | Deleterious   |      |       | 6.45          | 2.69  | Deleterious   |               |
| 56 | p.Ser56Met | 0.42  | -1.27 | Neutral       |      |       | 0.42          | -1.27 | Neutral       |               |
| 56 | p.Ser56His | 0.43  | -1.23 | Neutral       |      |       | 0.43          | -1.23 | Neutral       |               |
| 56 | p.Ser56Gln | 0.57  | -0.81 | Neutral       |      |       | 0.57          | -0.81 | Neutral       |               |
| 56 | p.Ser56Pro | 12.14 | 3.60  | Deleterious   |      |       | 12.14         | 3.60  | Deleterious   |               |
| 56 | p.Ser56Leu | 1.87  | 0.90  | Indeterminate |      |       | 1.87          | 0.90  | Indeterminate |               |
| 56 | p.Ser56Asp | 0.79  | -0.34 | Neutral       |      |       | 0.79          | -0.34 | Neutral       |               |
| 56 | p.Ser56Glu | 1.20  | 0.26  | Indeterminate |      |       | 1.20          | 0.26  | Indeterminate |               |
| 56 | p.Ser56Ala | 0.77  | -0.38 | Neutral       |      |       | 0.77          | -0.38 | Neutral       |               |
| 56 | p.Ser56Gly | 1.18  | 0.24  | Neutral       |      |       | 1.18          | 0.24  | Neutral       |               |
| 56 | p.Ser56Val | 1.16  | 0.22  | Neutral       |      |       | 1.16          | 0.22  | Neutral       |               |
| 56 | p.Ser56Tyr | 0.50  | -0.99 | Neutral       |      |       | 0.50          | -0.99 | Neutral       |               |
| 56 | p.Ser56Cys | 0.43  | -1.22 | Neutral       |      |       | 0.43          | -1.22 | Neutral       |               |
| 56 | p.Ser56Trp | 4.65  | 2.22  | Deleterious   |      |       | 4.65          | 2.22  | Deleterious   |               |
| 56 | p.Ser56Phe | 0.72  | -0.47 | Neutral       |      |       | 0.72          | -0.47 | Neutral       |               |
| 57 | p.Ala57Asn | 0.47  | -1.08 | Neutral       | 1.14 | 0.19  | Neutral       | 0.81  | -0.31         | Neutral       |
| 57 | p.Ala57Lys | 0.43  | -1.22 | Neutral       | 1.30 | 0.38  | Indeterminate | 0.87  | -0.21         | Neutral       |
| 57 | p.Ala57Thr | 0.56  | -0.83 | Neutral       | 1.31 | 0.39  | Indeterminate | 0.94  | -0.09         | Neutral       |
| 57 | p.Ala57Arg | 0.49  | -1.03 | Neutral       | 1.04 | 0.05  | Neutral       | 0.76  | -0.39         | Neutral       |
| 57 | p.Ala57Ser | 0.58  | -0.79 | Neutral       | 1.58 | 0.66  | Indeterminate | 1.08  | 0.11          | Neutral       |
| 57 | p.Ala57Ile | 0.71  | -0.49 | Neutral       | 1.17 | 0.23  | Neutral       | 0.94  | -0.09         | Neutral       |
| 57 | p.Ala57Met | 0.45  | -1.16 | Neutral       | 1.26 | 0.33  | Indeterminate | 0.85  | -0.23         | Neutral       |
| 57 | p.Ala57His | 0.56  | -0.84 | Neutral       | 0.90 | -0.15 | Neutral       | 0.73  | -0.45         | Neutral       |
| 57 | p.Ala57Gln | 0.54  | -0.89 | Neutral       | 1.27 | 0.34  | Indeterminate | 0.90  | -0.14         | Neutral       |
| 57 | p.Ala57Pro | 0.62  | -0.70 | Neutral       | 1.49 | 0.58  | Indeterminate | 1.05  | 0.08          | Neutral       |
| 57 | p.Ala57Leu | 0.44  | -1.17 | Neutral       | 1.62 | 0.70  | Indeterminate | 1.03  | 0.05          | Neutral       |
| 57 | p.Ala57Asp | 0.77  | -0.38 | Neutral       | 1.05 | 0.07  | Neutral       | 0.91  | -0.14         | Neutral       |
| 57 | p.Ala57Glu | 0.56  | -0.83 | Neutral       | 1.84 | 0.88  | Indeterminate | 1.20  | 0.27          | Indeterminate |
| 57 | p.Ala57Ala | 1.00  | 0.00  | Neutral       | 1.00 | 0.00  | Neutral       | 1.00  | 0.00          | Neutral       |
| 57 | p.Ala57Gly | 0.50  | -1.00 | Neutral       | 1.27 | 0.35  | Indeterminate | 0.89  | -0.18         | Neutral       |
| 57 | p.Ala57Val | 0.53  | -0.91 | Neutral       | 1.10 | 0.14  | Neutral       | 0.82  | -0.29         | Neutral       |
| 57 | p.Ala57Tyr | 0.52  | -0.93 | Neutral       | 1.86 | 0.89  | Indeterminate | 1.19  | 0.25          | Indeterminate |
| 57 | p.Ala57Cys | 0.38  | -1.40 | Neutral       | 1.53 | 0.61  | Indeterminate | 0.95  | -0.07         | Neutral       |
| 57 | p.Ala57Trp | 0.46  | -1.13 | Neutral       | 1.54 | 0.63  | Indeterminate | 1.00  | 0.00          | Neutral       |
| 57 | p.Ala57Phe | 0.33  | -1.62 | Neutral       | 1.69 | 0.76  | Indeterminate | 1.01  | 0.01          | Neutral       |
| 58 | p.Arg58Asn | 0.75  | -0.41 | Neutral       |      |       | 0.75          | -0.41 | Neutral       |               |
| 58 | p.Arg58Lys | 0.71  | -0.49 | Neutral       |      |       | 0.71          | -0.49 | Neutral       |               |
| 58 | p.Arg58Thr | 0.81  | -0.31 | Neutral       |      |       | 0.81          | -0.31 | Neutral       |               |
| 58 | p.Arg58Arg | 1.00  | 0.00  | Neutral       |      |       | 1.00          | 0.00  | Neutral       |               |
| 58 | p.Arg58Ser | 0.76  | -0.40 | Neutral       |      |       | 0.76          | -0.40 | Neutral       |               |
| 58 | p.Arg58Ile | 0.81  | -0.31 | Neutral       |      |       | 0.81          | -0.31 | Neutral       |               |
| 58 | p.Arg58Met | 0.71  | -0.50 | Neutral       |      |       | 0.71          | -0.50 | Neutral       |               |
| 58 | p.Arg58His | 0.64  | -0.65 | Neutral       |      |       | 0.64          | -0.65 | Neutral       |               |
| 58 | p.Arg58Gln | 0.93  | -0.10 | Neutral       |      |       | 0.93          | -0.10 | Neutral       |               |
| 58 | p.Arg58Pro | 1.08  | 0.11  | Neutral       |      |       | 1.08          | 0.11  | Neutral       |               |
| 58 | p.Arg58Leu | 0.83  | -0.28 | Neutral       |      |       | 0.83          | -0.28 | Neutral       |               |
| 58 | p.Arg58Asp | 0.72  | -0.48 | Neutral       |      |       | 0.72          | -0.48 | Neutral       |               |
| 58 | p.Arg58Glu | 0.83  | -0.26 | Neutral       |      |       | 0.83          | -0.26 | Neutral       |               |
| 58 | p.Arg58Ala | 0.88  | -0.18 | Neutral       |      |       | 0.88          | -0.18 | Neutral       |               |
| 58 | p.Arg58Gly | 0.93  | -0.11 | Neutral       |      |       | 0.93          | -0.11 | Neutral       |               |
| 58 | p.Arg58Val | 0.90  | -0.16 | Neutral       |      |       | 0.90          | -0.16 | Neutral       |               |
| 58 | p.Arg58Tyr | 0.62  | -0.69 | Neutral       |      |       | 0.62          | -0.69 | Neutral       |               |
| 58 | p.Arg58Cys | 0.71  | -0.50 | Neutral       |      |       | 0.71          | -0.50 | Neutral       |               |
| 58 | p.Arg58Trp | 0.76  | -0.40 | Neutral       |      |       | 0.76          | -0.40 | Neutral       |               |
| 58 | p.Arg58Phe | 0.90  | -0.16 | Neutral       |      |       | 0.90          | -0.16 | Neutral       |               |
| 59 | p.Val59Asn | 3.19  | 1.67  | Deleterious   |      |       | 3.19          | 1.67  | Deleterious   |               |



|    |            |       |       |               |       |       |               |
|----|------------|-------|-------|---------------|-------|-------|---------------|
| 64 | p.Leu64His | 1.25  | 0.32  | Indeterminate | 1.25  | 0.32  | Indeterminate |
| 64 | p.Leu64Gln | 1.34  | 0.43  | Indeterminate | 1.34  | 0.43  | Indeterminate |
| 64 | p.Leu64Pro | 3.96  | 1.99  | Deleterious   | 3.96  | 1.99  | Deleterious   |
| 64 | p.Leu64Leu | 1.00  | 0.00  | Neutral       | 1.00  | 0.00  | Neutral       |
| 64 | p.Leu64Asp | 1.80  | 0.85  | Indeterminate | 1.80  | 0.85  | Indeterminate |
| 64 | p.Leu64Glu | 1.41  | 0.50  | Indeterminate | 1.41  | 0.50  | Indeterminate |
| 64 | p.Leu64Ala | 1.14  | 0.19  | Neutral       | 1.14  | 0.19  | Neutral       |
| 64 | p.Leu64Gly | 1.37  | 0.46  | Indeterminate | 1.37  | 0.46  | Indeterminate |
| 64 | p.Leu64Val | 0.81  | -0.30 | Neutral       | 0.81  | -0.30 | Neutral       |
| 64 | p.Leu64Tyr | 1.01  | 0.02  | Neutral       | 1.01  | 0.02  | Neutral       |
| 64 | p.Leu64Cys | 0.97  | -0.05 | Neutral       | 0.97  | -0.05 | Neutral       |
| 64 | p.Leu64Trp | 1.09  | 0.12  | Neutral       | 1.09  | 0.12  | Neutral       |
| 64 | p.Leu64Phe | 0.83  | -0.27 | Neutral       | 0.83  | -0.27 | Neutral       |
| 65 | p.Leu65Asn | 1.41  | 0.50  | Indeterminate | 1.41  | 0.50  | Indeterminate |
| 65 | p.Leu65Lys | 0.82  | -0.28 | Neutral       | 0.82  | -0.28 | Neutral       |
| 65 | p.Leu65Thr | 1.18  | 0.23  | Neutral       | 1.18  | 0.23  | Neutral       |
| 65 | p.Leu65Arg | 0.95  | -0.07 | Neutral       | 0.95  | -0.07 | Neutral       |
| 65 | p.Leu65Ser | 1.22  | 0.29  | Indeterminate | 1.22  | 0.29  | Indeterminate |
| 65 | p.Leu65Ile | 0.97  | -0.04 | Neutral       | 0.97  | -0.04 | Neutral       |
| 65 | p.Leu65Met | 0.81  | -0.30 | Neutral       | 0.81  | -0.30 | Neutral       |
| 65 | p.Leu65His | 1.30  | 0.38  | Indeterminate | 1.30  | 0.38  | Indeterminate |
| 65 | p.Leu65Gln | 1.26  | 0.33  | Indeterminate | 1.26  | 0.33  | Indeterminate |
| 65 | p.Leu65Pro | 11.28 | 3.50  | Deleterious   | 11.28 | 3.50  | Deleterious   |
| 65 | p.Leu65Leu | 1.00  | 0.00  | Neutral       | 1.00  | 0.00  | Neutral       |
| 65 | p.Leu65Asp | 0.96  | -0.06 | Neutral       | 0.96  | -0.06 | Neutral       |
| 65 | p.Leu65Glu | 0.90  | -0.14 | Neutral       | 0.90  | -0.14 | Neutral       |
| 65 | p.Leu65Ala | 1.18  | 0.23  | Neutral       | 1.18  | 0.23  | Neutral       |
| 65 | p.Leu65Gly | 1.49  | 0.57  | Indeterminate | 1.49  | 0.57  | Indeterminate |
| 65 | p.Leu65Val | 1.11  | 0.15  | Neutral       | 1.11  | 0.15  | Neutral       |
| 65 | p.Leu65Tyr | 0.99  | -0.01 | Neutral       | 0.99  | -0.01 | Neutral       |
| 65 | p.Leu65Cys | 1.57  | 0.65  | Indeterminate | 1.57  | 0.65  | Indeterminate |
| 65 | p.Leu65Trp | 1.40  | 0.49  | Indeterminate | 1.40  | 0.49  | Indeterminate |
| 65 | p.Leu65Phe | 0.97  | -0.05 | Neutral       | 0.97  | -0.05 | Neutral       |
| 66 | p.His66Asn | 0.87  | -0.21 | Neutral       | 0.87  | -0.21 | Neutral       |
| 66 | p.His66Lys | 0.89  | -0.16 | Neutral       | 0.89  | -0.16 | Neutral       |
| 66 | p.His66Thr | 1.15  | 0.20  | Neutral       | 1.15  | 0.20  | Neutral       |
| 66 | p.His66Arg | 1.21  | 0.28  | Indeterminate | 1.21  | 0.28  | Indeterminate |
| 66 | p.His66Ser | 1.03  | 0.05  | Neutral       | 1.03  | 0.05  | Neutral       |
| 66 | p.His66Ile | 1.57  | 0.65  | Indeterminate | 1.57  | 0.65  | Indeterminate |
| 66 | p.His66Met | 0.91  | -0.14 | Neutral       | 0.91  | -0.14 | Neutral       |
| 66 | p.His66His | 1.00  | 0.00  | Neutral       | 1.00  | 0.00  | Neutral       |
| 66 | p.His66Gln | 1.14  | 0.19  | Neutral       | 1.14  | 0.19  | Neutral       |
| 66 | p.His66Pro | 18.02 | 4.17  | Deleterious   | 18.02 | 4.17  | Deleterious   |
| 66 | p.His66Leu | 1.18  | 0.24  | Indeterminate | 1.18  | 0.24  | Indeterminate |
| 66 | p.His66Asp | 0.96  | -0.06 | Neutral       | 0.96  | -0.06 | Neutral       |
| 66 | p.His66Glu | 1.34  | 0.42  | Indeterminate | 1.34  | 0.42  | Indeterminate |
| 66 | p.His66Ala | 1.24  | 0.31  | Indeterminate | 1.24  | 0.31  | Indeterminate |
| 66 | p.His66Gly | 1.08  | 0.12  | Neutral       | 1.08  | 0.12  | Neutral       |
| 66 | p.His66Val | 1.40  | 0.49  | Indeterminate | 1.40  | 0.49  | Indeterminate |
| 66 | p.His66Tyr | 1.05  | 0.08  | Neutral       | 1.05  | 0.08  | Neutral       |
| 66 | p.His66Cys | 0.69  | -0.53 | Neutral       | 0.69  | -0.53 | Neutral       |
| 66 | p.His66Trp | 0.97  | -0.04 | Neutral       | 0.97  | -0.04 | Neutral       |
| 66 | p.His66Phe | 1.00  | 0.00  | Neutral       | 1.00  | 0.00  | Neutral       |
| 67 | p.Gly67Asn | 0.80  | -0.33 | Neutral       | 0.80  | -0.33 | Neutral       |
| 67 | p.Gly67Lys | 1.04  | 0.05  | Neutral       | 1.04  | 0.05  | Neutral       |
| 67 | p.Gly67Thr | 1.66  | 0.73  | Indeterminate | 1.66  | 0.73  | Indeterminate |
| 67 | p.Gly67Arg | 0.67  | -0.57 | Neutral       | 0.67  | -0.57 | Neutral       |
| 67 | p.Gly67Ser | 0.75  | -0.42 | Neutral       | 0.75  | -0.42 | Neutral       |
| 67 | p.Gly67Ile | 7.82  | 2.97  | Deleterious   | 7.82  | 2.97  | Deleterious   |
| 67 | p.Gly67Met | 1.18  | 0.24  | Neutral       | 1.18  | 0.24  | Neutral       |
| 67 | p.Gly67His | 0.76  | -0.40 | Neutral       | 0.76  | -0.40 | Neutral       |
| 67 | p.Gly67Gln | 0.61  | -0.71 | Neutral       | 0.61  | -0.71 | Neutral       |
| 67 | p.Gly67Pro | 15.51 | 3.95  | Deleterious   | 15.51 | 3.95  | Deleterious   |
| 67 | p.Gly67Leu | 0.96  | -0.05 | Neutral       | 0.96  | -0.05 | Neutral       |
| 67 | p.Gly67Asp | 0.82  | -0.28 | Neutral       | 0.82  | -0.28 | Neutral       |
| 67 | p.Gly67Glu | 0.81  | -0.30 | Neutral       | 0.81  | -0.30 | Neutral       |
| 67 | p.Gly67Ala | 0.64  | -0.63 | Neutral       | 0.64  | -0.63 | Neutral       |
| 67 | p.Gly67Gly | 1.00  | 0.00  | Neutral       | 1.00  | 0.00  | Neutral       |
| 67 | p.Gly67Val | 4.79  | 2.26  | Deleterious   | 4.79  | 2.26  | Deleterious   |
| 67 | p.Gly67Tyr | 0.91  | -0.14 | Neutral       | 0.91  | -0.14 | Neutral       |
| 67 | p.Gly67Cys | 1.14  | 0.19  | Neutral       | 1.14  | 0.19  | Neutral       |
| 67 | p.Gly67Trp | 1.46  | 0.54  | Indeterminate | 1.46  | 0.54  | Indeterminate |
| 67 | p.Gly67Phe | 1.17  | 0.23  | Neutral       | 1.17  | 0.23  | Neutral       |
| 68 | p.Ala68Asn | 3.18  | 1.67  | Deleterious   | 3.18  | 1.67  | Deleterious   |
| 68 | p.Ala68Lys | 4.02  | 2.01  | Deleterious   | 4.02  | 2.01  | Deleterious   |
| 68 | p.Ala68Thr | 1.35  | 0.43  | Indeterminate | 1.35  | 0.43  | Indeterminate |
| 68 | p.Ala68Arg | 4.05  | 2.02  | Deleterious   | 4.05  | 2.02  | Deleterious   |
| 68 | p.Ala68Ser | 0.96  | -0.05 | Neutral       | 0.96  | -0.05 | Neutral       |
| 68 | p.Ala68Ile | 3.27  | 1.71  | Deleterious   | 3.27  | 1.71  | Deleterious   |
| 68 | p.Ala68Met | 2.86  | 1.51  | Deleterious   | 2.86  | 1.51  | Deleterious   |
| 68 | p.Ala68His | 2.14  | 1.10  | Deleterious   | 2.14  | 1.10  | Deleterious   |
| 68 | p.Ala68Gln | 3.25  | 1.70  | Deleterious   | 3.25  | 1.70  | Deleterious   |
| 68 | p.Ala68Pro | 3.53  | 1.82  | Deleterious   | 3.53  | 1.82  | Deleterious   |
| 68 | p.Ala68Leu | 3.66  | 1.87  | Deleterious   | 3.66  | 1.87  | Deleterious   |
| 68 | p.Ala68Asp | 2.46  | 1.30  | Deleterious   | 2.46  | 1.30  | Deleterious   |
| 68 | p.Ala68Glu | 2.62  | 1.39  | Deleterious   | 2.62  | 1.39  | Deleterious   |
| 68 | p.Ala68Ala | 1.00  | 0.00  | Neutral       | 1.00  | 0.00  | Neutral       |
| 68 | p.Ala68Gly | 1.07  | 0.10  | Neutral       | 1.07  | 0.10  | Neutral       |
| 68 | p.Ala68Val | 1.78  | 0.83  | Indeterminate | 1.78  | 0.83  | Indeterminate |
| 68 | p.Ala68Tyr | 3.77  | 1.91  | Deleterious   | 3.77  | 1.91  | Deleterious   |
| 68 | p.Ala68Cys | 1.13  | 0.17  | Neutral       | 1.13  | 0.17  | Neutral       |
| 68 | p.Ala68Trp | 4.01  | 2.01  | Deleterious   | 4.01  | 2.01  | Deleterious   |
| 68 | p.Ala68Phe | 3.65  | 1.87  | Deleterious   | 3.65  | 1.87  | Deleterious   |
| 69 | p.Glu69Asn | 2.72  | 1.44  | Deleterious   | 2.72  | 1.44  | Deleterious   |
| 69 | p.Glu69Lys | 2.34  | 1.23  | Deleterious   | 2.34  | 1.23  | Deleterious   |
| 69 | p.Glu69Thr | 1.54  | 0.62  | Indeterminate | 1.54  | 0.62  | Indeterminate |
| 69 | p.Glu69Arg | 1.08  | 0.10  | Neutral       | 1.08  | 0.10  | Neutral       |
| 69 | p.Glu69Ser | 1.80  | 0.85  | Indeterminate | 1.80  | 0.85  | Indeterminate |
| 69 | p.Glu69Ile | 1.34  | 0.43  | Indeterminate | 1.34  | 0.43  | Indeterminate |
| 69 | p.Glu69Met | 2.32  | 1.21  | Deleterious   | 2.32  | 1.21  | Deleterious   |
| 69 | p.Glu69His | 1.43  | 0.52  | Indeterminate | 1.43  | 0.52  | Indeterminate |
| 69 | p.Glu69Gln | 1.35  | 0.43  | Indeterminate | 1.35  | 0.43  | Indeterminate |
| 69 | p.Glu69Pro | 4.86  | 2.28  | Deleterious   | 4.86  | 2.28  | Deleterious   |
| 69 | p.Glu69Leu | 2.65  | 1.40  | Deleterious   | 2.65  | 1.40  | Deleterious   |
| 69 | p.Glu69Asp | 1.27  | 0.35  | Indeterminate | 1.27  | 0.35  | Indeterminate |
| 69 | p.Glu69Glu | 1.00  | 0.00  | Neutral       | 1.00  | 0.00  | Neutral       |





|    |            |       |       |               |       |       |               |
|----|------------|-------|-------|---------------|-------|-------|---------------|
| 80 | p.Arg80Ile | 2.45  | 1.29  | Deleterious   | 2.45  | 1.29  | Deleterious   |
| 80 | p.Arg80Met | 1.45  | 0.54  | Indeterminate | 1.45  | 0.54  | Indeterminate |
| 80 | p.Arg80His | 1.31  | 0.39  | Indeterminate | 1.31  | 0.39  | Indeterminate |
| 80 | p.Arg80Gln | 1.54  | 0.62  | Indeterminate | 1.54  | 0.62  | Indeterminate |
| 80 | p.Arg80Pro | 4.66  | 2.22  | Deleterious   | 4.66  | 2.22  | Deleterious   |
| 80 | p.Arg80Leu | 1.47  | 0.56  | Indeterminate | 1.47  | 0.56  | Indeterminate |
| 80 | p.Arg80Asp | 1.61  | 0.69  | Indeterminate | 1.61  | 0.69  | Indeterminate |
| 80 | p.Arg80Glu | 1.16  | 0.21  | Neutral       | 1.16  | 0.21  | Neutral       |
| 80 | p.Arg80Ala | 1.32  | 0.40  | Indeterminate | 1.32  | 0.40  | Indeterminate |
| 80 | p.Arg80Gly | 1.34  | 0.42  | Indeterminate | 1.34  | 0.42  | Indeterminate |
| 80 | p.Arg80Val | 1.64  | 0.71  | Indeterminate | 1.64  | 0.71  | Indeterminate |
| 80 | p.Arg80Tyr | 1.46  | 0.55  | Indeterminate | 1.46  | 0.55  | Indeterminate |
| 80 | p.Arg80Cys | 0.88  | -0.18 | Neutral       | 0.88  | -0.18 | Neutral       |
| 80 | p.Arg80Trp | 1.47  | 0.55  | Indeterminate | 1.47  | 0.55  | Indeterminate |
| 80 | p.Arg80Phe | 1.55  | 0.63  | Indeterminate | 1.55  | 0.63  | Indeterminate |
| 81 | p.Pro81Asn | 4.72  | 2.24  | Deleterious   | 4.72  | 2.24  | Deleterious   |
| 81 | p.Pro81Lys | 6.35  | 2.67  | Deleterious   | 6.35  | 2.67  | Deleterious   |
| 81 | p.Pro81Thr | 2.72  | 1.44  | Deleterious   | 2.72  | 1.44  | Deleterious   |
| 81 | p.Pro81Arg | 4.70  | 2.23  | Deleterious   | 4.70  | 2.23  | Deleterious   |
| 81 | p.Pro81Ser | 3.30  | 1.72  | Deleterious   | 3.30  | 1.72  | Deleterious   |
| 81 | p.Pro81Ile | 3.52  | 1.81  | Deleterious   | 3.52  | 1.81  | Deleterious   |
| 81 | p.Pro81Met | 4.37  | 2.13  | Deleterious   | 4.37  | 2.13  | Deleterious   |
| 81 | p.Pro81His | 5.15  | 2.36  | Deleterious   | 5.15  | 2.36  | Deleterious   |
| 81 | p.Pro81Gln | 7.78  | 2.96  | Deleterious   | 7.78  | 2.96  | Deleterious   |
| 81 | p.Pro81Pro | 1.00  | 0.00  | Neutral       | 1.00  | 0.00  | Neutral       |
| 81 | p.Pro81Leu | 3.71  | 1.89  | Deleterious   | 3.71  | 1.89  | Deleterious   |
| 81 | p.Pro81Asp | 5.03  | 2.33  | Deleterious   | 5.03  | 2.33  | Deleterious   |
| 81 | p.Pro81Glu | 6.20  | 2.63  | Deleterious   | 6.20  | 2.63  | Deleterious   |
| 81 | p.Pro81Ala | 1.67  | 0.74  | Indeterminate | 1.67  | 0.74  | Indeterminate |
| 81 | p.Pro81Gly | 3.90  | 1.96  | Deleterious   | 3.90  | 1.96  | Deleterious   |
| 81 | p.Pro81Val | 2.62  | 1.39  | Deleterious   | 2.62  | 1.39  | Deleterious   |
| 81 | p.Pro81Tyr | 4.30  | 2.10  | Deleterious   | 4.30  | 2.10  | Deleterious   |
| 81 | p.Pro81Cys | 2.08  | 1.06  | Indeterminate | 2.08  | 1.06  | Indeterminate |
| 81 | p.Pro81Trp | 5.08  | 2.35  | Deleterious   | 5.08  | 2.35  | Deleterious   |
| 81 | p.Pro81Phe | 4.51  | 2.17  | Deleterious   | 4.51  | 2.17  | Deleterious   |
| 82 | p.Val82Asn | 2.35  | 1.23  | Deleterious   | 2.35  | 1.23  | Deleterious   |
| 82 | p.Val82Lys | 3.03  | 1.60  | Deleterious   | 3.03  | 1.60  | Deleterious   |
| 82 | p.Val82Thr | 1.50  | 0.58  | Indeterminate | 1.50  | 0.58  | Indeterminate |
| 82 | p.Val82Arg | 3.09  | 1.63  | Deleterious   | 3.09  | 1.63  | Deleterious   |
| 82 | p.Val82Ser | 1.36  | 0.44  | Indeterminate | 1.36  | 0.44  | Indeterminate |
| 82 | p.Val82Ile | 1.28  | 0.36  | Indeterminate | 1.28  | 0.36  | Indeterminate |
| 82 | p.Val82Met | 0.83  | -0.27 | Neutral       | 0.83  | -0.27 | Neutral       |
| 82 | p.Val82His | 2.45  | 1.29  | Deleterious   | 2.45  | 1.29  | Deleterious   |
| 82 | p.Val82Gln | 1.41  | 0.50  | Indeterminate | 1.41  | 0.50  | Indeterminate |
| 82 | p.Val82Pro | 2.04  | 1.03  | Indeterminate | 2.04  | 1.03  | Indeterminate |
| 82 | p.Val82Leu | 1.14  | 0.19  | Neutral       | 1.14  | 0.19  | Neutral       |
| 82 | p.Val82Asp | 2.78  | 1.48  | Deleterious   | 2.78  | 1.48  | Deleterious   |
| 82 | p.Val82Glu | 2.14  | 1.10  | Deleterious   | 2.14  | 1.10  | Deleterious   |
| 82 | p.Val82Ala | 1.01  | 0.01  | Neutral       | 1.01  | 0.01  | Neutral       |
| 82 | p.Val82Gly | 2.04  | 1.03  | Indeterminate | 2.04  | 1.03  | Indeterminate |
| 82 | p.Val82Val | 1.00  | 0.00  | Neutral       | 1.00  | 0.00  | Neutral       |
| 82 | p.Val82Tyr | 2.89  | 1.53  | Deleterious   | 2.89  | 1.53  | Deleterious   |
| 82 | p.Val82Cys | 1.33  | 0.41  | Indeterminate | 1.33  | 0.41  | Indeterminate |
| 82 | p.Val82Trp | 3.55  | 1.83  | Deleterious   | 3.55  | 1.83  | Deleterious   |
| 82 | p.Val82Phe | 1.80  | 0.84  | Indeterminate | 1.80  | 0.84  | Indeterminate |
| 83 | p.His83Asn | 7.57  | 2.92  | Deleterious   | 7.57  | 2.92  | Deleterious   |
| 83 | p.His83Lys | 10.58 | 3.40  | Deleterious   | 10.58 | 3.40  | Deleterious   |
| 83 | p.His83Thr | 6.28  | 2.65  | Deleterious   | 6.28  | 2.65  | Deleterious   |
| 83 | p.His83Arg | 11.18 | 3.48  | Deleterious   | 11.18 | 3.48  | Deleterious   |
| 83 | p.His83Ser | 6.08  | 2.60  | Deleterious   | 6.08  | 2.60  | Deleterious   |
| 83 | p.His83Ile | 6.54  | 2.71  | Deleterious   | 6.54  | 2.71  | Deleterious   |
| 83 | p.His83Met | 2.21  | 1.14  | Deleterious   | 2.21  | 1.14  | Deleterious   |
| 83 | p.His83His | 1.00  | 0.00  | Neutral       | 1.00  | 0.00  | Neutral       |
| 83 | p.His83Gln | 4.00  | 2.00  | Deleterious   | 4.00  | 2.00  | Deleterious   |
| 83 | p.His83Pro | 11.53 | 3.53  | Deleterious   | 11.53 | 3.53  | Deleterious   |
| 83 | p.His83Leu | 5.89  | 2.56  | Deleterious   | 5.89  | 2.56  | Deleterious   |
| 83 | p.His83Asp | 10.71 | 3.42  | Deleterious   | 10.71 | 3.42  | Deleterious   |
| 83 | p.His83Glu | 10.06 | 3.33  | Deleterious   | 10.06 | 3.33  | Deleterious   |
| 83 | p.His83Ala | 2.62  | 1.39  | Deleterious   | 2.62  | 1.39  | Deleterious   |
| 83 | p.His83Gly | 7.34  | 2.87  | Deleterious   | 7.34  | 2.87  | Deleterious   |
| 83 | p.His83Val | 9.70  | 3.28  | Deleterious   | 9.70  | 3.28  | Deleterious   |
| 83 | p.His83Tyr | 10.76 | 3.43  | Deleterious   | 10.76 | 3.43  | Deleterious   |
| 83 | p.His83Cys | 6.85  | 2.78  | Deleterious   | 6.85  | 2.78  | Deleterious   |
| 83 | p.His83Trp | 11.28 | 3.50  | Deleterious   | 11.28 | 3.50  | Deleterious   |
| 83 | p.His83Phe | 6.61  | 2.72  | Deleterious   | 6.61  | 2.72  | Deleterious   |
| 84 | p.Asp84Asn | 15.81 | 3.98  | Deleterious   | 15.81 | 3.98  | Deleterious   |
| 84 | p.Asp84Lys | 22.66 | 4.50  | Deleterious   | 22.66 | 4.50  | Deleterious   |
| 84 | p.Asp84Thr | 16.29 | 4.03  | Deleterious   | 16.29 | 4.03  | Deleterious   |
| 84 | p.Asp84Arg | 22.75 | 4.51  | Deleterious   | 22.75 | 4.51  | Deleterious   |
| 84 | p.Asp84Ser | 6.14  | 2.62  | Deleterious   | 6.14  | 2.62  | Deleterious   |
| 84 | p.Asp84Ile | 23.12 | 4.53  | Deleterious   | 23.12 | 4.53  | Deleterious   |
| 84 | p.Asp84Met | 19.75 | 4.30  | Deleterious   | 19.75 | 4.30  | Deleterious   |
| 84 | p.Asp84His | 9.00  | 3.17  | Deleterious   | 9.00  | 3.17  | Deleterious   |
| 84 | p.Asp84Gln | 11.40 | 3.51  | Deleterious   | 11.40 | 3.51  | Deleterious   |
| 84 | p.Asp84Pro | 22.54 | 4.49  | Deleterious   | 22.54 | 4.49  | Deleterious   |
| 84 | p.Asp84Leu | 23.46 | 4.55  | Deleterious   | 23.46 | 4.55  | Deleterious   |
| 84 | p.Asp84Asp | 1.00  | 0.00  | Neutral       | 1.00  | 0.00  | Neutral       |
| 84 | p.Asp84Glu | 1.50  | 0.59  | Indeterminate | 1.50  | 0.59  | Indeterminate |
| 84 | p.Asp84Ala | 17.18 | 4.10  | Deleterious   | 17.18 | 4.10  | Deleterious   |
| 84 | p.Asp84Gly | 19.24 | 4.27  | Deleterious   | 19.24 | 4.27  | Deleterious   |
| 84 | p.Asp84Val | 20.90 | 4.39  | Deleterious   | 20.90 | 4.39  | Deleterious   |
| 84 | p.Asp84Tyr | 19.97 | 4.32  | Deleterious   | 19.97 | 4.32  | Deleterious   |
| 84 | p.Asp84Cys | 5.90  | 2.56  | Deleterious   | 5.90  | 2.56  | Deleterious   |
| 84 | p.Asp84Trp | 24.74 | 4.63  | Deleterious   | 24.74 | 4.63  | Deleterious   |
| 84 | p.Asp84Phe | 21.67 | 4.44  | Deleterious   | 21.67 | 4.44  | Deleterious   |
| 85 | p.Ala85Asn | 1.29  | 0.37  | Indeterminate | 1.29  | 0.37  | Indeterminate |
| 85 | p.Ala85Lys | 2.25  | 1.17  | Deleterious   | 2.25  | 1.17  | Deleterious   |
| 85 | p.Ala85Thr | 1.44  | 0.53  | Indeterminate | 1.44  | 0.53  | Indeterminate |
| 85 | p.Ala85Arg | 2.24  | 1.16  | Deleterious   | 2.24  | 1.16  | Deleterious   |
| 85 | p.Ala85Ser | 1.08  | 0.11  | Neutral       | 1.08  | 0.11  | Neutral       |
| 85 | p.Ala85Ile | 1.56  | 0.64  | Indeterminate | 1.56  | 0.64  | Indeterminate |
| 85 | p.Ala85Met | 0.77  | -0.37 | Neutral       | 0.77  | -0.37 | Neutral       |
| 85 | p.Ala85His | 1.66  | 0.73  | Indeterminate | 1.66  | 0.73  | Indeterminate |
| 85 | p.Ala85Gln | 1.50  | 0.59  | Indeterminate | 1.50  | 0.59  | Indeterminate |
| 85 | p.Ala85Pro | 1.51  | 0.60  | Indeterminate | 1.51  | 0.60  | Indeterminate |
| 85 | p.Ala85Leu | 1.03  | 0.04  | Neutral       | 1.03  | 0.04  | Neutral       |



|    |            |       |       |               |       |       |               |
|----|------------|-------|-------|---------------|-------|-------|---------------|
| 85 | p.Ala85Asp | 2.03  | 1.02  | Indeterminate | 2.03  | 1.02  | Indeterminate |
| 85 | p.Ala85Glu | 1.96  | 0.97  | Indeterminate | 1.96  | 0.97  | Indeterminate |
| 85 | p.Ala85Ala | 1.00  | 0.00  | Neutral       | 1.00  | 0.00  | Neutral       |
| 85 | p.Ala85Gly | 0.86  | -0.22 | Neutral       | 0.86  | -0.22 | Neutral       |
| 85 | p.Ala85Val | 1.33  | 0.41  | Indeterminate | 1.33  | 0.41  | Indeterminate |
| 85 | p.Ala85Tyr | 1.82  | 0.87  | Indeterminate | 1.82  | 0.87  | Indeterminate |
| 85 | p.Ala85Cys | 0.91  | -0.14 | Neutral       | 0.91  | -0.14 | Neutral       |
| 85 | p.Ala85Trp | 2.44  | 1.29  | Deleterious   | 2.44  | 1.29  | Deleterious   |
| 85 | p.Ala85Phe | 1.95  | 0.96  | Indeterminate | 1.95  | 0.96  | Indeterminate |
| 86 | p.Ala86Asn | 8.60  | 3.10  | Deleterious   | 8.60  | 3.10  | Deleterious   |
| 86 | p.Ala86Lys | 10.11 | 3.34  | Deleterious   | 10.11 | 3.34  | Deleterious   |
| 86 | p.Ala86Thr | 0.79  | -0.34 | Neutral       | 0.79  | -0.34 | Neutral       |
| 86 | p.Ala86Arg | 9.67  | 3.27  | Deleterious   | 9.67  | 3.27  | Deleterious   |
| 86 | p.Ala86Ser | 1.40  | 0.49  | Indeterminate | 1.40  | 0.49  | Indeterminate |
| 86 | p.Ala86Ile | 1.86  | 0.90  | Indeterminate | 1.86  | 0.90  | Indeterminate |
| 86 | p.Ala86Met | 7.54  | 2.92  | Deleterious   | 7.54  | 2.92  | Deleterious   |
| 86 | p.Ala86His | 8.51  | 3.09  | Deleterious   | 8.51  | 3.09  | Deleterious   |
| 86 | p.Ala86Gln | 9.27  | 3.21  | Deleterious   | 9.27  | 3.21  | Deleterious   |
| 86 | p.Ala86Pro | 8.62  | 3.11  | Deleterious   | 8.62  | 3.11  | Deleterious   |
| 86 | p.Ala86Leu | 7.57  | 2.92  | Deleterious   | 7.57  | 2.92  | Deleterious   |
| 86 | p.Ala86Asp | 8.99  | 3.17  | Deleterious   | 8.99  | 3.17  | Deleterious   |
| 86 | p.Ala86Glu | 9.11  | 3.19  | Deleterious   | 9.11  | 3.19  | Deleterious   |
| 86 | p.Ala86Ala | 1.00  | 0.00  | Neutral       | 1.00  | 0.00  | Neutral       |
| 86 | p.Ala86Gly | 0.86  | -0.21 | Neutral       | 0.86  | -0.21 | Neutral       |
| 86 | p.Ala86Val | 1.00  | -0.01 | Neutral       | 1.00  | -0.01 | Neutral       |
| 86 | p.Ala86Tyr | 9.41  | 3.23  | Deleterious   | 9.41  | 3.23  | Deleterious   |
| 86 | p.Ala86Cys | 0.66  | -0.59 | Neutral       | 0.66  | -0.59 | Neutral       |
| 86 | p.Ala86Trp | 8.43  | 3.08  | Deleterious   | 8.43  | 3.08  | Deleterious   |
| 86 | p.Ala86Phe | 8.66  | 3.11  | Deleterious   | 8.66  | 3.11  | Deleterious   |
| 87 | p.Arg87Asn | 1.10  | 0.13  | Neutral       | 1.10  | 0.13  | Neutral       |
| 87 | p.Arg87Lys | 0.39  | -1.37 | Neutral       | 0.39  | -1.37 | Neutral       |
| 87 | p.Arg87Thr | 1.06  | 0.08  | Neutral       | 1.06  | 0.08  | Neutral       |
| 87 | p.Arg87Arg | 1.00  | 0.00  | Neutral       | 1.00  | 0.00  | Neutral       |
| 87 | p.Arg87Ser | 2.13  | 1.09  | Deleterious   | 2.13  | 1.09  | Deleterious   |
| 87 | p.Arg87Ile | 1.13  | 0.17  | Neutral       | 1.13  | 0.17  | Neutral       |
| 87 | p.Arg87Met | 1.70  | 0.77  | Indeterminate | 1.70  | 0.77  | Indeterminate |
| 87 | p.Arg87His | 1.92  | 0.94  | Indeterminate | 1.92  | 0.94  | Indeterminate |
| 87 | p.Arg87Gln | 2.09  | 1.07  | Indeterminate | 2.09  | 1.07  | Indeterminate |
| 87 | p.Arg87Pro | 34.88 | 5.12  | Deleterious   | 34.88 | 5.12  | Deleterious   |
| 87 | p.Arg87Leu | 1.32  | 0.41  | Indeterminate | 1.32  | 0.41  | Indeterminate |
| 87 | p.Arg87Asp | 6.02  | 2.59  | Deleterious   | 6.02  | 2.59  | Deleterious   |
| 87 | p.Arg87Glu | 3.27  | 1.71  | Deleterious   | 3.27  | 1.71  | Deleterious   |
| 87 | p.Arg87Ala | 2.60  | 1.38  | Deleterious   | 2.60  | 1.38  | Deleterious   |
| 87 | p.Arg87Gly | 0.81  | -0.30 | Neutral       | 0.81  | -0.30 | Neutral       |
| 87 | p.Arg87Val | 1.15  | 0.20  | Neutral       | 1.15  | 0.20  | Neutral       |
| 87 | p.Arg87Tyr | 1.81  | 0.86  | Indeterminate | 1.81  | 0.86  | Indeterminate |
| 87 | p.Arg87Cys | 0.74  | -0.43 | Neutral       | 0.74  | -0.43 | Neutral       |
| 87 | p.Arg87Trp | 20.35 | 4.35  | Deleterious   | 20.35 | 4.35  | Deleterious   |
| 87 | p.Arg87Phe | 1.26  | 0.34  | Indeterminate | 1.26  | 0.34  | Indeterminate |
| 88 | p.Glu88Asn | 1.30  | 0.38  | Indeterminate | 1.30  | 0.38  | Indeterminate |
| 88 | p.Glu88Lys | 1.95  | 0.96  | Indeterminate | 1.95  | 0.96  | Indeterminate |
| 88 | p.Glu88Thr | 1.29  | 0.37  | Indeterminate | 1.29  | 0.37  | Indeterminate |
| 88 | p.Glu88Arg | 1.89  | 0.92  | Indeterminate | 1.89  | 0.92  | Indeterminate |
| 88 | p.Glu88Ser | 1.21  | 0.28  | Indeterminate | 1.21  | 0.28  | Indeterminate |
| 88 | p.Glu88Ile | 1.18  | 0.23  | Neutral       | 1.18  | 0.23  | Neutral       |
| 88 | p.Glu88Met | 1.17  | 0.23  | Neutral       | 1.17  | 0.23  | Neutral       |
| 88 | p.Glu88His | 1.40  | 0.49  | Indeterminate | 1.40  | 0.49  | Indeterminate |
| 88 | p.Glu88Gln | 1.27  | 0.35  | Indeterminate | 1.27  | 0.35  | Indeterminate |
| 88 | p.Glu88Pro | 3.13  | 1.65  | Deleterious   | 3.13  | 1.65  | Deleterious   |
| 88 | p.Glu88Leu | 1.37  | 0.45  | Indeterminate | 1.37  | 0.45  | Indeterminate |
| 88 | p.Glu88Asp | 1.36  | 0.44  | Indeterminate | 1.36  | 0.44  | Indeterminate |
| 88 | p.Glu88Glu | 1.00  | 0.00  | Neutral       | 1.00  | 0.00  | Neutral       |
| 88 | p.Glu88Ala | 1.08  | 0.10  | Neutral       | 1.08  | 0.10  | Neutral       |
| 88 | p.Glu88Gly | 1.20  | 0.26  | Indeterminate | 1.20  | 0.26  | Indeterminate |
| 88 | p.Glu88Val | 1.31  | 0.39  | Indeterminate | 1.31  | 0.39  | Indeterminate |
| 88 | p.Glu88Tyr | 1.34  | 0.42  | Indeterminate | 1.34  | 0.42  | Indeterminate |
| 88 | p.Glu88Cys | 1.15  | 0.21  | Neutral       | 1.15  | 0.21  | Neutral       |
| 88 | p.Glu88Trp | 1.20  | 0.26  | Indeterminate | 1.20  | 0.26  | Indeterminate |
| 88 | p.Glu88Phe | 1.41  | 0.49  | Indeterminate | 1.41  | 0.49  | Indeterminate |
| 89 | p.Gly89Asn | 1.78  | 0.83  | Indeterminate | 1.78  | 0.83  | Indeterminate |
| 89 | p.Gly89Lys | 7.99  | 3.00  | Deleterious   | 7.99  | 3.00  | Deleterious   |
| 89 | p.Gly89Thr | 13.14 | 3.72  | Deleterious   | 13.14 | 3.72  | Deleterious   |
| 89 | p.Gly89Arg | 8.98  | 3.17  | Deleterious   | 8.98  | 3.17  | Deleterious   |
| 89 | p.Gly89Ser | 4.06  | 2.02  | Deleterious   | 4.06  | 2.02  | Deleterious   |
| 89 | p.Gly89Ile | 16.30 | 4.03  | Deleterious   | 16.30 | 4.03  | Deleterious   |
| 89 | p.Gly89Met | 11.69 | 3.55  | Deleterious   | 11.69 | 3.55  | Deleterious   |
| 89 | p.Gly89His | 9.73  | 3.28  | Deleterious   | 9.73  | 3.28  | Deleterious   |
| 89 | p.Gly89Gln | 8.25  | 3.04  | Deleterious   | 8.25  | 3.04  | Deleterious   |
| 89 | p.Gly89Pro | 11.31 | 3.50  | Deleterious   | 11.31 | 3.50  | Deleterious   |
| 89 | p.Gly89Leu | 13.57 | 3.76  | Deleterious   | 13.57 | 3.76  | Deleterious   |
| 89 | p.Gly89Asp | 3.52  | 1.82  | Deleterious   | 3.52  | 1.82  | Deleterious   |
| 89 | p.Gly89Glu | 10.29 | 3.36  | Deleterious   | 10.29 | 3.36  | Deleterious   |
| 89 | p.Gly89Ala | 2.07  | 1.05  | Indeterminate | 2.07  | 1.05  | Indeterminate |
| 89 | p.Gly89Gly | 1.00  | 0.00  | Neutral       | 1.00  | 0.00  | Neutral       |
| 89 | p.Gly89Val | 14.96 | 3.90  | Deleterious   | 14.96 | 3.90  | Deleterious   |
| 89 | p.Gly89Tyr | 14.02 | 3.81  | Deleterious   | 14.02 | 3.81  | Deleterious   |
| 89 | p.Gly89Cys | 4.06  | 2.02  | Deleterious   | 4.06  | 2.02  | Deleterious   |
| 89 | p.Gly89Trp | 14.23 | 3.83  | Deleterious   | 14.23 | 3.83  | Deleterious   |
| 89 | p.Gly89Phe | 13.71 | 3.78  | Deleterious   | 13.71 | 3.78  | Deleterious   |
| 90 | p.Phe90Asn | 0.89  | -0.17 | Neutral       | 0.89  | -0.17 | Neutral       |
| 90 | p.Phe90Lys | 1.21  | 0.28  | Indeterminate | 1.21  | 0.28  | Indeterminate |
| 90 | p.Phe90Thr | 1.15  | 0.21  | Neutral       | 1.15  | 0.21  | Neutral       |
| 90 | p.Phe90Arg | 0.96  | -0.06 | Neutral       | 0.96  | -0.06 | Neutral       |
| 90 | p.Phe90Ser | 0.94  | -0.08 | Neutral       | 0.94  | -0.08 | Neutral       |
| 90 | p.Phe90Ile | 0.87  | -0.20 | Neutral       | 0.87  | -0.20 | Neutral       |
| 90 | p.Phe90Met | 0.75  | -0.42 | Neutral       | 0.75  | -0.42 | Neutral       |
| 90 | p.Phe90His | 0.78  | -0.36 | Neutral       | 0.78  | -0.36 | Neutral       |
| 90 | p.Phe90Gln | 0.76  | -0.40 | Neutral       | 0.76  | -0.40 | Neutral       |
| 90 | p.Phe90Pro | 1.62  | 0.70  | Indeterminate | 1.62  | 0.70  | Indeterminate |
| 90 | p.Phe90Leu | 0.78  | -0.36 | Neutral       | 0.78  | -0.36 | Neutral       |
| 90 | p.Phe90Asp | 1.73  | 0.79  | Indeterminate | 1.73  | 0.79  | Indeterminate |
| 90 | p.Phe90Glu | 1.15  | 0.21  | Neutral       | 1.15  | 0.21  | Neutral       |
| 90 | p.Phe90Ala | 0.84  | -0.24 | Neutral       | 0.84  | -0.24 | Neutral       |
| 90 | p.Phe90Gly | 1.01  | 0.02  | Neutral       | 1.01  | 0.02  | Neutral       |
| 90 | p.Phe90Val | 1.11  | 0.15  | Neutral       | 1.11  | 0.15  | Neutral       |
| 90 | p.Phe90Tyr | 0.80  | -0.32 | Neutral       | 0.80  | -0.32 | Neutral       |

|    |            |      |       |               |      |       |               |
|----|------------|------|-------|---------------|------|-------|---------------|
| 90 | p.Phe90Cys | 0.99 | -0.01 | Neutral       | 0.99 | -0.01 | Neutral       |
| 90 | p.Phe90Trp | 0.93 | -0.10 | Neutral       | 0.93 | -0.10 | Neutral       |
| 90 | p.Phe90Phe | 1.00 | 0.00  | Neutral       | 1.00 | 0.00  | Neutral       |
| 91 | p.Leu91Asn | 0.70 | -0.51 | Neutral       | 0.70 | -0.51 | Neutral       |
| 91 | p.Leu91Lys | 1.43 | 0.52  | Indeterminate | 1.43 | 0.52  | Indeterminate |
| 91 | p.Leu91Thr | 1.46 | 0.54  | Indeterminate | 1.46 | 0.54  | Indeterminate |
| 91 | p.Leu91Arg | 1.16 | 0.21  | Neutral       | 1.16 | 0.21  | Neutral       |
| 91 | p.Leu91Ser | 1.94 | 0.96  | Indeterminate | 1.94 | 0.96  | Indeterminate |
| 91 | p.Leu91Ile | 1.70 | 0.76  | Indeterminate | 1.70 | 0.76  | Indeterminate |
| 91 | p.Leu91Met | 2.60 | 1.38  | Deleterious   | 2.60 | 1.38  | Deleterious   |
| 91 | p.Leu91His | 1.68 | 0.75  | Indeterminate | 1.68 | 0.75  | Indeterminate |
| 91 | p.Leu91Gln | 0.79 | -0.33 | Neutral       | 0.79 | -0.33 | Neutral       |
| 91 | p.Leu91Pro | 1.53 | 0.61  | Indeterminate | 1.53 | 0.61  | Indeterminate |
| 91 | p.Leu91Leu | 1.00 | 0.00  | Neutral       | 1.00 | 0.00  | Neutral       |
| 91 | p.Leu91Asp | 1.31 | 0.39  | Indeterminate | 1.31 | 0.39  | Indeterminate |
| 91 | p.Leu91Glu | 1.34 | 0.43  | Indeterminate | 1.34 | 0.43  | Indeterminate |
| 91 | p.Leu91Ala | 1.03 | 0.04  | Neutral       | 1.03 | 0.04  | Neutral       |
| 91 | p.Leu91Gly | 1.39 | 0.47  | Indeterminate | 1.39 | 0.47  | Indeterminate |
| 91 | p.Leu91Val | 1.29 | 0.37  | Indeterminate | 1.29 | 0.37  | Indeterminate |
| 91 | p.Leu91Tyr | 3.09 | 1.63  | Deleterious   | 3.09 | 1.63  | Deleterious   |
| 91 | p.Leu91Cys | 0.96 | -0.05 | Neutral       | 0.96 | -0.05 | Neutral       |
| 91 | p.Leu91Trp | 1.59 | 0.67  | Indeterminate | 1.59 | 0.67  | Indeterminate |
| 91 | p.Leu91Phe | 2.11 | 1.08  | Indeterminate | 2.11 | 1.08  | Indeterminate |
| 92 | p.Asp92Asn | 1.06 | 0.08  | Neutral       | 1.06 | 0.08  | Neutral       |
| 92 | p.Asp92Lys | 1.23 | 0.30  | Indeterminate | 1.23 | 0.30  | Indeterminate |
| 92 | p.Asp92Thr | 0.90 | -0.16 | Neutral       | 0.90 | -0.16 | Neutral       |
| 92 | p.Asp92Arg | 1.02 | 0.03  | Neutral       | 1.02 | 0.03  | Neutral       |
| 92 | p.Asp92Ser | 0.97 | -0.05 | Neutral       | 0.97 | -0.05 | Neutral       |
| 92 | p.Asp92Ile | 1.19 | 0.25  | Indeterminate | 1.19 | 0.25  | Indeterminate |
| 92 | p.Asp92Met | 0.98 | -0.03 | Neutral       | 0.98 | -0.03 | Neutral       |
| 92 | p.Asp92His | 1.09 | 0.13  | Neutral       | 1.09 | 0.13  | Neutral       |
| 92 | p.Asp92Gln | 1.04 | 0.06  | Neutral       | 1.04 | 0.06  | Neutral       |
| 92 | p.Asp92Pro | 1.11 | 0.15  | Neutral       | 1.11 | 0.15  | Neutral       |
| 92 | p.Asp92Leu | 1.02 | 0.02  | Neutral       | 1.02 | 0.02  | Neutral       |
| 92 | p.Asp92Asp | 1.00 | 0.00  | Neutral       | 1.00 | 0.00  | Neutral       |
| 92 | p.Asp92Glu | 1.10 | 0.14  | Neutral       | 1.10 | 0.14  | Neutral       |
| 92 | p.Asp92Ala | 1.12 | 0.17  | Neutral       | 1.12 | 0.17  | Neutral       |
| 92 | p.Asp92Gly | 1.17 | 0.22  | Neutral       | 1.17 | 0.22  | Neutral       |
| 92 | p.Asp92Val | 1.03 | 0.04  | Neutral       | 1.03 | 0.04  | Neutral       |
| 92 | p.Asp92Tyr | 1.04 | 0.05  | Neutral       | 1.04 | 0.05  | Neutral       |
| 92 | p.Asp92Cys | 0.98 | -0.03 | Neutral       | 0.98 | -0.03 | Neutral       |
| 92 | p.Asp92Trp | 1.05 | 0.08  | Neutral       | 1.05 | 0.08  | Neutral       |
| 92 | p.Asp92Phe | 1.21 | 0.28  | Indeterminate | 1.21 | 0.28  | Indeterminate |
| 93 | p.Thr93Asn | 1.83 | 0.87  | Indeterminate | 1.83 | 0.87  | Indeterminate |
| 93 | p.Thr93Lys | 3.80 | 1.93  | Deleterious   | 3.80 | 1.93  | Deleterious   |
| 93 | p.Thr93Thr | 1.00 | 0.00  | Neutral       | 1.00 | 0.00  | Neutral       |
| 93 | p.Thr93Arg | 2.46 | 1.30  | Deleterious   | 2.46 | 1.30  | Deleterious   |
| 93 | p.Thr93Ser | 1.46 | 0.55  | Indeterminate | 1.46 | 0.55  | Indeterminate |
| 93 | p.Thr93Ile | 0.98 | -0.03 | Neutral       | 0.98 | -0.03 | Neutral       |
| 93 | p.Thr93Met | 1.77 | 0.82  | Indeterminate | 1.77 | 0.82  | Indeterminate |
| 93 | p.Thr93His | 2.45 | 1.29  | Deleterious   | 2.45 | 1.29  | Deleterious   |
| 93 | p.Thr93Gln | 2.20 | 1.14  | Deleterious   | 2.20 | 1.14  | Deleterious   |
| 93 | p.Thr93Pro | 6.26 | 2.65  | Deleterious   | 6.26 | 2.65  | Deleterious   |
| 93 | p.Thr93Leu | 1.62 | 0.70  | Indeterminate | 1.62 | 0.70  | Indeterminate |
| 93 | p.Thr93Asp | 2.94 | 1.56  | Deleterious   | 2.94 | 1.56  | Deleterious   |
| 93 | p.Thr93Glu | 2.43 | 1.28  | Deleterious   | 2.43 | 1.28  | Deleterious   |
| 93 | p.Thr93Ala | 2.32 | 1.21  | Deleterious   | 2.32 | 1.21  | Deleterious   |
| 93 | p.Thr93Gly | 2.45 | 1.29  | Deleterious   | 2.45 | 1.29  | Deleterious   |
| 93 | p.Thr93Val | 1.45 | 0.53  | Indeterminate | 1.45 | 0.53  | Indeterminate |
| 93 | p.Thr93Tyr | 2.87 | 1.52  | Deleterious   | 2.87 | 1.52  | Deleterious   |
| 93 | p.Thr93Cys | 1.63 | 0.70  | Indeterminate | 1.63 | 0.70  | Indeterminate |
| 93 | p.Thr93Trp | 2.31 | 1.21  | Deleterious   | 2.31 | 1.21  | Deleterious   |
| 93 | p.Thr93Phe | 1.98 | 0.98  | Indeterminate | 1.98 | 0.98  | Indeterminate |
| 94 | p.Leu94Asn | 2.32 | 1.21  | Deleterious   | 2.32 | 1.21  | Deleterious   |
| 94 | p.Leu94Lys | 6.25 | 2.64  | Deleterious   | 6.25 | 2.64  | Deleterious   |
| 94 | p.Leu94Thr | 2.48 | 1.31  | Deleterious   | 2.48 | 1.31  | Deleterious   |
| 94 | p.Leu94Arg | 8.16 | 3.03  | Deleterious   | 8.16 | 3.03  | Deleterious   |
| 94 | p.Leu94Ser | 0.96 | -0.06 | Neutral       | 0.96 | -0.06 | Neutral       |
| 94 | p.Leu94Ile | 0.69 | -0.54 | Neutral       | 0.69 | -0.54 | Neutral       |
| 94 | p.Leu94Met | 0.42 | -1.25 | Neutral       | 0.42 | -1.25 | Neutral       |
| 94 | p.Leu94His | 8.80 | 3.14  | Deleterious   | 8.80 | 3.14  | Deleterious   |
| 94 | p.Leu94Gln | 4.83 | 2.27  | Deleterious   | 4.83 | 2.27  | Deleterious   |
| 94 | p.Leu94Pro | 5.87 | 2.55  | Deleterious   | 5.87 | 2.55  | Deleterious   |
| 94 | p.Leu94Leu | 1.00 | 0.00  | Neutral       | 1.00 | 0.00  | Neutral       |
| 94 | p.Leu94Asp | 7.73 | 2.95  | Deleterious   | 7.73 | 2.95  | Deleterious   |
| 94 | p.Leu94Glu | 4.47 | 2.16  | Deleterious   | 4.47 | 2.16  | Deleterious   |
| 94 | p.Leu94Ala | 2.30 | 1.20  | Deleterious   | 2.30 | 1.20  | Deleterious   |
| 94 | p.Leu94Gly | 4.46 | 2.16  | Deleterious   | 4.46 | 2.16  | Deleterious   |
| 94 | p.Leu94Val | 1.22 | 0.28  | Indeterminate | 1.22 | 0.28  | Indeterminate |
| 94 | p.Leu94Tyr | 9.51 | 3.25  | Deleterious   | 9.51 | 3.25  | Deleterious   |
| 94 | p.Leu94Cys | 1.83 | 0.87  | Indeterminate | 1.83 | 0.87  | Indeterminate |
| 94 | p.Leu94Trp | 7.26 | 2.86  | Deleterious   | 7.26 | 2.86  | Deleterious   |
| 94 | p.Leu94Phe | 1.87 | 0.91  | Indeterminate | 1.87 | 0.91  | Indeterminate |
| 95 | p.Val95Asn | 1.08 | 0.11  | Neutral       | 1.08 | 0.11  | Neutral       |
| 95 | p.Val95Lys | 0.93 | -0.10 | Neutral       | 0.93 | -0.10 | Neutral       |
| 95 | p.Val95Thr | 0.99 | -0.01 | Neutral       | 0.99 | -0.01 | Neutral       |
| 95 | p.Val95Arg | 1.09 | 0.13  | Neutral       | 1.09 | 0.13  | Neutral       |
| 95 | p.Val95Ser | 1.08 | 0.11  | Neutral       | 1.08 | 0.11  | Neutral       |
| 95 | p.Val95Ile | 0.99 | -0.02 | Neutral       | 0.99 | -0.02 | Neutral       |
| 95 | p.Val95Met | 1.00 | 0.00  | Neutral       | 1.00 | 0.00  | Neutral       |
| 95 | p.Val95His | 0.78 | -0.36 | Neutral       | 0.78 | -0.36 | Neutral       |
| 95 | p.Val95Gln | 0.98 | -0.03 | Neutral       | 0.98 | -0.03 | Neutral       |
| 95 | p.Val95Pro | 4.78 | 2.26  | Deleterious   | 4.78 | 2.26  | Deleterious   |
| 95 | p.Val95Leu | 0.82 | -0.28 | Neutral       | 0.82 | -0.28 | Neutral       |
| 95 | p.Val95Asp | 0.96 | -0.06 | Neutral       | 0.96 | -0.06 | Neutral       |
| 95 | p.Val95Glu | 1.05 | 0.08  | Neutral       | 1.05 | 0.08  | Neutral       |
| 95 | p.Val95Ala | 0.74 | -0.44 | Neutral       | 0.74 | -0.44 | Neutral       |
| 95 | p.Val95Gly | 1.03 | 0.04  | Neutral       | 1.03 | 0.04  | Neutral       |
| 95 | p.Val95Val | 1.00 | 0.00  | Neutral       | 1.00 | 0.00  | Neutral       |
| 95 | p.Val95Tyr | 1.02 | 0.02  | Neutral       | 1.02 | 0.02  | Neutral       |
| 95 | p.Val95Cys | 0.82 | -0.28 | Neutral       | 0.82 | -0.28 | Neutral       |
| 95 | p.Val95Trp | 1.21 | 0.27  | Indeterminate | 1.21 | 0.27  | Indeterminate |
| 95 | p.Val95Phe | 1.11 | 0.15  | Neutral       | 1.11 | 0.15  | Neutral       |
| 96 | p.Val96Asn | 0.75 | -0.41 | Neutral       | 0.99 | -0.02 | Neutral       |
| 96 | p.Val96Lys | 0.89 | -0.17 | Neutral       | 0.92 | -0.13 | Neutral       |
| 96 | p.Val96Thr | 0.69 | -0.53 | Neutral       | 0.81 | -0.31 | Neutral       |

|     |             |       |       |               |      |       |               |       |       |               |
|-----|-------------|-------|-------|---------------|------|-------|---------------|-------|-------|---------------|
| 96  | p.Val96Arg  | 0.85  | -0.24 | Neutral       | 1.02 | 0.02  | Neutral       | 0.93  | -0.10 | Neutral       |
| 96  | p.Val96Ser  | 0.75  | -0.41 | Neutral       | 0.78 | -0.35 | Neutral       | 0.77  | -0.38 | Neutral       |
| 96  | p.Val96Ile  | 0.84  | -0.25 | Neutral       | 1.01 | 0.02  | Neutral       | 0.93  | -0.11 | Neutral       |
| 96  | p.Val96Met  | 0.70  | -0.52 | Neutral       | 0.82 | -0.29 | Neutral       | 0.76  | -0.40 | Neutral       |
| 96  | p.Val96His  | 0.93  | -0.10 | Neutral       | 0.92 | -0.13 | Neutral       | 0.93  | -0.11 | Neutral       |
| 96  | p.Val96Gln  | 0.86  | -0.23 | Neutral       | 1.10 | 0.14  | Neutral       | 0.98  | -0.03 | Neutral       |
| 96  | p.Val96Pro  | 0.93  | -0.10 | Neutral       | 0.87 | -0.20 | Neutral       | 0.90  | -0.15 | Neutral       |
| 96  | p.Val96Leu  | 0.87  | -0.20 | Neutral       | 1.21 | 0.28  | Indeterminate | 1.04  | 0.06  | Neutral       |
| 96  | p.Val96Asp  | 0.82  | -0.29 | Neutral       | 1.26 | 0.33  | Indeterminate | 1.04  | 0.05  | Neutral       |
| 96  | p.Val96Glu  | 0.65  | -0.63 | Neutral       | 1.05 | 0.08  | Neutral       | 0.85  | -0.23 | Neutral       |
| 96  | p.Val96Ala  | 1.10  | 0.14  | Neutral       | 1.53 | 0.62  | Indeterminate | 1.32  | 0.40  | Indeterminate |
| 96  | p.Val96Gly  | 1.13  | 0.18  | Neutral       | 0.86 | -0.22 | Neutral       | 0.99  | -0.01 | Neutral       |
| 96  | p.Val96Val  | 1.00  | 0.00  | Neutral       | 1.00 | 0.00  | Neutral       | 1.00  | 0.00  | Neutral       |
| 96  | p.Val96Tyr  | 0.82  | -0.28 | Neutral       | 1.08 | 0.11  | Neutral       | 0.95  | -0.07 | Neutral       |
| 96  | p.Val96Cys  | 0.82  | -0.28 | Neutral       | 1.37 | 0.45  | Indeterminate | 1.10  | 0.13  | Neutral       |
| 96  | p.Val96Trp  | 0.70  | -0.51 | Neutral       | 1.46 | 0.54  | Indeterminate | 1.08  | 0.11  | Neutral       |
| 96  | p.Val96Phe  | 0.72  | -0.48 | Neutral       | 1.08 | 0.11  | Neutral       | 0.90  | -0.15 | Neutral       |
| 97  | p.Leu97Asn  | 7.43  | 2.89  | Deleterious   |      |       |               | 7.43  | 2.89  | Deleterious   |
| 97  | p.Leu97Lys  | 8.27  | 3.05  | Deleterious   |      |       |               | 8.27  | 3.05  | Deleterious   |
| 97  | p.Leu97Thr  | 5.89  | 2.56  | Deleterious   |      |       |               | 5.89  | 2.56  | Deleterious   |
| 97  | p.Leu97Arg  | 8.53  | 3.09  | Deleterious   |      |       |               | 8.53  | 3.09  | Deleterious   |
| 97  | p.Leu97Ser  | 7.64  | 2.93  | Deleterious   |      |       |               | 7.64  | 2.93  | Deleterious   |
| 97  | p.Leu97Ile  | 0.85  | -0.24 | Neutral       |      |       |               | 0.85  | -0.24 | Neutral       |
| 97  | p.Leu97Met  | 0.69  | -0.53 | Neutral       |      |       |               | 0.69  | -0.53 | Neutral       |
| 97  | p.Leu97His  | 6.20  | 2.63  | Deleterious   |      |       |               | 6.20  | 2.63  | Deleterious   |
| 97  | p.Leu97Gln  | 4.19  | 2.07  | Deleterious   |      |       |               | 4.19  | 2.07  | Deleterious   |
| 97  | p.Leu97Pro  | 8.72  | 3.12  | Deleterious   |      |       |               | 8.72  | 3.12  | Deleterious   |
| 97  | p.Leu97Leu  | 1.00  | 0.00  | Neutral       |      |       |               | 1.00  | 0.00  | Neutral       |
| 97  | p.Leu97Asp  | 8.74  | 3.13  | Deleterious   |      |       |               | 8.74  | 3.13  | Deleterious   |
| 97  | p.Leu97Glu  | 6.81  | 2.77  | Deleterious   |      |       |               | 6.81  | 2.77  | Deleterious   |
| 97  | p.Leu97Ala  | 4.79  | 2.26  | Deleterious   |      |       |               | 4.79  | 2.26  | Deleterious   |
| 97  | p.Leu97Gly  | 8.76  | 3.13  | Deleterious   |      |       |               | 8.76  | 3.13  | Deleterious   |
| 97  | p.Leu97Val  | 1.68  | 0.75  | Indeterminate |      |       |               | 1.68  | 0.75  | Indeterminate |
| 97  | p.Leu97Tyr  | 1.01  | 0.01  | Neutral       |      |       |               | 1.01  | 0.01  | Neutral       |
| 97  | p.Leu97Cys  | 1.03  | 0.04  | Neutral       |      |       |               | 1.03  | 0.04  | Neutral       |
| 97  | p.Leu97Trp  | 6.72  | 2.75  | Deleterious   |      |       |               | 6.72  | 2.75  | Deleterious   |
| 97  | p.Leu97Phe  | 0.92  | -0.12 | Neutral       |      |       |               | 0.92  | -0.12 | Neutral       |
| 98  | p.His98Asn  | 1.02  | 0.02  | Neutral       |      |       |               | 1.02  | 0.02  | Neutral       |
| 98  | p.His98Lys  | 0.92  | -0.12 | Neutral       |      |       |               | 0.92  | -0.12 | Neutral       |
| 98  | p.His98Thr  | 1.07  | 0.10  | Neutral       |      |       |               | 1.07  | 0.10  | Neutral       |
| 98  | p.His98Arg  | 1.00  | 0.00  | Neutral       |      |       |               | 1.00  | 0.00  | Neutral       |
| 98  | p.His98Ser  | 1.29  | 0.37  | Indeterminate |      |       |               | 1.29  | 0.37  | Indeterminate |
| 98  | p.His98Ile  | 0.98  | -0.03 | Neutral       |      |       |               | 0.98  | -0.03 | Neutral       |
| 98  | p.His98Met  | 0.97  | -0.04 | Neutral       |      |       |               | 0.97  | -0.04 | Neutral       |
| 98  | p.His98His  | 1.00  | 0.00  | Neutral       |      |       |               | 1.00  | 0.00  | Neutral       |
| 98  | p.His98Gln  | 1.19  | 0.25  | Indeterminate |      |       |               | 1.19  | 0.25  | Indeterminate |
| 98  | p.His98Pro  | 5.39  | 2.43  | Deleterious   |      |       |               | 5.39  | 2.43  | Deleterious   |
| 98  | p.His98Leu  | 1.15  | 0.21  | Neutral       |      |       |               | 1.15  | 0.21  | Neutral       |
| 98  | p.His98Asp  | 1.26  | 0.34  | Indeterminate |      |       |               | 1.26  | 0.34  | Indeterminate |
| 98  | p.His98Glu  | 1.04  | 0.06  | Neutral       |      |       |               | 1.04  | 0.06  | Neutral       |
| 98  | p.His98Ala  | 0.93  | -0.10 | Neutral       |      |       |               | 0.93  | -0.10 | Neutral       |
| 98  | p.His98Gly  | 1.16  | 0.21  | Neutral       |      |       |               | 1.16  | 0.21  | Neutral       |
| 98  | p.His98Val  | 1.07  | 0.10  | Neutral       |      |       |               | 1.07  | 0.10  | Neutral       |
| 98  | p.His98Tyr  | 1.07  | 0.10  | Neutral       |      |       |               | 1.07  | 0.10  | Neutral       |
| 98  | p.His98Cys  | 1.09  | 0.12  | Neutral       |      |       |               | 1.09  | 0.12  | Neutral       |
| 98  | p.His98Trp  | 0.94  | -0.10 | Neutral       |      |       |               | 0.94  | -0.10 | Neutral       |
| 98  | p.His98Phe  | 0.94  | -0.08 | Neutral       |      |       |               | 0.94  | -0.08 | Neutral       |
| 99  | p.Arg99Asn  | 1.39  | 0.47  | Indeterminate |      |       |               | 1.39  | 0.47  | Indeterminate |
| 99  | p.Arg99Lys  | 1.20  | 0.26  | Indeterminate |      |       |               | 1.20  | 0.26  | Indeterminate |
| 99  | p.Arg99Thr  | 1.46  | 0.55  | Indeterminate |      |       |               | 1.46  | 0.55  | Indeterminate |
| 99  | p.Arg99Arg  | 1.00  | 0.00  | Neutral       |      |       |               | 1.00  | 0.00  | Neutral       |
| 99  | p.Arg99Ser  | 1.46  | 0.54  | Indeterminate |      |       |               | 1.46  | 0.54  | Indeterminate |
| 99  | p.Arg99Ile  | 1.26  | 0.33  | Indeterminate |      |       |               | 1.26  | 0.33  | Indeterminate |
| 99  | p.Arg99Met  | 1.60  | 0.68  | Indeterminate |      |       |               | 1.60  | 0.68  | Indeterminate |
| 99  | p.Arg99His  | 0.94  | -0.09 | Neutral       |      |       |               | 0.94  | -0.09 | Neutral       |
| 99  | p.Arg99Gln  | 0.92  | -0.11 | Neutral       |      |       |               | 0.92  | -0.11 | Neutral       |
| 99  | p.Arg99Pro  | 38.44 | 5.26  | Deleterious   |      |       |               | 38.44 | 5.26  | Deleterious   |
| 99  | p.Arg99Leu  | 1.72  | 0.78  | Indeterminate |      |       |               | 1.72  | 0.78  | Indeterminate |
| 99  | p.Arg99Asp  | 1.92  | 0.94  | Indeterminate |      |       |               | 1.92  | 0.94  | Indeterminate |
| 99  | p.Arg99Glu  | 1.40  | 0.48  | Indeterminate |      |       |               | 1.40  | 0.48  | Indeterminate |
| 99  | p.Arg99Ala  | 2.31  | 1.21  | Deleterious   |      |       |               | 2.31  | 1.21  | Deleterious   |
| 99  | p.Arg99Gly  | 1.02  | 0.03  | Neutral       |      |       |               | 1.02  | 0.03  | Neutral       |
| 99  | p.Arg99Val  | 2.27  | 1.18  | Deleterious   |      |       |               | 2.27  | 1.18  | Deleterious   |
| 99  | p.Arg99Tyr  | 1.06  | 0.09  | Neutral       |      |       |               | 1.06  | 0.09  | Neutral       |
| 99  | p.Arg99Cys  | 1.77  | 0.82  | Indeterminate |      |       |               | 1.77  | 0.82  | Indeterminate |
| 99  | p.Arg99Trp  | 1.83  | 0.87  | Indeterminate |      |       |               | 1.83  | 0.87  | Indeterminate |
| 99  | p.Arg99Phe  | 1.14  | 0.19  | Neutral       |      |       |               | 1.14  | 0.19  | Neutral       |
| 100 | p.Ala100Asn | 1.10  | 0.13  | Neutral       |      |       |               | 1.10  | 0.13  | Neutral       |
| 100 | p.Ala100Lys | 0.94  | -0.09 | Neutral       |      |       |               | 0.94  | -0.09 | Neutral       |
| 100 | p.Ala100Thr | 1.34  | 0.42  | Indeterminate |      |       |               | 1.34  | 0.42  | Indeterminate |
| 100 | p.Ala100Arg | 0.92  | -0.12 | Neutral       |      |       |               | 0.92  | -0.12 | Neutral       |
| 100 | p.Ala100Ser | 0.74  | -0.44 | Neutral       |      |       |               | 0.74  | -0.44 | Neutral       |
| 100 | p.Ala100Ile | 1.05  | 0.06  | Neutral       |      |       |               | 1.05  | 0.06  | Neutral       |
| 100 | p.Ala100Met | 1.30  | 0.38  | Indeterminate |      |       |               | 1.30  | 0.38  | Indeterminate |
| 100 | p.Ala100His | 0.79  | -0.35 | Neutral       |      |       |               | 0.79  | -0.35 | Neutral       |
| 100 | p.Ala100Gln | 1.02  | 0.03  | Neutral       |      |       |               | 1.02  | 0.03  | Neutral       |
| 100 | p.Ala100Pro | 13.53 | 3.76  | Deleterious   |      |       |               | 13.53 | 3.76  | Deleterious   |
| 100 | p.Ala100Leu | 0.87  | -0.20 | Neutral       |      |       |               | 0.87  | -0.20 | Neutral       |
| 100 | p.Ala100Asp | 0.73  | -0.45 | Neutral       |      |       |               | 0.73  | -0.45 | Neutral       |
| 100 | p.Ala100Glu | 1.75  | 0.81  | Indeterminate |      |       |               | 1.75  | 0.81  | Indeterminate |
| 100 | p.Ala100Ala | 1.00  | 0.00  | Neutral       |      |       |               | 1.00  | 0.00  | Neutral       |
| 100 | p.Ala100Gly | 3.88  | 1.95  | Deleterious   |      |       |               | 3.88  | 1.95  | Deleterious   |
| 100 | p.Ala100Val | 0.82  | -0.29 | Neutral       |      |       |               | 0.82  | -0.29 | Neutral       |
| 100 | p.Ala100Tyr | 1.16  | 0.22  | Neutral       |      |       |               | 1.16  | 0.22  | Neutral       |
| 100 | p.Ala100Cys | 0.64  | -0.64 | Neutral       |      |       |               | 0.64  | -0.64 | Neutral       |
| 100 | p.Ala100Trp | 0.77  | -0.38 | Neutral       |      |       |               | 0.77  | -0.38 | Neutral       |
| 100 | p.Ala100Phe | 0.74  | -0.44 | Neutral       |      |       |               | 0.74  | -0.44 | Neutral       |
| 101 | p.Gly101Asn | 1.44  | 0.52  | Indeterminate |      |       |               | 1.44  | 0.52  | Indeterminate |
| 101 | p.Gly101Lys | 1.85  | 0.89  | Indeterminate |      |       |               | 1.85  | 0.89  | Indeterminate |
| 101 | p.Gly101Thr | 2.15  | 1.11  | Deleterious   |      |       |               | 2.15  | 1.11  | Deleterious   |
| 101 | p.Gly101Arg | 1.68  | 0.75  | Indeterminate |      |       |               | 1.68  | 0.75  | Indeterminate |
| 101 | p.Gly101Ser | 1.58  | 0.66  | Indeterminate |      |       |               | 1.58  | 0.66  | Indeterminate |
| 101 | p.Gly101Ile | 9.59  | 3.26  | Deleterious   |      |       |               | 9.59  | 3.26  | Deleterious   |
| 101 | p.Gly101Met | 2.07  | 1.05  | Indeterminate |      |       |               | 2.07  | 1.05  | Indeterminate |
| 101 | p.Gly101His | 1.59  | 0.67  | Indeterminate |      |       |               | 1.59  | 0.67  | Indeterminate |
| 101 | p.Gly101Gln | 1.58  | 0.66  | Indeterminate |      |       |               | 1.58  | 0.66  | Indeterminate |

|     |             |       |       |               |      |       |               |       |               |               |
|-----|-------------|-------|-------|---------------|------|-------|---------------|-------|---------------|---------------|
| 101 | p.Gly101Pro | 8.50  | 3.09  | Deleterious   |      |       | 8.50          | 3.09  | Deleterious   |               |
| 101 | p.Gly101Leu | 3.51  | 1.81  | Deleterious   |      |       | 3.51          | 1.81  | Deleterious   |               |
| 101 | p.Gly101Asp | 1.31  | 0.39  | Indeterminate |      |       | 1.31          | 0.39  | Indeterminate |               |
| 101 | p.Gly101Glu | 1.85  | 0.89  | Indeterminate |      |       | 1.85          | 0.89  | Indeterminate |               |
| 101 | p.Gly101Ala | 1.61  | 0.68  | Indeterminate |      |       | 1.61          | 0.68  | Indeterminate |               |
| 101 | p.Gly101Gly | 1.00  | 0.00  | Neutral       |      |       | 1.00          | 0.00  | Neutral       |               |
| 101 | p.Gly101Val | 8.71  | 3.12  | Deleterious   |      |       | 8.71          | 3.12  | Deleterious   |               |
| 101 | p.Gly101Tyr | 2.53  | 1.34  | Deleterious   |      |       | 2.53          | 1.34  | Deleterious   |               |
| 101 | p.Gly101Cys | 1.65  | 0.72  | Indeterminate |      |       | 1.65          | 0.72  | Indeterminate |               |
| 101 | p.Gly101Trp | 4.49  | 2.17  | Deleterious   |      |       | 4.49          | 2.17  | Deleterious   |               |
| 101 | p.Gly101Phe | 2.19  | 1.13  | Deleterious   |      |       | 2.19          | 1.13  | Deleterious   |               |
| 102 | p.Ala102Asn | 10.55 | 3.40  | Deleterious   |      |       | 10.55         | 3.40  | Deleterious   |               |
| 102 | p.Ala102Lys | 27.85 | 4.80  | Deleterious   |      |       | 27.85         | 4.80  | Deleterious   |               |
| 102 | p.Ala102Thr | 11.34 | 3.50  | Deleterious   |      |       | 11.34         | 3.50  | Deleterious   |               |
| 102 | p.Ala102Arg | 46.34 | 5.53  | Deleterious   |      |       | 46.34         | 5.53  | Deleterious   |               |
| 102 | p.Ala102Ser | 2.38  | 1.25  | Deleterious   |      |       | 2.38          | 1.25  | Deleterious   |               |
| 102 | p.Ala102Ile | 18.46 | 4.21  | Deleterious   |      |       | 18.46         | 4.21  | Deleterious   |               |
| 102 | p.Ala102Met | 27.54 | 4.78  | Deleterious   |      |       | 27.54         | 4.78  | Deleterious   |               |
| 102 | p.Ala102His | 17.65 | 4.14  | Deleterious   |      |       | 17.65         | 4.14  | Deleterious   |               |
| 102 | p.Ala102Gln | 25.99 | 4.70  | Deleterious   |      |       | 25.99         | 4.70  | Deleterious   |               |
| 102 | p.Ala102Pro | 30.62 | 4.94  | Deleterious   |      |       | 30.62         | 4.94  | Deleterious   |               |
| 102 | p.Ala102Leu | 39.02 | 5.29  | Deleterious   |      |       | 39.02         | 5.29  | Deleterious   |               |
| 102 | p.Ala102Asp | 27.75 | 4.79  | Deleterious   |      |       | 27.75         | 4.79  | Deleterious   |               |
| 102 | p.Ala102Glu | 36.84 | 5.20  | Deleterious   |      |       | 36.84         | 5.20  | Deleterious   |               |
| 102 | p.Ala102Ala | 1.00  | 0.00  | Neutral       |      |       | 1.00          | 0.00  | Neutral       |               |
| 102 | p.Ala102Gly | 0.56  | -0.83 | Neutral       |      |       | 0.56          | -0.83 | Neutral       |               |
| 102 | p.Ala102Val | 2.29  | 1.20  | Deleterious   |      |       | 2.29          | 1.20  | Deleterious   |               |
| 102 | p.Ala102Tyr | 44.70 | 5.48  | Deleterious   |      |       | 44.70         | 5.48  | Deleterious   |               |
| 102 | p.Ala102Cys | 1.34  | 0.42  | Indeterminate |      |       | 1.34          | 0.42  | Indeterminate |               |
| 102 | p.Ala102Trp | 33.48 | 5.07  | Deleterious   |      |       | 33.48         | 5.07  | Deleterious   |               |
| 102 | p.Ala102Phe | 38.33 | 5.26  | Deleterious   |      |       | 38.33         | 5.26  | Deleterious   |               |
| 103 | p.Arg103Asn | 0.96  | -0.06 | Neutral       |      |       | 0.96          | -0.06 | Neutral       |               |
| 103 | p.Arg103Lys | 1.02  | 0.02  | Neutral       |      |       | 1.02          | 0.02  | Neutral       |               |
| 103 | p.Arg103Thr | 1.50  | 0.59  | Indeterminate |      |       | 1.50          | 0.59  | Indeterminate |               |
| 103 | p.Arg103Arg | 1.00  | 0.00  | Neutral       |      |       | 1.00          | 0.00  | Neutral       |               |
| 103 | p.Arg103Ser | 0.63  | -0.67 | Neutral       |      |       | 0.63          | -0.67 | Neutral       |               |
| 103 | p.Arg103Ile | 1.31  | 0.39  | Indeterminate |      |       | 1.31          | 0.39  | Indeterminate |               |
| 103 | p.Arg103Met | 1.03  | 0.04  | Neutral       |      |       | 1.03          | 0.04  | Neutral       |               |
| 103 | p.Arg103His | 0.82  | -0.28 | Neutral       |      |       | 0.82          | -0.28 | Neutral       |               |
| 103 | p.Arg103Gln | 0.99  | -0.02 | Neutral       |      |       | 0.99          | -0.02 | Neutral       |               |
| 103 | p.Arg103Pro | 0.81  | -0.30 | Neutral       |      |       | 0.81          | -0.30 | Neutral       |               |
| 103 | p.Arg103Leu | 0.65  | -0.62 | Neutral       |      |       | 0.65          | -0.62 | Neutral       |               |
| 103 | p.Arg103Asp | 0.73  | -0.45 | Neutral       |      |       | 0.73          | -0.45 | Neutral       |               |
| 103 | p.Arg103Glu | 0.80  | -0.33 | Neutral       |      |       | 0.80          | -0.33 | Neutral       |               |
| 103 | p.Arg103Ala | 0.81  | -0.31 | Neutral       |      |       | 0.81          | -0.31 | Neutral       |               |
| 103 | p.Arg103Gly | 0.96  | -0.05 | Neutral       |      |       | 0.96          | -0.05 | Neutral       |               |
| 103 | p.Arg103Val | 0.85  | -0.23 | Neutral       |      |       | 0.85          | -0.23 | Neutral       |               |
| 103 | p.Arg103Tyr | 1.09  | 0.12  | Neutral       |      |       | 1.09          | 0.12  | Neutral       |               |
| 103 | p.Arg103Cys | 1.05  | 0.08  | Neutral       |      |       | 1.05          | 0.08  | Neutral       |               |
| 103 | p.Arg103Trp | 0.90  | -0.16 | Neutral       |      |       | 0.90          | -0.16 | Neutral       |               |
| 103 | p.Arg103Phe | 0.92  | -0.12 | Neutral       |      |       | 0.92          | -0.12 | Neutral       |               |
| 104 | p.Leu104Asn | 0.44  | -1.17 | Neutral       |      |       | 0.44          | -1.17 | Neutral       |               |
| 104 | p.Leu104Lys | 2.06  | 1.04  | Indeterminate |      |       | 2.06          | 1.04  | Indeterminate |               |
| 104 | p.Leu104Thr | 0.46  | -1.11 | Neutral       |      |       | 0.46          | -1.11 | Neutral       |               |
| 104 | p.Leu104Arg | 4.06  | 2.02  | Deleterious   |      |       | 4.06          | 2.02  | Deleterious   |               |
| 104 | p.Leu104Ser | 0.37  | -1.43 | Neutral       |      |       | 0.37          | -1.43 | Neutral       |               |
| 104 | p.Leu104Ile | 0.22  | -2.16 | Neutral       |      |       | 0.22          | -2.16 | Neutral       |               |
| 104 | p.Leu104Met | 0.23  | -2.10 | Neutral       |      |       | 0.23          | -2.10 | Neutral       |               |
| 104 | p.Leu104His | 0.30  | -1.73 | Neutral       |      |       | 0.30          | -1.73 | Neutral       |               |
| 104 | p.Leu104Gln | 0.74  | -0.43 | Neutral       |      |       | 0.74          | -0.43 | Neutral       |               |
| 104 | p.Leu104Pro | 0.51  | -0.99 | Neutral       |      |       | 0.51          | -0.99 | Neutral       |               |
| 104 | p.Leu104Leu | 1.00  | 0.00  | Neutral       |      |       | 1.00          | 0.00  | Neutral       |               |
| 104 | p.Leu104Asp | 0.46  | -1.13 | Neutral       |      |       | 0.46          | -1.13 | Neutral       |               |
| 104 | p.Leu104Glu | 0.72  | -0.48 | Neutral       |      |       | 0.72          | -0.48 | Neutral       |               |
| 104 | p.Leu104Ala | 0.20  | -2.33 | Neutral       |      |       | 0.20          | -2.33 | Neutral       |               |
| 104 | p.Leu104Gly | 4.15  | 2.05  | Deleterious   |      |       | 4.15          | 2.05  | Deleterious   |               |
| 104 | p.Leu104Val | 0.14  | -2.87 | Neutral       |      |       | 0.14          | -2.87 | Neutral       |               |
| 104 | p.Leu104Tyr | 0.20  | -2.29 | Neutral       |      |       | 0.20          | -2.29 | Neutral       |               |
| 104 | p.Leu104Cys | 0.24  | -2.04 | Neutral       |      |       | 0.24          | -2.04 | Neutral       |               |
| 104 | p.Leu104Trp | 0.10  | -3.32 | Neutral       |      |       | 0.10          | -3.32 | Neutral       |               |
| 104 | p.Leu104Phe | 0.10  | -3.34 | Neutral       |      |       | 0.10          | -3.34 | Neutral       |               |
| 105 | p.Asp105Asn | 1.03  | 0.05  | Neutral       |      |       | 1.03          | 0.05  | Neutral       |               |
| 105 | p.Asp105Lys | 1.92  | 0.94  | Indeterminate |      |       | 1.92          | 0.94  | Indeterminate |               |
| 105 | p.Asp105Thr | 1.45  | 0.53  | Indeterminate |      |       | 1.45          | 0.53  | Indeterminate |               |
| 105 | p.Asp105Arg | 2.45  | 1.29  | Deleterious   |      |       | 2.45          | 1.29  | Deleterious   |               |
| 105 | p.Asp105Ser | 2.08  | 1.06  | Indeterminate |      |       | 2.08          | 1.06  | Indeterminate |               |
| 105 | p.Asp105Ile | 2.64  | 1.40  | Deleterious   |      |       | 2.64          | 1.40  | Deleterious   |               |
| 105 | p.Asp105Met | 1.49  | 0.57  | Indeterminate |      |       | 1.49          | 0.57  | Indeterminate |               |
| 105 | p.Asp105His | 1.65  | 0.72  | Indeterminate |      |       | 1.65          | 0.72  | Indeterminate |               |
| 105 | p.Asp105Gln | 1.87  | 0.90  | Indeterminate |      |       | 1.87          | 0.90  | Indeterminate |               |
| 105 | p.Asp105Pro | 9.48  | 3.25  | Deleterious   |      |       | 9.48          | 3.25  | Deleterious   |               |
| 105 | p.Asp105Leu | 1.85  | 0.89  | Indeterminate |      |       | 1.85          | 0.89  | Indeterminate |               |
| 105 | p.Asp105Asp | 1.00  | 0.00  | Neutral       |      |       | 1.00          | 0.00  | Neutral       |               |
| 105 | p.Asp105Glu | 2.10  | 1.07  | Indeterminate |      |       | 2.10          | 1.07  | Indeterminate |               |
| 105 | p.Asp105Ala | 1.39  | 0.48  | Indeterminate |      |       | 1.39          | 0.48  | Indeterminate |               |
| 105 | p.Asp105Gly | 2.69  | 1.43  | Deleterious   |      |       | 2.69          | 1.43  | Deleterious   |               |
| 105 | p.Asp105Val | 2.38  | 1.25  | Deleterious   |      |       | 2.38          | 1.25  | Deleterious   |               |
| 105 | p.Asp105Tyr | 0.54  | -0.90 | Neutral       |      |       | 0.54          | -0.90 | Neutral       |               |
| 105 | p.Asp105Cys | 0.58  | -0.79 | Neutral       |      |       | 0.58          | -0.79 | Neutral       |               |
| 105 | p.Asp105Trp | 1.37  | 0.46  | Indeterminate |      |       | 1.37          | 0.46  | Indeterminate |               |
| 105 | p.Asp105Phe | 1.80  | 0.85  | Indeterminate |      |       | 1.80          | 0.85  | Indeterminate |               |
| 106 | p.Val106Asn | 1.34  | 0.43  | Indeterminate | 1.20 | 0.26  | Indeterminate | 1.27  | 0.35          | Indeterminate |
| 106 | p.Val106Lys | 1.74  | 0.80  | Indeterminate | 1.13 | 0.17  | Neutral       | 1.43  | 0.52          | Indeterminate |
| 106 | p.Val106Thr | 0.96  | -0.05 | Neutral       | 1.03 | 0.04  | Neutral       | 1.00  | -0.01         | Neutral       |
| 106 | p.Val106Arg | 1.68  | 0.75  | Indeterminate | 0.93 | -0.11 | Neutral       | 1.30  | 0.38          | Indeterminate |
| 106 | p.Val106Ser | 1.08  | 0.11  | Neutral       | 0.98 | -0.03 | Neutral       | 1.03  | 0.04          | Neutral       |
| 106 | p.Val106Ile | 0.67  | -0.57 | Neutral       | 1.16 | 0.22  | Neutral       | 0.92  | -0.12         | Neutral       |
| 106 | p.Val106Met | 1.00  | 0.00  | Neutral       | 1.06 | 0.08  | Neutral       | 1.03  | 0.04          | Neutral       |
| 106 | p.Val106His | 0.96  | -0.06 | Neutral       | 1.06 | 0.08  | Neutral       | 1.01  | 0.02          | Neutral       |
| 106 | p.Val106Gln | 0.74  | -0.43 | Neutral       | 1.25 | 0.32  | Indeterminate | 0.99  | -0.01         | Neutral       |
| 106 | p.Val106Pro | 1.70  | 0.76  | Indeterminate | 1.14 | 0.19  | Neutral       | 1.42  | 0.51          | Indeterminate |
| 106 | p.Val106Leu | 1.21  | 0.27  | Indeterminate | 1.05 | 0.07  | Neutral       | 1.13  | 0.17          | Neutral       |
| 106 | p.Val106Asp | 0.98  | -0.03 | Neutral       | 1.21 | 0.28  | Indeterminate | 1.10  | 0.13          | Neutral       |
| 106 | p.Val106Glu | 1.58  | 0.66  | Indeterminate | 1.07 | 0.10  | Neutral       | 1.33  | 0.41          | Indeterminate |
| 106 | p.Val106Ala | 1.47  | 0.55  | Indeterminate | 1.14 | 0.19  | Neutral       | 1.30  | 0.38          | Indeterminate |
| 106 | p.Val106Gly | 1.55  | 0.63  | Indeterminate | 0.95 | -0.08 | Neutral       | 1.25  | 0.32          | Indeterminate |



|     |             |       |       |               |      |       |               |       |               |               |
|-----|-------------|-------|-------|---------------|------|-------|---------------|-------|---------------|---------------|
| 112 | p.Arg112Lys | 1.20  | 0.27  | Indeterminate |      |       | 1.20          | 0.27  | Indeterminate |               |
| 112 | p.Arg112Thr | 0.90  | -0.16 | Neutral       |      |       | 0.90          | -0.16 | Neutral       |               |
| 112 | p.Arg112Arg | 1.00  | 0.00  | Neutral       |      |       | 1.00          | 0.00  | Neutral       |               |
| 112 | p.Arg112Ser | 0.97  | -0.05 | Neutral       |      |       | 0.97          | -0.05 | Neutral       |               |
| 112 | p.Arg112Ile | 1.16  | 0.21  | Neutral       |      |       | 1.16          | 0.21  | Neutral       |               |
| 112 | p.Arg112Met | 0.66  | -0.61 | Neutral       |      |       | 0.66          | -0.61 | Neutral       |               |
| 112 | p.Arg112His | 1.17  | 0.22  | Neutral       |      |       | 1.17          | 0.22  | Neutral       |               |
| 112 | p.Arg112Gln | 1.29  | 0.37  | Indeterminate |      |       | 1.29          | 0.37  | Indeterminate |               |
| 112 | p.Arg112Pro | 40.46 | 5.34  | Deleterious   |      |       | 40.46         | 5.34  | Deleterious   |               |
| 112 | p.Arg112Leu | 1.87  | 0.90  | Indeterminate |      |       | 1.87          | 0.90  | Indeterminate |               |
| 112 | p.Arg112Asp | 1.48  | 0.56  | Indeterminate |      |       | 1.48          | 0.56  | Indeterminate |               |
| 112 | p.Arg112Glu | 1.80  | 0.85  | Indeterminate |      |       | 1.80          | 0.85  | Indeterminate |               |
| 112 | p.Arg112Ala | 1.35  | 0.43  | Indeterminate |      |       | 1.35          | 0.43  | Indeterminate |               |
| 112 | p.Arg112Gly | 2.33  | 1.22  | Deleterious   |      |       | 2.33          | 1.22  | Deleterious   |               |
| 112 | p.Arg112Val | 1.41  | 0.49  | Indeterminate |      |       | 1.41          | 0.49  | Indeterminate |               |
| 112 | p.Arg112Tyr | 1.16  | 0.22  | Neutral       |      |       | 1.16          | 0.22  | Neutral       |               |
| 112 | p.Arg112Cys | 1.60  | 0.68  | Indeterminate |      |       | 1.60          | 0.68  | Indeterminate |               |
| 112 | p.Arg112Trp | 1.15  | 0.20  | Neutral       |      |       | 1.15          | 0.20  | Neutral       |               |
| 112 | p.Arg112Phe | 1.42  | 0.51  | Indeterminate |      |       | 1.42          | 0.51  | Indeterminate |               |
| 113 | p.Leu113Asn | 1.12  | 0.16  | Neutral       | 1.17 | 0.22  | Neutral       | 1.14  | 0.19          | Neutral       |
| 113 | p.Leu113Lys | 1.07  | 0.10  | Neutral       | 0.79 | -0.35 | Neutral       | 0.93  | -0.11         | Neutral       |
| 113 | p.Leu113Thr | 1.25  | 0.33  | Indeterminate | 0.96 | -0.06 | Neutral       | 1.10  | 0.14          | Neutral       |
| 113 | p.Leu113Arg | 1.23  | 0.30  | Indeterminate | 0.81 | -0.31 | Neutral       | 1.02  | 0.03          | Neutral       |
| 113 | p.Leu113Ser | 1.09  | 0.12  | Neutral       | 0.76 | -0.39 | Neutral       | 0.92  | -0.11         | Neutral       |
| 113 | p.Leu113Ile | 1.16  | 0.21  | Neutral       | 0.66 | -0.59 | Neutral       | 0.91  | -0.14         | Neutral       |
| 113 | p.Leu113Met | 0.81  | -0.30 | Neutral       | 1.33 | 0.41  | Indeterminate | 1.07  | 0.10          | Neutral       |
| 113 | p.Leu113His | 1.32  | 0.40  | Indeterminate | 1.21 | 0.27  | Indeterminate | 1.27  | 0.34          | Indeterminate |
| 113 | p.Leu113Gln | 1.06  | 0.09  | Neutral       | 0.31 | -1.70 | Neutral       | 0.68  | -0.55         | Neutral       |
| 113 | p.Leu113Pro | 1.56  | 0.64  | Indeterminate | 1.38 | 0.47  | Indeterminate | 1.47  | 0.56          | Indeterminate |
| 113 | p.Leu113Leu | 1.00  | 0.00  | Neutral       | 1.00 | 0.00  | Neutral       | 1.00  | 0.00          | Neutral       |
| 113 | p.Leu113Asp | 1.17  | 0.23  | Neutral       | 0.97 | -0.05 | Neutral       | 1.07  | 0.10          | Neutral       |
| 113 | p.Leu113Glu | 0.94  | -0.09 | Neutral       | 1.02 | 0.03  | Neutral       | 0.98  | -0.03         | Neutral       |
| 113 | p.Leu113Ala | 1.10  | 0.14  | Neutral       | 1.64 | 0.71  | Indeterminate | 1.37  | 0.46          | Indeterminate |
| 113 | p.Leu113Gly | 1.15  | 0.20  | Neutral       | 1.35 | 0.43  | Indeterminate | 1.25  | 0.32          | Indeterminate |
| 113 | p.Leu113Val | 0.97  | -0.04 | Neutral       | 0.84 | -0.25 | Neutral       | 0.90  | -0.15         | Neutral       |
| 113 | p.Leu113Tyr | 1.03  | 0.04  | Neutral       | 0.68 | -0.56 | Neutral       | 0.85  | -0.23         | Neutral       |
| 113 | p.Leu113Cys | 0.98  | -0.03 | Neutral       | 0.93 | -0.10 | Neutral       | 0.96  | -0.06         | Neutral       |
| 113 | p.Leu113Trp | 1.01  | 0.01  | Neutral       | 1.19 | 0.25  | Indeterminate | 1.10  | 0.13          | Neutral       |
| 113 | p.Leu113Phe | 1.23  | 0.30  | Indeterminate | 1.26 | 0.33  | Indeterminate | 1.24  | 0.31          | Indeterminate |
| 114 | p.Pro114Asn | 4.52  | 2.18  | Deleterious   |      |       | 4.52          | 2.18  | Deleterious   |               |
| 114 | p.Pro114Lys | 5.61  | 2.49  | Deleterious   |      |       | 5.61          | 2.49  | Deleterious   |               |
| 114 | p.Pro114Thr | 3.24  | 1.70  | Deleterious   |      |       | 3.24          | 1.70  | Deleterious   |               |
| 114 | p.Pro114Arg | 4.59  | 2.20  | Deleterious   |      |       | 4.59          | 2.20  | Deleterious   |               |
| 114 | p.Pro114Ser | 1.70  | 0.76  | Indeterminate |      |       | 1.70          | 0.76  | Indeterminate |               |
| 114 | p.Pro114Ile | 5.11  | 2.35  | Deleterious   |      |       | 5.11          | 2.35  | Deleterious   |               |
| 114 | p.Pro114Met | 5.18  | 2.37  | Deleterious   |      |       | 5.18          | 2.37  | Deleterious   |               |
| 114 | p.Pro114His | 5.87  | 2.55  | Deleterious   |      |       | 5.87          | 2.55  | Deleterious   |               |
| 114 | p.Pro114Gln | 5.24  | 2.39  | Deleterious   |      |       | 5.24          | 2.39  | Deleterious   |               |
| 114 | p.Pro114Pro | 1.00  | 0.00  | Neutral       |      |       | 1.00          | 0.00  | Neutral       |               |
| 114 | p.Pro114Leu | 5.02  | 2.33  | Deleterious   |      |       | 5.02          | 2.33  | Deleterious   |               |
| 114 | p.Pro114Asp | 5.01  | 2.32  | Deleterious   |      |       | 5.01          | 2.32  | Deleterious   |               |
| 114 | p.Pro114Glu | 4.76  | 2.25  | Deleterious   |      |       | 4.76          | 2.25  | Deleterious   |               |
| 114 | p.Pro114Ala | 1.11  | 0.15  | Neutral       |      |       | 1.11          | 0.15  | Neutral       |               |
| 114 | p.Pro114Gly | 3.25  | 1.70  | Deleterious   |      |       | 3.25          | 1.70  | Deleterious   |               |
| 114 | p.Pro114Val | 3.00  | 1.59  | Deleterious   |      |       | 3.00          | 1.59  | Deleterious   |               |
| 114 | p.Pro114Tyr | 5.53  | 2.47  | Deleterious   |      |       | 5.53          | 2.47  | Deleterious   |               |
| 114 | p.Pro114Cys | 1.60  | 0.68  | Indeterminate |      |       | 1.60          | 0.68  | Indeterminate |               |
| 114 | p.Pro114Trp | 4.96  | 2.31  | Deleterious   |      |       | 4.96          | 2.31  | Deleterious   |               |
| 114 | p.Pro114Phe | 4.35  | 2.12  | Deleterious   |      |       | 4.35          | 2.12  | Deleterious   |               |
| 115 | p.Val115Asn | 1.01  | 0.02  | Neutral       |      |       | 1.01          | 0.02  | Neutral       |               |
| 115 | p.Val115Lys | 1.02  | 0.03  | Neutral       |      |       | 1.02          | 0.03  | Neutral       |               |
| 115 | p.Val115Thr | 0.96  | -0.05 | Neutral       |      |       | 0.96          | -0.05 | Neutral       |               |
| 115 | p.Val115Arg | 1.48  | 0.56  | Indeterminate |      |       | 1.48          | 0.56  | Indeterminate |               |
| 115 | p.Val115Ser | 1.12  | 0.17  | Neutral       |      |       | 1.12          | 0.17  | Neutral       |               |
| 115 | p.Val115Ile | 0.93  | -0.10 | Neutral       |      |       | 0.93          | -0.10 | Neutral       |               |
| 115 | p.Val115Met | 0.98  | -0.03 | Neutral       |      |       | 0.98          | -0.03 | Neutral       |               |
| 115 | p.Val115His | 1.17  | 0.22  | Neutral       |      |       | 1.17          | 0.22  | Neutral       |               |
| 115 | p.Val115Gln | 1.49  | 0.58  | Indeterminate |      |       | 1.49          | 0.58  | Indeterminate |               |
| 115 | p.Val115Pro | 2.46  | 1.30  | Deleterious   |      |       | 2.46          | 1.30  | Deleterious   |               |
| 115 | p.Val115Leu | 1.20  | 0.27  | Indeterminate |      |       | 1.20          | 0.27  | Indeterminate |               |
| 115 | p.Val115Asp | 1.30  | 0.38  | Indeterminate |      |       | 1.30          | 0.38  | Indeterminate |               |
| 115 | p.Val115Glu | 1.20  | 0.27  | Indeterminate |      |       | 1.20          | 0.27  | Indeterminate |               |
| 115 | p.Val115Ala | 1.45  | 0.53  | Indeterminate |      |       | 1.45          | 0.53  | Indeterminate |               |
| 115 | p.Val115Gly | 1.21  | 0.28  | Indeterminate |      |       | 1.21          | 0.28  | Indeterminate |               |
| 115 | p.Val115Val | 1.00  | 0.00  | Neutral       |      |       | 1.00          | 0.00  | Neutral       |               |
| 115 | p.Val115Tyr | 0.96  | -0.06 | Neutral       |      |       | 0.96          | -0.06 | Neutral       |               |
| 115 | p.Val115Cys | 0.94  | -0.09 | Neutral       |      |       | 0.94          | -0.09 | Neutral       |               |
| 115 | p.Val115Trp | 1.07  | 0.10  | Neutral       |      |       | 1.07          | 0.10  | Neutral       |               |
| 115 | p.Val115Phe | 1.11  | 0.15  | Neutral       |      |       | 1.11          | 0.15  | Neutral       |               |
| 116 | p.Asp116Asn | 0.98  | -0.03 | Neutral       |      |       | 0.98          | -0.03 | Neutral       |               |
| 116 | p.Asp116Lys | 0.99  | -0.01 | Neutral       |      |       | 0.99          | -0.01 | Neutral       |               |
| 116 | p.Asp116Thr | 1.18  | 0.24  | Neutral       |      |       | 1.18          | 0.24  | Neutral       |               |
| 116 | p.Asp116Arg | 1.18  | 0.23  | Neutral       |      |       | 1.18          | 0.23  | Neutral       |               |
| 116 | p.Asp116Ser | 1.04  | 0.06  | Neutral       |      |       | 1.04          | 0.06  | Neutral       |               |
| 116 | p.Asp116Ile | 1.19  | 0.25  | Indeterminate |      |       | 1.19          | 0.25  | Indeterminate |               |
| 116 | p.Asp116Met | 0.82  | -0.29 | Neutral       |      |       | 0.82          | -0.29 | Neutral       |               |
| 116 | p.Asp116His | 1.05  | 0.07  | Neutral       |      |       | 1.05          | 0.07  | Neutral       |               |
| 116 | p.Asp116Gln | 1.04  | 0.06  | Neutral       |      |       | 1.04          | 0.06  | Neutral       |               |
| 116 | p.Asp116Pro | 4.74  | 2.25  | Deleterious   |      |       | 4.74          | 2.25  | Deleterious   |               |
| 116 | p.Asp116Leu | 1.09  | 0.13  | Neutral       |      |       | 1.09          | 0.13  | Neutral       |               |
| 116 | p.Asp116Asp | 1.00  | 0.00  | Neutral       |      |       | 1.00          | 0.00  | Neutral       |               |
| 116 | p.Asp116Glu | 1.10  | 0.14  | Neutral       |      |       | 1.10          | 0.14  | Neutral       |               |
| 116 | p.Asp116Ala | 1.01  | 0.01  | Neutral       |      |       | 1.01          | 0.01  | Neutral       |               |
| 116 | p.Asp116Gly | 1.47  | 0.56  | Indeterminate |      |       | 1.47          | 0.56  | Indeterminate |               |
| 116 | p.Asp116Val | 1.12  | 0.17  | Neutral       |      |       | 1.12          | 0.17  | Neutral       |               |
| 116 | p.Asp116Tyr | 0.91  | -0.14 | Neutral       |      |       | 0.91          | -0.14 | Neutral       |               |
| 116 | p.Asp116Cys | 1.07  | 0.10  | Neutral       |      |       | 1.07          | 0.10  | Neutral       |               |
| 116 | p.Asp116Trp | 1.36  | 0.45  | Indeterminate |      |       | 1.36          | 0.45  | Indeterminate |               |
| 116 | p.Asp116Phe | 1.17  | 0.23  | Neutral       |      |       | 1.17          | 0.23  | Neutral       |               |
| 117 | p.Leu117Asn | 1.03  | 0.04  | Neutral       |      |       | 1.03          | 0.04  | Neutral       |               |
| 117 | p.Leu117Lys | 1.05  | 0.07  | Neutral       |      |       | 1.05          | 0.07  | Neutral       |               |
| 117 | p.Leu117Thr | 0.96  | -0.07 | Neutral       |      |       | 0.96          | -0.07 | Neutral       |               |
| 117 | p.Leu117Arg | 1.09  | 0.13  | Neutral       |      |       | 1.09          | 0.13  | Neutral       |               |
| 117 | p.Leu117Ser | 1.06  | 0.08  | Neutral       |      |       | 1.06          | 0.08  | Neutral       |               |
| 117 | p.Leu117Ile | 1.00  | 0.01  | Neutral       |      |       | 1.00          | 0.01  | Neutral       |               |
| 117 | p.Leu117Met | 1.02  | 0.03  | Neutral       |      |       | 1.02          | 0.03  | Neutral       |               |

|     |             |      |       |               |      |       |               |       |               |               |
|-----|-------------|------|-------|---------------|------|-------|---------------|-------|---------------|---------------|
| 117 | p.Leu117His | 0.84 | -0.25 | Neutral       |      |       | 0.84          | -0.25 | Neutral       |               |
| 117 | p.Leu117Gln | 1.18 | 0.24  | Indeterminate |      |       | 1.18          | 0.24  | Indeterminate |               |
| 117 | p.Leu117Pro | 2.26 | 1.18  | Deleterious   |      |       | 2.26          | 1.18  | Deleterious   |               |
| 117 | p.Leu117Leu | 1.00 | 0.00  | Neutral       |      |       | 1.00          | 0.00  | Neutral       |               |
| 117 | p.Leu117Asp | 0.97 | -0.04 | Neutral       |      |       | 0.97          | -0.04 | Neutral       |               |
| 117 | p.Leu117Glu | 1.10 | 0.14  | Neutral       |      |       | 1.10          | 0.14  | Neutral       |               |
| 117 | p.Leu117Ala | 0.95 | -0.08 | Neutral       |      |       | 0.95          | -0.08 | Neutral       |               |
| 117 | p.Leu117Gly | 1.07 | 0.10  | Neutral       |      |       | 1.07          | 0.10  | Neutral       |               |
| 117 | p.Leu117Val | 1.03 | 0.05  | Neutral       |      |       | 1.03          | 0.05  | Neutral       |               |
| 117 | p.Leu117Tyr | 0.94 | -0.09 | Neutral       |      |       | 0.94          | -0.09 | Neutral       |               |
| 117 | p.Leu117Cys | 1.10 | 0.14  | Neutral       |      |       | 1.10          | 0.14  | Neutral       |               |
| 117 | p.Leu117Trp | 0.96 | -0.06 | Neutral       |      |       | 0.96          | -0.06 | Neutral       |               |
| 117 | p.Leu117Phe | 1.05 | 0.07  | Neutral       |      |       | 1.05          | 0.07  | Neutral       |               |
| 118 | p.Alal18Asn | 2.04 | 1.03  | Indeterminate |      |       | 2.04          | 1.03  | Indeterminate |               |
| 118 | p.Alal18Lys | 2.34 | 1.23  | Deleterious   |      |       | 2.34          | 1.23  | Deleterious   |               |
| 118 | p.Alal18Thr | 1.28 | 0.36  | Indeterminate |      |       | 1.28          | 0.36  | Indeterminate |               |
| 118 | p.Alal18Arg | 2.23 | 1.15  | Deleterious   |      |       | 2.23          | 1.15  | Deleterious   |               |
| 118 | p.Alal18Ser | 1.18 | 0.24  | Indeterminate |      |       | 1.18          | 0.24  | Indeterminate |               |
| 118 | p.Alal18Ile | 1.60 | 0.67  | Indeterminate |      |       | 1.60          | 0.67  | Indeterminate |               |
| 118 | p.Alal18Met | 1.74 | 0.80  | Indeterminate |      |       | 1.74          | 0.80  | Indeterminate |               |
| 118 | p.Alal18His | 2.19 | 1.13  | Deleterious   |      |       | 2.19          | 1.13  | Deleterious   |               |
| 118 | p.Alal18Gln | 2.01 | 1.01  | Indeterminate |      |       | 2.01          | 1.01  | Indeterminate |               |
| 118 | p.Alal18Pro | 1.63 | 0.71  | Indeterminate |      |       | 1.63          | 0.71  | Indeterminate |               |
| 118 | p.Alal18Leu | 1.46 | 0.55  | Indeterminate |      |       | 1.46          | 0.55  | Indeterminate |               |
| 118 | p.Alal18Asp | 2.15 | 1.10  | Deleterious   |      |       | 2.15          | 1.10  | Deleterious   |               |
| 118 | p.Alal18Glu | 2.11 | 1.08  | Indeterminate |      |       | 2.11          | 1.08  | Indeterminate |               |
| 118 | p.Alal18Ala | 1.00 | 0.00  | Neutral       |      |       | 1.00          | 0.00  | Neutral       |               |
| 118 | p.Alal18Gly | 0.98 | -0.02 | Neutral       |      |       | 0.98          | -0.02 | Neutral       |               |
| 118 | p.Alal18Val | 1.29 | 0.37  | Indeterminate |      |       | 1.29          | 0.37  | Indeterminate |               |
| 118 | p.Alal18Tyr | 2.02 | 1.02  | Indeterminate |      |       | 2.02          | 1.02  | Indeterminate |               |
| 118 | p.Alal18Cys | 1.11 | 0.15  | Neutral       |      |       | 1.11          | 0.15  | Neutral       |               |
| 118 | p.Alal18Trp | 2.40 | 1.26  | Deleterious   |      |       | 2.40          | 1.26  | Deleterious   |               |
| 118 | p.Alal18Phe | 2.05 | 1.04  | Indeterminate |      |       | 2.05          | 1.04  | Indeterminate |               |
| 119 | p.Glu119Asn | 0.89 | -0.17 | Neutral       |      |       | 0.89          | -0.17 | Neutral       |               |
| 119 | p.Glu119Lys | 0.74 | -0.44 | Neutral       |      |       | 0.74          | -0.44 | Neutral       |               |
| 119 | p.Glu119Thr | 0.71 | -0.48 | Neutral       |      |       | 0.71          | -0.48 | Neutral       |               |
| 119 | p.Glu119Arg | 1.28 | 0.36  | Indeterminate |      |       | 1.28          | 0.36  | Indeterminate |               |
| 119 | p.Glu119Ser | 0.40 | -1.31 | Neutral       |      |       | 0.40          | -1.31 | Neutral       |               |
| 119 | p.Glu119Ile | 0.63 | -0.67 | Neutral       |      |       | 0.63          | -0.67 | Neutral       |               |
| 119 | p.Glu119Met | 1.29 | 0.37  | Indeterminate |      |       | 1.29          | 0.37  | Indeterminate |               |
| 119 | p.Glu119His | 2.07 | 1.05  | Indeterminate |      |       | 2.07          | 1.05  | Indeterminate |               |
| 119 | p.Glu119Gln | 1.79 | 0.84  | Indeterminate |      |       | 1.79          | 0.84  | Indeterminate |               |
| 119 | p.Glu119Pro | 2.25 | 1.17  | Deleterious   |      |       | 2.25          | 1.17  | Deleterious   |               |
| 119 | p.Glu119Leu | 0.83 | -0.27 | Neutral       |      |       | 0.83          | -0.27 | Neutral       |               |
| 119 | p.Glu119Asp | 1.38 | 0.46  | Indeterminate |      |       | 1.38          | 0.46  | Indeterminate |               |
| 119 | p.Glu119Glu | 1.00 | 0.00  | Neutral       |      |       | 1.00          | 0.00  | Neutral       |               |
| 119 | p.Glu119Ala | 0.53 | -0.90 | Neutral       |      |       | 0.53          | -0.90 | Neutral       |               |
| 119 | p.Glu119Gly | 0.89 | -0.16 | Neutral       |      |       | 0.89          | -0.16 | Neutral       |               |
| 119 | p.Glu119Val | 1.27 | 0.35  | Indeterminate |      |       | 1.27          | 0.35  | Indeterminate |               |
| 119 | p.Glu119Tyr | 0.42 | -1.26 | Neutral       |      |       | 0.42          | -1.26 | Neutral       |               |
| 119 | p.Glu119Cys | 0.49 | -1.04 | Neutral       |      |       | 0.49          | -1.04 | Neutral       |               |
| 119 | p.Glu119Trp | 2.09 | 1.06  | Indeterminate |      |       | 2.09          | 1.06  | Indeterminate |               |
| 119 | p.Glu119Phe | 2.16 | 1.11  | Deleterious   |      |       | 2.16          | 1.11  | Deleterious   |               |
| 120 | p.Glu120Asn | 1.20 | 0.26  | Indeterminate | 1.02 | 0.03  | Neutral       | 1.11  | 0.15          | Neutral       |
| 120 | p.Glu120Lys | 1.07 | 0.09  | Neutral       | 1.01 | 0.02  | Neutral       | 1.04  | 0.06          | Neutral       |
| 120 | p.Glu120Thr | 1.11 | 0.15  | Neutral       | 0.76 | -0.40 | Neutral       | 0.93  | -0.10         | Neutral       |
| 120 | p.Glu120Arg | 1.11 | 0.15  | Neutral       | 1.01 | 0.01  | Neutral       | 1.06  | 0.08          | Neutral       |
| 120 | p.Glu120Ser | 1.05 | 0.07  | Neutral       | 0.81 | -0.30 | Neutral       | 0.93  | -0.10         | Neutral       |
| 120 | p.Glu120Ile | 1.36 | 0.44  | Indeterminate | 0.91 | -0.14 | Neutral       | 1.13  | 0.18          | Neutral       |
| 120 | p.Glu120Met | 1.43 | 0.52  | Indeterminate | 1.02 | 0.03  | Neutral       | 1.23  | 0.29          | Indeterminate |
| 120 | p.Glu120His | 1.10 | 0.14  | Neutral       | 1.06 | 0.08  | Neutral       | 1.08  | 0.11          | Neutral       |
| 120 | p.Glu120Gln | 1.24 | 0.31  | Indeterminate | 1.00 | 0.00  | Neutral       | 1.12  | 0.17          | Neutral       |
| 120 | p.Glu120Pro | 1.20 | 0.27  | Indeterminate | 0.87 | -0.20 | Neutral       | 1.04  | 0.05          | Neutral       |
| 120 | p.Glu120Leu | 0.92 | -0.11 | Neutral       | 0.95 | -0.08 | Neutral       | 0.94  | -0.10         | Neutral       |
| 120 | p.Glu120Asp | 1.13 | 0.17  | Neutral       | 1.05 | 0.07  | Neutral       | 1.09  | 0.12          | Neutral       |
| 120 | p.Glu120Glu | 1.00 | 0.00  | Neutral       | 1.00 | 0.00  | Neutral       | 1.00  | 0.00          | Neutral       |
| 120 | p.Glu120Ala | 1.03 | 0.04  | Neutral       | 0.65 | -0.62 | Neutral       | 0.84  | -0.25         | Neutral       |
| 120 | p.Glu120Gly | 1.08 | 0.11  | Neutral       | 0.76 | -0.40 | Neutral       | 0.92  | -0.13         | Neutral       |
| 120 | p.Glu120Val | 1.11 | 0.16  | Neutral       | 0.96 | -0.06 | Neutral       | 1.04  | 0.05          | Neutral       |
| 120 | p.Glu120Tyr | 1.05 | 0.07  | Neutral       | 1.08 | 0.11  | Neutral       | 1.06  | 0.09          | Neutral       |
| 120 | p.Glu120Cys | 1.16 | 0.21  | Neutral       | 0.99 | -0.02 | Neutral       | 1.07  | 0.10          | Neutral       |
| 120 | p.Glu120Trp | 1.24 | 0.31  | Indeterminate | 0.86 | -0.23 | Neutral       | 1.05  | 0.07          | Neutral       |
| 120 | p.Glu120Phe | 1.03 | 0.04  | Neutral       | 0.85 | -0.24 | Neutral       | 0.94  | -0.10         | Neutral       |
| 121 | p.Leu121Asn | 1.30 | 0.38  | Indeterminate |      |       | 1.30          | 0.38  | Indeterminate |               |
| 121 | p.Leu121Lys | 1.12 | 0.16  | Neutral       |      |       | 1.12          | 0.16  | Neutral       |               |
| 121 | p.Leu121Thr | 1.18 | 0.24  | Indeterminate |      |       | 1.18          | 0.24  | Indeterminate |               |
| 121 | p.Leu121Arg | 1.76 | 0.81  | Indeterminate |      |       | 1.76          | 0.81  | Indeterminate |               |
| 121 | p.Leu121Ser | 1.14 | 0.19  | Neutral       |      |       | 1.14          | 0.19  | Neutral       |               |
| 121 | p.Leu121Ile | 1.13 | 0.18  | Neutral       |      |       | 1.13          | 0.18  | Neutral       |               |
| 121 | p.Leu121Met | 4.46 | 2.16  | Deleterious   |      |       | 4.46          | 2.16  | Deleterious   |               |
| 121 | p.Leu121His | 0.92 | -0.12 | Neutral       |      |       | 0.92          | -0.12 | Neutral       |               |
| 121 | p.Leu121Gln | 1.09 | 0.12  | Neutral       |      |       | 1.09          | 0.12  | Neutral       |               |
| 121 | p.Leu121Pro | 0.96 | -0.05 | Neutral       |      |       | 0.96          | -0.05 | Neutral       |               |
| 121 | p.Leu121Leu | 1.00 | 0.00  | Neutral       |      |       | 1.00          | 0.00  | Neutral       |               |
| 121 | p.Leu121Asp | 0.65 | -0.62 | Neutral       |      |       | 0.65          | -0.62 | Neutral       |               |
| 121 | p.Leu121Glu | 1.42 | 0.50  | Indeterminate |      |       | 1.42          | 0.50  | Indeterminate |               |
| 121 | p.Leu121Ala | 1.14 | 0.19  | Neutral       |      |       | 1.14          | 0.19  | Neutral       |               |
| 121 | p.Leu121Gly | 1.36 | 0.45  | Indeterminate |      |       | 1.36          | 0.45  | Indeterminate |               |
| 121 | p.Leu121Val | 0.84 | -0.25 | Neutral       |      |       | 0.84          | -0.25 | Neutral       |               |
| 121 | p.Leu121Tyr | 0.74 | -0.43 | Neutral       |      |       | 0.74          | -0.43 | Neutral       |               |
| 121 | p.Leu121Cys | 0.91 | -0.13 | Neutral       |      |       | 0.91          | -0.13 | Neutral       |               |
| 121 | p.Leu121Trp | 1.32 | 0.40  | Indeterminate |      |       | 1.32          | 0.40  | Indeterminate |               |
| 121 | p.Leu121Phe | 0.99 | -0.02 | Neutral       |      |       | 0.99          | -0.02 | Neutral       |               |
| 122 | p.Gly122Asn | 0.93 | -0.11 | Neutral       | 0.50 | -0.99 | Neutral       | 0.71  | -0.48         | Neutral       |
| 122 | p.Gly122Lys | 1.13 | 0.18  | Neutral       | 0.59 | -0.76 | Neutral       | 0.86  | -0.21         | Neutral       |
| 122 | p.Gly122Thr | 1.04 | 0.06  | Neutral       | 0.78 | -0.35 | Neutral       | 0.91  | -0.13         | Neutral       |
| 122 | p.Gly122Arg | 1.30 | 0.38  | Indeterminate | 1.17 | 0.23  | Neutral       | 1.24  | 0.31          | Indeterminate |
| 122 | p.Gly122Ser | 0.94 | -0.10 | Neutral       | 0.78 | -0.36 | Neutral       | 0.86  | -0.22         | Neutral       |
| 122 | p.Gly122Ile | 1.30 | 0.37  | Indeterminate | 0.68 | -0.56 | Neutral       | 0.99  | -0.02         | Neutral       |
| 122 | p.Gly122Met | 0.97 | -0.05 | Neutral       | 0.99 | -0.02 | Neutral       | 0.98  | -0.03         | Neutral       |
| 122 | p.Gly122His | 0.95 | -0.08 | Neutral       | 0.88 | -0.19 | Neutral       | 0.91  | -0.13         | Neutral       |
| 122 | p.Gly122Gln | 1.03 | 0.04  | Neutral       | 0.63 | -0.67 | Neutral       | 0.83  | -0.27         | Neutral       |
| 122 | p.Gly122Pro | 0.99 | -0.01 | Neutral       | 1.24 | 0.31  | Indeterminate | 1.12  | 0.16          | Neutral       |
| 122 | p.Gly122Leu | 1.10 | 0.14  | Neutral       | 0.65 | -0.61 | Neutral       | 0.88  | -0.19         | Neutral       |
| 122 | p.Gly122Asp | 1.08 | 0.12  | Neutral       | 0.63 | -0.67 | Neutral       | 0.86  | -0.23         | Neutral       |
| 122 | p.Gly122Glu | 1.17 | 0.23  | Neutral       | 0.65 | -0.61 | Neutral       | 0.91  | -0.13         | Neutral       |





|     |             |      |       |               |      |       |               |
|-----|-------------|------|-------|---------------|------|-------|---------------|
| 127 | p.Alal27Phe | 1.36 | 0.44  | Indeterminate | 1.36 | 0.44  | Indeterminate |
| 128 | p.Arg128Asn | 0.38 | -1.40 | Neutral       | 0.38 | -1.40 | Neutral       |
| 128 | p.Arg128Lys | 0.98 | -0.03 | Neutral       | 0.98 | -0.03 | Neutral       |
| 128 | p.Arg128Thr | 0.73 | -0.46 | Neutral       | 0.73 | -0.46 | Neutral       |
| 128 | p.Arg128Arg | 1.00 | 0.00  | Neutral       | 1.00 | 0.00  | Neutral       |
| 128 | p.Arg128Ser | 1.43 | 0.51  | Indeterminate | 1.43 | 0.51  | Indeterminate |
| 128 | p.Arg128Ile | 1.28 | 0.35  | Indeterminate | 1.28 | 0.35  | Indeterminate |
| 128 | p.Arg128Met | 0.83 | -0.26 | Neutral       | 0.83 | -0.26 | Neutral       |
| 128 | p.Arg128His | 0.86 | -0.22 | Neutral       | 0.86 | -0.22 | Neutral       |
| 128 | p.Arg128Gln | 0.60 | -0.74 | Neutral       | 0.60 | -0.74 | Neutral       |
| 128 | p.Arg128Pro | 2.66 | 1.41  | Deleterious   | 2.66 | 1.41  | Deleterious   |
| 128 | p.Arg128Leu | 0.74 | -0.43 | Neutral       | 0.74 | -0.43 | Neutral       |
| 128 | p.Arg128Asp | 0.65 | -0.61 | Neutral       | 0.65 | -0.61 | Neutral       |
| 128 | p.Arg128Glu | 0.88 | -0.18 | Neutral       | 0.88 | -0.18 | Neutral       |
| 128 | p.Arg128Ala | 0.74 | -0.44 | Neutral       | 0.74 | -0.44 | Neutral       |
| 128 | p.Arg128Gly | 1.19 | 0.26  | Indeterminate | 1.19 | 0.26  | Indeterminate |
| 128 | p.Arg128Val | 0.65 | -0.63 | Neutral       | 0.65 | -0.63 | Neutral       |
| 128 | p.Arg128Tyr | 0.78 | -0.35 | Neutral       | 0.78 | -0.35 | Neutral       |
| 128 | p.Arg128Cys | 0.51 | -0.97 | Neutral       | 0.51 | -0.97 | Neutral       |
| 128 | p.Arg128Trp | 0.67 | -0.58 | Neutral       | 0.67 | -0.58 | Neutral       |
| 128 | p.Arg128Phe | 1.20 | 0.26  | Indeterminate | 1.20 | 0.26  | Indeterminate |
| 129 | p.Tyr129Asn | 2.40 | 1.26  | Deleterious   | 2.40 | 1.26  | Deleterious   |
| 129 | p.Tyr129Lys | 1.31 | 0.39  | Indeterminate | 1.31 | 0.39  | Indeterminate |
| 129 | p.Tyr129Thr | 1.99 | 0.99  | Indeterminate | 1.99 | 0.99  | Indeterminate |
| 129 | p.Tyr129Arg | 1.07 | 0.10  | Neutral       | 1.07 | 0.10  | Neutral       |
| 129 | p.Tyr129Ser | 1.08 | 0.11  | Neutral       | 1.08 | 0.11  | Neutral       |
| 129 | p.Tyr129Ile | 1.40 | 0.49  | Indeterminate | 1.40 | 0.49  | Indeterminate |
| 129 | p.Tyr129Met | 0.98 | -0.03 | Neutral       | 0.98 | -0.03 | Neutral       |
| 129 | p.Tyr129His | 1.07 | 0.10  | Neutral       | 1.07 | 0.10  | Neutral       |
| 129 | p.Tyr129Gln | 1.09 | 0.12  | Neutral       | 1.09 | 0.12  | Neutral       |
| 129 | p.Tyr129Pro | 8.53 | 3.09  | Deleterious   | 8.53 | 3.09  | Deleterious   |
| 129 | p.Tyr129Leu | 0.89 | -0.17 | Neutral       | 0.89 | -0.17 | Neutral       |
| 129 | p.Tyr129Asp | 2.12 | 1.09  | Indeterminate | 2.12 | 1.09  | Indeterminate |
| 129 | p.Tyr129Glu | 1.00 | 0.01  | Neutral       | 1.00 | 0.01  | Neutral       |
| 129 | p.Tyr129Ala | 1.12 | 0.16  | Neutral       | 1.12 | 0.16  | Neutral       |
| 129 | p.Tyr129Gly | 1.39 | 0.47  | Indeterminate | 1.39 | 0.47  | Indeterminate |
| 129 | p.Tyr129Val | 1.17 | 0.23  | Neutral       | 1.17 | 0.23  | Neutral       |
| 129 | p.Tyr129Tyr | 1.00 | 0.00  | Neutral       | 1.00 | 0.00  | Neutral       |
| 129 | p.Tyr129Cys | 1.07 | 0.10  | Neutral       | 1.07 | 0.10  | Neutral       |
| 129 | p.Tyr129Trp | 0.89 | -0.16 | Neutral       | 0.89 | -0.16 | Neutral       |
| 129 | p.Tyr129Phe | 1.17 | 0.23  | Neutral       | 1.17 | 0.23  | Neutral       |
| 130 | p.Leu130Asn | 1.95 | 0.96  | Indeterminate | 1.95 | 0.96  | Indeterminate |
| 130 | p.Leu130Lys | 3.66 | 1.87  | Deleterious   | 3.66 | 1.87  | Deleterious   |
| 130 | p.Leu130Thr | 1.07 | 0.10  | Neutral       | 1.07 | 0.10  | Neutral       |
| 130 | p.Leu130Arg | 3.66 | 1.87  | Deleterious   | 3.66 | 1.87  | Deleterious   |
| 130 | p.Leu130Ser | 1.22 | 0.29  | Indeterminate | 1.22 | 0.29  | Indeterminate |
| 130 | p.Leu130Ile | 0.91 | -0.13 | Neutral       | 0.91 | -0.13 | Neutral       |
| 130 | p.Leu130Met | 0.93 | -0.11 | Neutral       | 0.93 | -0.11 | Neutral       |
| 130 | p.Leu130His | 1.79 | 0.84  | Indeterminate | 1.79 | 0.84  | Indeterminate |
| 130 | p.Leu130Gln | 1.73 | 0.79  | Indeterminate | 1.73 | 0.79  | Indeterminate |
| 130 | p.Leu130Pro | 3.71 | 1.89  | Deleterious   | 3.71 | 1.89  | Deleterious   |
| 130 | p.Leu130Leu | 1.00 | 0.00  | Neutral       | 1.00 | 0.00  | Neutral       |
| 130 | p.Leu130Asp | 2.94 | 1.56  | Deleterious   | 2.94 | 1.56  | Deleterious   |
| 130 | p.Leu130Glu | 2.74 | 1.46  | Deleterious   | 2.74 | 1.46  | Deleterious   |
| 130 | p.Leu130Ala | 1.05 | 0.07  | Neutral       | 1.05 | 0.07  | Neutral       |
| 130 | p.Leu130Gly | 1.08 | 0.12  | Neutral       | 1.08 | 0.12  | Neutral       |
| 130 | p.Leu130Val | 0.87 | -0.20 | Neutral       | 0.87 | -0.20 | Neutral       |
| 130 | p.Leu130Tyr | 1.08 | 0.12  | Neutral       | 1.08 | 0.12  | Neutral       |
| 130 | p.Leu130Cys | 1.06 | 0.09  | Neutral       | 1.06 | 0.09  | Neutral       |
| 130 | p.Leu130Trp | 1.20 | 0.26  | Indeterminate | 1.20 | 0.26  | Indeterminate |
| 130 | p.Leu130Phe | 1.00 | 0.00  | Neutral       | 1.00 | 0.00  | Neutral       |
| 131 | p.Arg131Asn | 0.97 | -0.05 | Neutral       | 0.97 | -0.05 | Neutral       |
| 131 | p.Arg131Lys | 0.83 | -0.27 | Neutral       | 0.83 | -0.27 | Neutral       |
| 131 | p.Arg131Thr | 1.74 | 0.80  | Indeterminate | 1.74 | 0.80  | Indeterminate |
| 131 | p.Arg131Arg | 1.00 | 0.00  | Neutral       | 1.00 | 0.00  | Neutral       |
| 131 | p.Arg131Ser | 1.12 | 0.16  | Neutral       | 1.12 | 0.16  | Neutral       |
| 131 | p.Arg131Ile | 0.86 | -0.21 | Neutral       | 0.86 | -0.21 | Neutral       |
| 131 | p.Arg131Met | 0.99 | -0.01 | Neutral       | 0.99 | -0.01 | Neutral       |
| 131 | p.Arg131His | 1.13 | 0.18  | Neutral       | 1.13 | 0.18  | Neutral       |
| 131 | p.Arg131Gln | 2.44 | 1.28  | Deleterious   | 2.44 | 1.28  | Deleterious   |
| 131 | p.Arg131Pro | 2.12 | 1.08  | Indeterminate | 2.12 | 1.08  | Indeterminate |
| 131 | p.Arg131Leu | 0.76 | -0.40 | Neutral       | 0.76 | -0.40 | Neutral       |
| 131 | p.Arg131Asp | 0.78 | -0.37 | Neutral       | 0.78 | -0.37 | Neutral       |
| 131 | p.Arg131Glu | 0.87 | -0.20 | Neutral       | 0.87 | -0.20 | Neutral       |
| 131 | p.Arg131Ala | 1.15 | 0.21  | Neutral       | 1.15 | 0.21  | Neutral       |
| 131 | p.Arg131Gly | 1.02 | 0.02  | Neutral       | 1.02 | 0.02  | Neutral       |
| 131 | p.Arg131Val | 0.90 | -0.16 | Neutral       | 0.90 | -0.16 | Neutral       |
| 131 | p.Arg131Tyr | 0.94 | -0.10 | Neutral       | 0.94 | -0.10 | Neutral       |
| 131 | p.Arg131Cys | 3.75 | 1.91  | Deleterious   | 3.75 | 1.91  | Deleterious   |
| 131 | p.Arg131Trp | 1.21 | 0.28  | Indeterminate | 1.21 | 0.28  | Indeterminate |
| 131 | p.Arg131Phe | 0.69 | -0.53 | Neutral       | 0.69 | -0.53 | Neutral       |
| 132 | p.Alal32Asn | 2.18 | 1.12  | Deleterious   | 2.18 | 1.12  | Deleterious   |
| 132 | p.Alal32Lys | 1.27 | 0.35  | Indeterminate | 1.27 | 0.35  | Indeterminate |
| 132 | p.Alal32Thr | 1.19 | 0.25  | Indeterminate | 1.19 | 0.25  | Indeterminate |
| 132 | p.Alal32Arg | 1.18 | 0.24  | Neutral       | 1.18 | 0.24  | Neutral       |
| 132 | p.Alal32Ser | 2.27 | 1.18  | Deleterious   | 2.27 | 1.18  | Deleterious   |
| 132 | p.Alal32Ile | 1.48 | 0.56  | Indeterminate | 1.48 | 0.56  | Indeterminate |
| 132 | p.Alal32Met | 1.34 | 0.42  | Indeterminate | 1.34 | 0.42  | Indeterminate |
| 132 | p.Alal32His | 1.66 | 0.73  | Indeterminate | 1.66 | 0.73  | Indeterminate |
| 132 | p.Alal32Gln | 1.21 | 0.27  | Indeterminate | 1.21 | 0.27  | Indeterminate |
| 132 | p.Alal32Pro | 1.19 | 0.25  | Indeterminate | 1.19 | 0.25  | Indeterminate |
| 132 | p.Alal32Leu | 1.52 | 0.60  | Indeterminate | 1.52 | 0.60  | Indeterminate |
| 132 | p.Alal32Asp | 1.96 | 0.97  | Indeterminate | 1.96 | 0.97  | Indeterminate |
| 132 | p.Alal32Glu | 1.51 | 0.60  | Indeterminate | 1.51 | 0.60  | Indeterminate |
| 132 | p.Alal32Ala | 1.00 | 0.00  | Neutral       | 1.00 | 0.00  | Neutral       |
| 132 | p.Alal32Gly | 5.74 | 2.52  | Deleterious   | 5.74 | 2.52  | Deleterious   |
| 132 | p.Alal32Val | 1.35 | 0.44  | Indeterminate | 1.35 | 0.44  | Indeterminate |
| 132 | p.Alal32Tyr | 1.42 | 0.51  | Indeterminate | 1.42 | 0.51  | Indeterminate |
| 132 | p.Alal32Cys | 1.93 | 0.95  | Indeterminate | 1.93 | 0.95  | Indeterminate |
| 132 | p.Alal32Trp | 1.27 | 0.34  | Indeterminate | 1.27 | 0.34  | Indeterminate |
| 132 | p.Alal32Phe | 1.19 | 0.25  | Indeterminate | 1.19 | 0.25  | Indeterminate |
| 133 | p.Alal33Asn | 0.69 | -0.53 | Neutral       | 0.69 | -0.53 | Neutral       |
| 133 | p.Alal33Lys | 0.77 | -0.38 | Neutral       | 0.77 | -0.38 | Neutral       |
| 133 | p.Alal33Thr | 0.79 | -0.34 | Neutral       | 0.79 | -0.34 | Neutral       |
| 133 | p.Alal33Arg | 1.09 | 0.13  | Neutral       | 1.09 | 0.13  | Neutral       |
| 133 | p.Alal33Ser | 0.90 | -0.15 | Neutral       | 0.90 | -0.15 | Neutral       |



|     |             |      |       |               |      |       |               |       |         |               |
|-----|-------------|------|-------|---------------|------|-------|---------------|-------|---------|---------------|
| 138 | p.Arg138Asp | 0.97 | -0.05 | Neutral       |      |       | 0.97          | -0.05 | Neutral |               |
| 138 | p.Arg138Glu | 0.94 | -0.08 | Neutral       |      |       | 0.94          | -0.08 | Neutral |               |
| 138 | p.Arg138Ala | 0.58 | -0.80 | Neutral       |      |       | 0.58          | -0.80 | Neutral |               |
| 138 | p.Arg138Gly | 0.96 | -0.06 | Neutral       |      |       | 0.96          | -0.06 | Neutral |               |
| 138 | p.Arg138Val | 0.90 | -0.15 | Neutral       |      |       | 0.90          | -0.15 | Neutral |               |
| 138 | p.Arg138Tyr | 0.72 | -0.47 | Neutral       |      |       | 0.72          | -0.47 | Neutral |               |
| 138 | p.Arg138Cys | 0.86 | -0.22 | Neutral       |      |       | 0.86          | -0.22 | Neutral |               |
| 138 | p.Arg138Trp | 0.81 | -0.31 | Neutral       |      |       | 0.81          | -0.31 | Neutral |               |
| 138 | p.Arg138Phe | 0.89 | -0.18 | Neutral       |      |       | 0.89          | -0.18 | Neutral |               |
| 139 | p.Gly139Asn | 0.98 | -0.04 | Neutral       | 1.01 | 0.02  | Neutral       | 1.00  | -0.01   | Neutral       |
| 139 | p.Gly139Lys | 1.05 | 0.08  | Neutral       | 1.28 | 0.36  | Indeterminate | 1.17  | 0.23    | Neutral       |
| 139 | p.Gly139Thr | 0.88 | -0.19 | Neutral       | 1.27 | 0.35  | Indeterminate | 1.07  | 0.10    | Neutral       |
| 139 | p.Gly139Arg | 0.87 | -0.20 | Neutral       | 1.15 | 0.20  | Neutral       | 1.01  | 0.01    | Neutral       |
| 139 | p.Gly139Ser | 1.20 | 0.27  | Indeterminate | 1.26 | 0.33  | Indeterminate | 1.23  | 0.30    | Indeterminate |
| 139 | p.Gly139Ile | 0.99 | -0.02 | Neutral       | 1.18 | 0.23  | Neutral       | 1.08  | 0.11    | Neutral       |
| 139 | p.Gly139Met | 1.14 | 0.19  | Neutral       | 1.24 | 0.31  | Indeterminate | 1.19  | 0.25    | Indeterminate |
| 139 | p.Gly139His | 0.88 | -0.18 | Neutral       | 1.12 | 0.16  | Neutral       | 1.00  | 0.00    | Neutral       |
| 139 | p.Gly139Gln | 0.93 | -0.11 | Neutral       | 1.02 | 0.03  | Neutral       | 0.98  | -0.04   | Neutral       |
| 139 | p.Gly139Pro | 1.30 | 0.38  | Indeterminate | 0.92 | -0.12 | Neutral       | 1.11  | 0.15    | Neutral       |
| 139 | p.Gly139Leu | 0.85 | -0.24 | Neutral       | 1.34 | 0.42  | Indeterminate | 1.09  | 0.13    | Neutral       |
| 139 | p.Gly139Asp | 0.89 | -0.16 | Neutral       | 1.37 | 0.46  | Indeterminate | 1.13  | 0.18    | Neutral       |
| 139 | p.Gly139Glu | 1.12 | 0.16  | Neutral       | 1.24 | 0.31  | Indeterminate | 1.18  | 0.24    | Neutral       |
| 139 | p.Gly139Ala | 0.80 | -0.32 | Neutral       | 1.38 | 0.46  | Indeterminate | 1.09  | 0.12    | Neutral       |
| 139 | p.Gly139Gly | 1.00 | 0.00  | Neutral       | 1.00 | 0.00  | Neutral       | 1.00  | 0.00    | Neutral       |
| 139 | p.Gly139Val | 0.89 | -0.17 | Neutral       | 1.04 | 0.05  | Neutral       | 0.96  | -0.06   | Neutral       |
| 139 | p.Gly139Tyr | 1.38 | 0.46  | Indeterminate | 1.35 | 0.43  | Indeterminate | 1.36  | 0.45    | Indeterminate |
| 139 | p.Gly139Cys | 0.86 | -0.23 | Neutral       | 1.03 | 0.04  | Neutral       | 0.94  | -0.09   | Neutral       |
| 139 | p.Gly139Trp | 0.91 | -0.14 | Neutral       | 1.18 | 0.23  | Neutral       | 1.04  | 0.06    | Neutral       |
| 139 | p.Gly139Phe | 1.15 | 0.20  | Neutral       | 1.30 | 0.37  | Indeterminate | 1.22  | 0.29    | Indeterminate |
| 140 | p.Ser140Asn | 1.02 | 0.03  | Neutral       |      |       |               | 1.02  | 0.03    | Neutral       |
| 140 | p.Ser140Lys | 0.95 | -0.08 | Neutral       |      |       |               | 0.95  | -0.08   | Neutral       |
| 140 | p.Ser140Thr | 0.98 | -0.02 | Neutral       |      |       |               | 0.98  | -0.02   | Neutral       |
| 140 | p.Ser140Arg | 1.18 | 0.23  | Neutral       |      |       |               | 1.18  | 0.23    | Neutral       |
| 140 | p.Ser140Ser | 1.00 | 0.00  | Neutral       |      |       |               | 1.00  | 0.00    | Neutral       |
| 140 | p.Ser140Ile | 0.95 | -0.08 | Neutral       |      |       |               | 0.95  | -0.08   | Neutral       |
| 140 | p.Ser140Met | 0.94 | -0.08 | Neutral       |      |       |               | 0.94  | -0.08   | Neutral       |
| 140 | p.Ser140His | 1.04 | 0.06  | Neutral       |      |       |               | 1.04  | 0.06    | Neutral       |
| 140 | p.Ser140Gln | 0.99 | -0.02 | Neutral       |      |       |               | 0.99  | -0.02   | Neutral       |
| 140 | p.Ser140Pro | 1.20 | 0.27  | Indeterminate |      |       |               | 1.20  | 0.27    | Indeterminate |
| 140 | p.Ser140Leu | 0.90 | -0.15 | Neutral       |      |       |               | 0.90  | -0.15   | Neutral       |
| 140 | p.Ser140Asp | 0.98 | -0.03 | Neutral       |      |       |               | 0.98  | -0.03   | Neutral       |
| 140 | p.Ser140Glu | 0.90 | -0.16 | Neutral       |      |       |               | 0.90  | -0.16   | Neutral       |
| 140 | p.Ser140Ala | 1.07 | 0.09  | Neutral       |      |       |               | 1.07  | 0.09    | Neutral       |
| 140 | p.Ser140Gly | 1.28 | 0.36  | Indeterminate |      |       |               | 1.28  | 0.36    | Indeterminate |
| 140 | p.Ser140Val | 0.97 | -0.04 | Neutral       |      |       |               | 0.97  | -0.04   | Neutral       |
| 140 | p.Ser140Tyr | 1.10 | 0.14  | Neutral       |      |       |               | 1.10  | 0.14    | Neutral       |
| 140 | p.Ser140Cys | 1.03 | 0.05  | Neutral       |      |       |               | 1.03  | 0.05    | Neutral       |
| 140 | p.Ser140Trp | 0.98 | -0.03 | Neutral       |      |       |               | 0.98  | -0.03   | Neutral       |
| 140 | p.Ser140Phe | 0.92 | -0.12 | Neutral       |      |       |               | 0.92  | -0.12   | Neutral       |
| 141 | p.Asn141Asn | 1.00 | 0.00  | Neutral       |      |       |               | 1.00  | 0.00    | Neutral       |
| 141 | p.Asn141Lys | 0.78 | -0.36 | Neutral       |      |       |               | 0.78  | -0.36   | Neutral       |
| 141 | p.Asn141Thr | 0.98 | -0.03 | Neutral       |      |       |               | 0.98  | -0.03   | Neutral       |
| 141 | p.Asn141Arg | 0.97 | -0.04 | Neutral       |      |       |               | 0.97  | -0.04   | Neutral       |
| 141 | p.Asn141Ser | 0.84 | -0.25 | Neutral       |      |       |               | 0.84  | -0.25   | Neutral       |
| 141 | p.Asn141Ile | 0.95 | -0.08 | Neutral       |      |       |               | 0.95  | -0.08   | Neutral       |
| 141 | p.Asn141Met | 0.92 | -0.13 | Neutral       |      |       |               | 0.92  | -0.13   | Neutral       |
| 141 | p.Asn141His | 0.86 | -0.21 | Neutral       |      |       |               | 0.86  | -0.21   | Neutral       |
| 141 | p.Asn141Gln | 1.01 | 0.01  | Neutral       |      |       |               | 1.01  | 0.01    | Neutral       |
| 141 | p.Asn141Pro | 0.87 | -0.21 | Neutral       |      |       |               | 0.87  | -0.21   | Neutral       |
| 141 | p.Asn141Leu | 0.86 | -0.22 | Neutral       |      |       |               | 0.86  | -0.22   | Neutral       |
| 141 | p.Asn141Asp | 0.92 | -0.12 | Neutral       |      |       |               | 0.92  | -0.12   | Neutral       |
| 141 | p.Asn141Glu | 0.97 | -0.05 | Neutral       |      |       |               | 0.97  | -0.05   | Neutral       |
| 141 | p.Asn141Ala | 0.90 | -0.14 | Neutral       |      |       |               | 0.90  | -0.14   | Neutral       |
| 141 | p.Asn141Gly | 0.88 | -0.18 | Neutral       |      |       |               | 0.88  | -0.18   | Neutral       |
| 141 | p.Asn141Val | 0.85 | -0.24 | Neutral       |      |       |               | 0.85  | -0.24   | Neutral       |
| 141 | p.Asn141Tyr | 0.87 | -0.20 | Neutral       |      |       |               | 0.87  | -0.20   | Neutral       |
| 141 | p.Asn141Cys | 0.87 | -0.20 | Neutral       |      |       |               | 0.87  | -0.20   | Neutral       |
| 141 | p.Asn141Trp | 0.87 | -0.20 | Neutral       |      |       |               | 0.87  | -0.20   | Neutral       |
| 141 | p.Asn141Phe | 0.95 | -0.07 | Neutral       |      |       |               | 0.95  | -0.07   | Neutral       |
| 142 | p.His142Asn | 0.97 | -0.05 | Neutral       |      |       |               | 0.97  | -0.05   | Neutral       |
| 142 | p.His142Lys | 1.05 | 0.08  | Neutral       |      |       |               | 1.05  | 0.08    | Neutral       |
| 142 | p.His142Thr | 1.08 | 0.11  | Neutral       |      |       |               | 1.08  | 0.11    | Neutral       |
| 142 | p.His142Arg | 0.81 | -0.30 | Neutral       |      |       |               | 0.81  | -0.30   | Neutral       |
| 142 | p.His142Ser | 0.96 | -0.06 | Neutral       |      |       |               | 0.96  | -0.06   | Neutral       |
| 142 | p.His142Ile | 0.96 | -0.06 | Neutral       |      |       |               | 0.96  | -0.06   | Neutral       |
| 142 | p.His142Met | 0.99 | -0.02 | Neutral       |      |       |               | 0.99  | -0.02   | Neutral       |
| 142 | p.His142His | 1.00 | 0.00  | Neutral       |      |       |               | 1.00  | 0.00    | Neutral       |
| 142 | p.His142Gln | 1.09 | 0.12  | Neutral       |      |       |               | 1.09  | 0.12    | Neutral       |
| 142 | p.His142Pro | 0.95 | -0.07 | Neutral       |      |       |               | 0.95  | -0.07   | Neutral       |
| 142 | p.His142Leu | 0.91 | -0.14 | Neutral       |      |       |               | 0.91  | -0.14   | Neutral       |
| 142 | p.His142Asp | 1.09 | 0.12  | Neutral       |      |       |               | 1.09  | 0.12    | Neutral       |
| 142 | p.His142Glu | 0.97 | -0.04 | Neutral       |      |       |               | 0.97  | -0.04   | Neutral       |
| 142 | p.His142Ala | 0.96 | -0.05 | Neutral       |      |       |               | 0.96  | -0.05   | Neutral       |
| 142 | p.His142Gly | 0.94 | -0.09 | Neutral       |      |       |               | 0.94  | -0.09   | Neutral       |
| 142 | p.His142Val | 1.01 | 0.02  | Neutral       |      |       |               | 1.01  | 0.02    | Neutral       |
| 142 | p.His142Tyr | 0.90 | -0.15 | Neutral       |      |       |               | 0.90  | -0.15   | Neutral       |
| 142 | p.His142Cys | 0.96 | -0.05 | Neutral       |      |       |               | 0.96  | -0.05   | Neutral       |
| 142 | p.His142Trp | 0.91 | -0.13 | Neutral       |      |       |               | 0.91  | -0.13   | Neutral       |
| 142 | p.His142Phe | 1.12 | 0.17  | Neutral       |      |       |               | 1.12  | 0.17    | Neutral       |
| 143 | p.Ala143Asn | 1.00 | 0.01  | Neutral       |      |       |               | 1.00  | 0.01    | Neutral       |
| 143 | p.Ala143Lys | 0.97 | -0.05 | Neutral       |      |       |               | 0.97  | -0.05   | Neutral       |
| 143 | p.Ala143Thr | 0.96 | -0.06 | Neutral       |      |       |               | 0.96  | -0.06   | Neutral       |
| 143 | p.Ala143Arg | 0.97 | -0.05 | Neutral       |      |       |               | 0.97  | -0.05   | Neutral       |
| 143 | p.Ala143Ser | 0.93 | -0.10 | Neutral       |      |       |               | 0.93  | -0.10   | Neutral       |
| 143 | p.Ala143Ile | 0.92 | -0.12 | Neutral       |      |       |               | 0.92  | -0.12   | Neutral       |
| 143 | p.Ala143Met | 0.98 | -0.02 | Neutral       |      |       |               | 0.98  | -0.02   | Neutral       |
| 143 | p.Ala143His | 0.99 | -0.02 | Neutral       |      |       |               | 0.99  | -0.02   | Neutral       |
| 143 | p.Ala143Gln | 1.00 | 0.00  | Neutral       |      |       |               | 1.00  | 0.00    | Neutral       |
| 143 | p.Ala143Pro | 1.02 | 0.03  | Neutral       |      |       |               | 1.02  | 0.03    | Neutral       |
| 143 | p.Ala143Leu | 0.95 | -0.08 | Neutral       |      |       |               | 0.95  | -0.08   | Neutral       |
| 143 | p.Ala143Asp | 0.91 | -0.13 | Neutral       |      |       |               | 0.91  | -0.13   | Neutral       |
| 143 | p.Ala143Glu | 0.98 | -0.03 | Neutral       |      |       |               | 0.98  | -0.03   | Neutral       |
| 143 | p.Ala143Ala | 1.00 | 0.00  | Neutral       |      |       |               | 1.00  | 0.00    | Neutral       |
| 143 | p.Ala143Gly | 1.03 | 0.04  | Neutral       |      |       |               | 1.03  | 0.04    | Neutral       |
| 143 | p.Ala143Val | 0.96 | -0.05 | Neutral       |      |       |               | 0.96  | -0.05   | Neutral       |
| 143 | p.Ala143Tyr | 1.01 | 0.02  | Neutral       |      |       |               | 1.01  | 0.02    | Neutral       |

|     |             |      |       |               |      |       |               |
|-----|-------------|------|-------|---------------|------|-------|---------------|
| 143 | p.Ala143Cys | 1.04 | 0.06  | Neutral       | 1.04 | 0.06  | Neutral       |
| 143 | p.Ala143Trp | 1.09 | 0.13  | Neutral       | 1.09 | 0.13  | Neutral       |
| 143 | p.Ala143Phe | 1.01 | 0.01  | Neutral       | 1.01 | 0.01  | Neutral       |
| 144 | p.Arg144Asn | 0.88 | -0.18 | Neutral       | 0.88 | -0.18 | Neutral       |
| 144 | p.Arg144Lys | 0.90 | -0.15 | Neutral       | 0.90 | -0.15 | Neutral       |
| 144 | p.Arg144Thr | 0.89 | -0.16 | Neutral       | 0.89 | -0.16 | Neutral       |
| 144 | p.Arg144Arg | 1.00 | 0.00  | Neutral       | 1.00 | 0.00  | Neutral       |
| 144 | p.Arg144Ser | 0.88 | -0.18 | Neutral       | 0.88 | -0.18 | Neutral       |
| 144 | p.Arg144Ile | 0.92 | -0.11 | Neutral       | 0.92 | -0.11 | Neutral       |
| 144 | p.Arg144Met | 0.89 | -0.17 | Neutral       | 0.89 | -0.17 | Neutral       |
| 144 | p.Arg144His | 0.92 | -0.13 | Neutral       | 0.92 | -0.13 | Neutral       |
| 144 | p.Arg144Gln | 0.95 | -0.07 | Neutral       | 0.95 | -0.07 | Neutral       |
| 144 | p.Arg144Pro | 0.90 | -0.15 | Neutral       | 0.90 | -0.15 | Neutral       |
| 144 | p.Arg144Leu | 0.96 | -0.06 | Neutral       | 0.96 | -0.06 | Neutral       |
| 144 | p.Arg144Asp | 0.89 | -0.16 | Neutral       | 0.89 | -0.16 | Neutral       |
| 144 | p.Arg144Glu | 0.96 | -0.07 | Neutral       | 0.96 | -0.07 | Neutral       |
| 144 | p.Arg144Ala | 0.95 | -0.08 | Neutral       | 0.95 | -0.08 | Neutral       |
| 144 | p.Arg144Gly | 0.97 | -0.05 | Neutral       | 0.97 | -0.05 | Neutral       |
| 144 | p.Arg144Val | 0.91 | -0.14 | Neutral       | 0.91 | -0.14 | Neutral       |
| 144 | p.Arg144Tyr | 0.91 | -0.14 | Neutral       | 0.91 | -0.14 | Neutral       |
| 144 | p.Arg144Cys | 0.84 | -0.25 | Neutral       | 0.84 | -0.25 | Neutral       |
| 144 | p.Arg144Trp | 0.91 | -0.13 | Neutral       | 0.91 | -0.13 | Neutral       |
| 144 | p.Arg144Phe | 0.90 | -0.15 | Neutral       | 0.90 | -0.15 | Neutral       |
| 145 | p.Ile145Asn | 0.99 | -0.02 | Neutral       | 0.99 | -0.02 | Neutral       |
| 145 | p.Ile145Lys | 1.13 | 0.18  | Neutral       | 1.13 | 0.18  | Neutral       |
| 145 | p.Ile145Thr | 1.05 | 0.07  | Neutral       | 1.05 | 0.07  | Neutral       |
| 145 | p.Ile145Arg | 1.18 | 0.24  | Indeterminate | 1.18 | 0.24  | Indeterminate |
| 145 | p.Ile145Ser | 1.11 | 0.15  | Neutral       | 1.11 | 0.15  | Neutral       |
| 145 | p.Ile145Ile | 1.00 | 0.00  | Neutral       | 1.00 | 0.00  | Neutral       |
| 145 | p.Ile145Met | 1.21 | 0.28  | Indeterminate | 1.21 | 0.28  | Indeterminate |
| 145 | p.Ile145His | 0.94 | -0.08 | Neutral       | 0.94 | -0.08 | Neutral       |
| 145 | p.Ile145Gln | 1.10 | 0.14  | Neutral       | 1.10 | 0.14  | Neutral       |
| 145 | p.Ile145Pro | 0.97 | -0.04 | Neutral       | 0.97 | -0.04 | Neutral       |
| 145 | p.Ile145Leu | 1.04 | 0.05  | Neutral       | 1.04 | 0.05  | Neutral       |
| 145 | p.Ile145Asp | 1.04 | 0.05  | Neutral       | 1.04 | 0.05  | Neutral       |
| 145 | p.Ile145Glu | 1.05 | 0.06  | Neutral       | 1.05 | 0.06  | Neutral       |
| 145 | p.Ile145Ala | 1.15 | 0.20  | Neutral       | 1.15 | 0.20  | Neutral       |
| 145 | p.Ile145Gly | 0.98 | -0.03 | Neutral       | 0.98 | -0.03 | Neutral       |
| 145 | p.Ile145Val | 1.13 | 0.17  | Neutral       | 1.13 | 0.17  | Neutral       |
| 145 | p.Ile145Tyr | 1.02 | 0.03  | Neutral       | 1.02 | 0.03  | Neutral       |
| 145 | p.Ile145Cys | 0.92 | -0.12 | Neutral       | 0.92 | -0.12 | Neutral       |
| 145 | p.Ile145Trp | 1.04 | 0.05  | Neutral       | 1.04 | 0.05  | Neutral       |
| 145 | p.Ile145Phe | 0.98 | -0.03 | Neutral       | 0.98 | -0.03 | Neutral       |
| 146 | p.Asp146Asn | 1.05 | 0.07  | Neutral       | 1.05 | 0.07  | Neutral       |
| 146 | p.Asp146Lys | 0.78 | -0.36 | Neutral       | 0.78 | -0.36 | Neutral       |
| 146 | p.Asp146Thr | 0.95 | -0.07 | Neutral       | 0.95 | -0.07 | Neutral       |
| 146 | p.Asp146Arg | 0.95 | -0.07 | Neutral       | 0.95 | -0.07 | Neutral       |
| 146 | p.Asp146Ser | 0.88 | -0.18 | Neutral       | 0.88 | -0.18 | Neutral       |
| 146 | p.Asp146Ile | 0.79 | -0.33 | Neutral       | 0.79 | -0.33 | Neutral       |
| 146 | p.Asp146Met | 0.96 | -0.05 | Neutral       | 0.96 | -0.05 | Neutral       |
| 146 | p.Asp146His | 1.01 | 0.01  | Neutral       | 1.01 | 0.01  | Neutral       |
| 146 | p.Asp146Gln | 0.98 | -0.03 | Neutral       | 0.98 | -0.03 | Neutral       |
| 146 | p.Asp146Pro | 1.00 | 0.00  | Neutral       | 1.00 | 0.00  | Neutral       |
| 146 | p.Asp146Leu | 0.93 | -0.11 | Neutral       | 0.93 | -0.11 | Neutral       |
| 146 | p.Asp146Asp | 1.00 | 0.00  | Neutral       | 1.00 | 0.00  | Neutral       |
| 146 | p.Asp146Glu | 0.87 | -0.20 | Neutral       | 0.87 | -0.20 | Neutral       |
| 146 | p.Asp146Ala | 0.86 | -0.22 | Neutral       | 0.86 | -0.22 | Neutral       |
| 146 | p.Asp146Gly | 0.86 | -0.22 | Neutral       | 0.86 | -0.22 | Neutral       |
| 146 | p.Asp146Val | 0.86 | -0.21 | Neutral       | 0.86 | -0.21 | Neutral       |
| 146 | p.Asp146Tyr | 1.00 | 0.00  | Neutral       | 1.00 | 0.00  | Neutral       |
| 146 | p.Asp146Cys | 1.01 | 0.02  | Neutral       | 1.01 | 0.02  | Neutral       |
| 146 | p.Asp146Trp | 0.85 | -0.23 | Neutral       | 0.85 | -0.23 | Neutral       |
| 146 | p.Asp146Phe | 1.03 | 0.05  | Neutral       | 1.03 | 0.05  | Neutral       |
| 147 | p.Ala147Asn | 1.05 | 0.07  | Neutral       | 1.05 | 0.07  | Neutral       |
| 147 | p.Ala147Lys | 0.91 | -0.13 | Neutral       | 0.91 | -0.13 | Neutral       |
| 147 | p.Ala147Thr | 1.03 | 0.04  | Neutral       | 1.03 | 0.04  | Neutral       |
| 147 | p.Ala147Arg | 0.91 | -0.14 | Neutral       | 0.91 | -0.14 | Neutral       |
| 147 | p.Ala147Ser | 0.91 | -0.14 | Neutral       | 0.91 | -0.14 | Neutral       |
| 147 | p.Ala147Ile | 1.12 | 0.16  | Neutral       | 1.12 | 0.16  | Neutral       |
| 147 | p.Ala147Met | 1.08 | 0.11  | Neutral       | 1.08 | 0.11  | Neutral       |
| 147 | p.Ala147His | 0.89 | -0.17 | Neutral       | 0.89 | -0.17 | Neutral       |
| 147 | p.Ala147Gln | 1.42 | 0.50  | Indeterminate | 1.42 | 0.50  | Indeterminate |
| 147 | p.Ala147Pro | 0.88 | -0.18 | Neutral       | 0.88 | -0.18 | Neutral       |
| 147 | p.Ala147Leu | 1.07 | 0.09  | Neutral       | 1.07 | 0.09  | Neutral       |
| 147 | p.Ala147Asp | 1.12 | 0.17  | Neutral       | 1.12 | 0.17  | Neutral       |
| 147 | p.Ala147Glu | 0.94 | -0.09 | Neutral       | 0.94 | -0.09 | Neutral       |
| 147 | p.Ala147Ala | 1.00 | 0.00  | Neutral       | 1.00 | 0.00  | Neutral       |
| 147 | p.Ala147Gly | 0.98 | -0.03 | Neutral       | 0.98 | -0.03 | Neutral       |
| 147 | p.Ala147Val | 1.04 | 0.06  | Neutral       | 1.04 | 0.06  | Neutral       |
| 147 | p.Ala147Tyr | 0.89 | -0.16 | Neutral       | 0.89 | -0.16 | Neutral       |
| 147 | p.Ala147Cys | 0.92 | -0.12 | Neutral       | 0.92 | -0.12 | Neutral       |
| 147 | p.Ala147Trp | 0.93 | -0.10 | Neutral       | 0.93 | -0.10 | Neutral       |
| 147 | p.Ala147Phe | 0.89 | -0.16 | Neutral       | 0.89 | -0.16 | Neutral       |
| 148 | p.Ala148Asn | 1.32 | 0.40  | Indeterminate | 1.32 | 0.40  | Indeterminate |
| 148 | p.Ala148Lys | 2.00 | 1.00  | Indeterminate | 2.00 | 1.00  | Indeterminate |
| 148 | p.Ala148Thr | 0.92 | -0.12 | Neutral       | 0.92 | -0.12 | Neutral       |
| 148 | p.Ala148Arg | 1.44 | 0.53  | Indeterminate | 1.44 | 0.53  | Indeterminate |
| 148 | p.Ala148Ser | 1.08 | 0.11  | Neutral       | 1.08 | 0.11  | Neutral       |
| 148 | p.Ala148Ile | 1.15 | 0.20  | Neutral       | 1.15 | 0.20  | Neutral       |
| 148 | p.Ala148Met | 1.54 | 0.62  | Indeterminate | 1.54 | 0.62  | Indeterminate |
| 148 | p.Ala148His | 1.27 | 0.34  | Indeterminate | 1.27 | 0.34  | Indeterminate |
| 148 | p.Ala148Gln | 1.31 | 0.39  | Indeterminate | 1.31 | 0.39  | Indeterminate |
| 148 | p.Ala148Pro | 1.19 | 0.25  | Indeterminate | 1.19 | 0.25  | Indeterminate |
| 148 | p.Ala148Leu | 1.21 | 0.27  | Indeterminate | 1.21 | 0.27  | Indeterminate |
| 148 | p.Ala148Asp | 1.27 | 0.35  | Indeterminate | 1.27 | 0.35  | Indeterminate |
| 148 | p.Ala148Glu | 1.39 | 0.47  | Indeterminate | 1.39 | 0.47  | Indeterminate |
| 148 | p.Ala148Ala | 1.00 | 0.00  | Neutral       | 1.00 | 0.00  | Neutral       |
| 148 | p.Ala148Gly | 1.01 | 0.01  | Neutral       | 1.01 | 0.01  | Neutral       |
| 148 | p.Ala148Val | 1.55 | 0.63  | Indeterminate | 1.55 | 0.63  | Indeterminate |
| 148 | p.Ala148Tyr | 0.94 | -0.09 | Neutral       | 0.94 | -0.09 | Neutral       |
| 148 | p.Ala148Cys | 0.66 | -0.60 | Neutral       | 0.66 | -0.60 | Neutral       |
| 148 | p.Ala148Trp | 1.28 | 0.35  | Indeterminate | 1.28 | 0.35  | Indeterminate |
| 148 | p.Ala148Phe | 1.94 | 0.96  | Indeterminate | 1.94 | 0.96  | Indeterminate |
| 149 | p.Glu149Asn | 0.80 | -0.31 | Neutral       | 0.80 | -0.31 | Neutral       |
| 149 | p.Glu149Lys | 1.03 | 0.04  | Neutral       | 1.03 | 0.04  | Neutral       |
| 149 | p.Glu149Thr | 1.08 | 0.12  | Neutral       | 1.08 | 0.12  | Neutral       |

|     |             |      |       |               |      |       |               |       |         |               |
|-----|-------------|------|-------|---------------|------|-------|---------------|-------|---------|---------------|
| 149 | p.Glu149Arg | 0.85 | -0.24 | Neutral       |      |       | 0.85          | -0.24 | Neutral |               |
| 149 | p.Glu149Ser | 1.14 | 0.19  | Neutral       |      |       | 1.14          | 0.19  | Neutral |               |
| 149 | p.Glu149Ile | 1.10 | 0.14  | Neutral       |      |       | 1.10          | 0.14  | Neutral |               |
| 149 | p.Glu149Met | 0.79 | -0.34 | Neutral       |      |       | 0.79          | -0.34 | Neutral |               |
| 149 | p.Glu149His | 0.93 | -0.11 | Neutral       |      |       | 0.93          | -0.11 | Neutral |               |
| 149 | p.Glu149Gln | 0.88 | -0.19 | Neutral       |      |       | 0.88          | -0.19 | Neutral |               |
| 149 | p.Glu149Pro | 0.91 | -0.14 | Neutral       |      |       | 0.91          | -0.14 | Neutral |               |
| 149 | p.Glu149Leu | 0.92 | -0.13 | Neutral       |      |       | 0.92          | -0.13 | Neutral |               |
| 149 | p.Glu149Asp | 0.86 | -0.22 | Neutral       |      |       | 0.86          | -0.22 | Neutral |               |
| 149 | p.Glu149Glu | 1.00 | 0.00  | Neutral       |      |       | 1.00          | 0.00  | Neutral |               |
| 149 | p.Glu149Ala | 1.00 | 0.00  | Neutral       |      |       | 1.00          | 0.00  | Neutral |               |
| 149 | p.Glu149Gly | 0.98 | -0.02 | Neutral       |      |       | 0.98          | -0.02 | Neutral |               |
| 149 | p.Glu149Val | 0.99 | -0.01 | Neutral       |      |       | 0.99          | -0.01 | Neutral |               |
| 149 | p.Glu149Tyr | 1.02 | 0.03  | Neutral       |      |       | 1.02          | 0.03  | Neutral |               |
| 149 | p.Glu149Cys | 0.86 | -0.22 | Neutral       |      |       | 0.86          | -0.22 | Neutral |               |
| 149 | p.Glu149Trp | 1.00 | 0.00  | Neutral       |      |       | 1.00          | 0.00  | Neutral |               |
| 149 | p.Glu149Phe | 1.06 | 0.09  | Neutral       |      |       | 1.06          | 0.09  | Neutral |               |
| 150 | p.Gly150Asn | 0.89 | -0.17 | Neutral       |      |       | 0.89          | -0.17 | Neutral |               |
| 150 | p.Gly150Lys | 1.03 | 0.04  | Neutral       |      |       | 1.03          | 0.04  | Neutral |               |
| 150 | p.Gly150Thr | 0.96 | -0.06 | Neutral       |      |       | 0.96          | -0.06 | Neutral |               |
| 150 | p.Gly150Arg | 1.03 | 0.04  | Neutral       |      |       | 1.03          | 0.04  | Neutral |               |
| 150 | p.Gly150Ser | 0.99 | -0.01 | Neutral       |      |       | 0.99          | -0.01 | Neutral |               |
| 150 | p.Gly150Ile | 0.92 | -0.12 | Neutral       |      |       | 0.92          | -0.12 | Neutral |               |
| 150 | p.Gly150Met | 1.07 | 0.10  | Neutral       |      |       | 1.07          | 0.10  | Neutral |               |
| 150 | p.Gly150His | 1.04 | 0.05  | Neutral       |      |       | 1.04          | 0.05  | Neutral |               |
| 150 | p.Gly150Gln | 0.93 | -0.10 | Neutral       |      |       | 0.93          | -0.10 | Neutral |               |
| 150 | p.Gly150Pro | 1.00 | -0.01 | Neutral       |      |       | 1.00          | -0.01 | Neutral |               |
| 150 | p.Gly150Leu | 0.91 | -0.14 | Neutral       |      |       | 0.91          | -0.14 | Neutral |               |
| 150 | p.Gly150Asp | 0.97 | -0.05 | Neutral       |      |       | 0.97          | -0.05 | Neutral |               |
| 150 | p.Gly150Glu | 0.88 | -0.18 | Neutral       |      |       | 0.88          | -0.18 | Neutral |               |
| 150 | p.Gly150Ala | 0.86 | -0.21 | Neutral       |      |       | 0.86          | -0.21 | Neutral |               |
| 150 | p.Gly150Gly | 1.00 | 0.00  | Neutral       |      |       | 1.00          | 0.00  | Neutral |               |
| 150 | p.Gly150Val | 0.97 | -0.05 | Neutral       |      |       | 0.97          | -0.05 | Neutral |               |
| 150 | p.Gly150Tyr | 0.91 | -0.13 | Neutral       |      |       | 0.91          | -0.13 | Neutral |               |
| 150 | p.Gly150Cys | 0.77 | -0.38 | Neutral       |      |       | 0.77          | -0.38 | Neutral |               |
| 150 | p.Gly150Trp | 0.92 | -0.12 | Neutral       |      |       | 0.92          | -0.12 | Neutral |               |
| 150 | p.Gly150Phe | 0.99 | -0.01 | Neutral       |      |       | 0.99          | -0.01 | Neutral |               |
| 151 | p.Pro151Asn | 1.03 | 0.04  | Neutral       |      |       | 1.03          | 0.04  | Neutral |               |
| 151 | p.Pro151Lys | 0.94 | -0.09 | Neutral       |      |       | 0.94          | -0.09 | Neutral |               |
| 151 | p.Pro151Thr | 1.03 | 0.05  | Neutral       |      |       | 1.03          | 0.05  | Neutral |               |
| 151 | p.Pro151Arg | 0.84 | -0.26 | Neutral       |      |       | 0.84          | -0.26 | Neutral |               |
| 151 | p.Pro151Ser | 1.03 | 0.04  | Neutral       |      |       | 1.03          | 0.04  | Neutral |               |
| 151 | p.Pro151Ile | 0.99 | -0.01 | Neutral       |      |       | 0.99          | -0.01 | Neutral |               |
| 151 | p.Pro151Met | 0.92 | -0.12 | Neutral       |      |       | 0.92          | -0.12 | Neutral |               |
| 151 | p.Pro151His | 1.06 | 0.09  | Neutral       |      |       | 1.06          | 0.09  | Neutral |               |
| 151 | p.Pro151Gln | 0.90 | -0.15 | Neutral       |      |       | 0.90          | -0.15 | Neutral |               |
| 151 | p.Pro151Pro | 1.00 | 0.00  | Neutral       |      |       | 1.00          | 0.00  | Neutral |               |
| 151 | p.Pro151Leu | 1.01 | 0.02  | Neutral       |      |       | 1.01          | 0.02  | Neutral |               |
| 151 | p.Pro151Asp | 1.02 | 0.03  | Neutral       |      |       | 1.02          | 0.03  | Neutral |               |
| 151 | p.Pro151Glu | 1.06 | 0.08  | Neutral       |      |       | 1.06          | 0.08  | Neutral |               |
| 151 | p.Pro151Ala | 1.09 | 0.12  | Neutral       |      |       | 1.09          | 0.12  | Neutral |               |
| 151 | p.Pro151Gly | 1.13 | 0.17  | Neutral       |      |       | 1.13          | 0.17  | Neutral |               |
| 151 | p.Pro151Val | 0.95 | -0.08 | Neutral       |      |       | 0.95          | -0.08 | Neutral |               |
| 151 | p.Pro151Tyr | 0.88 | -0.18 | Neutral       |      |       | 0.88          | -0.18 | Neutral |               |
| 151 | p.Pro151Cys | 0.89 | -0.17 | Neutral       |      |       | 0.89          | -0.17 | Neutral |               |
| 151 | p.Pro151Trp | 0.88 | -0.18 | Neutral       |      |       | 0.88          | -0.18 | Neutral |               |
| 151 | p.Pro151Phe | 0.92 | -0.12 | Neutral       |      |       | 0.92          | -0.12 | Neutral |               |
| 152 | p.Ser152Asn | 0.87 | -0.20 | Neutral       |      |       | 0.87          | -0.20 | Neutral |               |
| 152 | p.Ser152Lys | 0.96 | -0.06 | Neutral       |      |       | 0.96          | -0.06 | Neutral |               |
| 152 | p.Ser152Thr | 0.96 | -0.06 | Neutral       |      |       | 0.96          | -0.06 | Neutral |               |
| 152 | p.Ser152Arg | 0.89 | -0.17 | Neutral       |      |       | 0.89          | -0.17 | Neutral |               |
| 152 | p.Ser152Ser | 1.00 | 0.00  | Neutral       |      |       | 1.00          | 0.00  | Neutral |               |
| 152 | p.Ser152Ile | 0.76 | -0.40 | Neutral       |      |       | 0.76          | -0.40 | Neutral |               |
| 152 | p.Ser152Met | 0.97 | -0.05 | Neutral       |      |       | 0.97          | -0.05 | Neutral |               |
| 152 | p.Ser152His | 0.89 | -0.17 | Neutral       |      |       | 0.89          | -0.17 | Neutral |               |
| 152 | p.Ser152Gln | 0.79 | -0.33 | Neutral       |      |       | 0.79          | -0.33 | Neutral |               |
| 152 | p.Ser152Pro | 0.98 | -0.03 | Neutral       |      |       | 0.98          | -0.03 | Neutral |               |
| 152 | p.Ser152Leu | 0.96 | -0.06 | Neutral       |      |       | 0.96          | -0.06 | Neutral |               |
| 152 | p.Ser152Asp | 0.89 | -0.17 | Neutral       |      |       | 0.89          | -0.17 | Neutral |               |
| 152 | p.Ser152Glu | 0.91 | -0.13 | Neutral       |      |       | 0.91          | -0.13 | Neutral |               |
| 152 | p.Ser152Ala | 1.04 | 0.06  | Neutral       |      |       | 1.04          | 0.06  | Neutral |               |
| 152 | p.Ser152Gly | 0.97 | -0.04 | Neutral       |      |       | 0.97          | -0.04 | Neutral |               |
| 152 | p.Ser152Val | 0.98 | -0.03 | Neutral       |      |       | 0.98          | -0.03 | Neutral |               |
| 152 | p.Ser152Tyr | 1.10 | 0.14  | Neutral       |      |       | 1.10          | 0.14  | Neutral |               |
| 152 | p.Ser152Cys | 0.75 | -0.42 | Neutral       |      |       | 0.75          | -0.42 | Neutral |               |
| 152 | p.Ser152Trp | 0.89 | -0.17 | Neutral       |      |       | 0.89          | -0.17 | Neutral |               |
| 152 | p.Ser152Phe | 0.88 | -0.19 | Neutral       |      |       | 0.88          | -0.19 | Neutral |               |
| 153 | p.Asp153Asn | 1.33 | 0.41  | Indeterminate | 0.83 | -0.28 | Neutral       | 1.08  | 0.11    | Neutral       |
| 153 | p.Asp153Lys | 0.99 | -0.02 | Neutral       | 1.33 | 0.41  | Indeterminate | 1.16  | 0.21    | Neutral       |
| 153 | p.Asp153Thr | 1.47 | 0.56  | Indeterminate | 1.10 | 0.14  | Neutral       | 1.29  | 0.36    | Indeterminate |
| 153 | p.Asp153Arg | 1.25 | 0.32  | Indeterminate | 1.37 | 0.46  | Indeterminate | 1.31  | 0.39    | Indeterminate |
| 153 | p.Asp153Ser | 0.82 | -0.29 | Neutral       | 0.72 | -0.47 | Neutral       | 0.77  | -0.37   | Neutral       |
| 153 | p.Asp153Ile | 0.91 | -0.14 | Neutral       | 1.16 | 0.22  | Neutral       | 1.04  | 0.05    | Neutral       |
| 153 | p.Asp153Met | 1.31 | 0.39  | Indeterminate | 0.92 | -0.12 | Neutral       | 1.11  | 0.16    | Neutral       |
| 153 | p.Asp153His | 1.34 | 0.42  | Indeterminate | 0.92 | -0.12 | Neutral       | 1.13  | 0.18    | Neutral       |
| 153 | p.Asp153Gln | 1.39 | 0.48  | Indeterminate | 0.95 | -0.07 | Neutral       | 1.17  | 0.23    | Neutral       |
| 153 | p.Asp153Pro | 0.68 | -0.56 | Neutral       | 0.53 | -0.93 | Neutral       | 0.60  | -0.73   | Neutral       |
| 153 | p.Asp153Leu | 1.34 | 0.43  | Indeterminate | 0.94 | -0.09 | Neutral       | 1.14  | 0.19    | Neutral       |
| 153 | p.Asp153Asp | 1.00 | 0.00  | Neutral       | 1.00 | 0.00  | Neutral       | 1.00  | 0.00    | Neutral       |
| 153 | p.Asp153Glu | 1.18 | 0.24  | Indeterminate | 0.82 | -0.29 | Neutral       | 1.00  | 0.00    | Neutral       |
| 153 | p.Asp153Ala | 0.67 | -0.57 | Neutral       | 0.98 | -0.03 | Neutral       | 0.83  | -0.27   | Neutral       |
| 153 | p.Asp153Gly | 0.72 | -0.47 | Neutral       | 0.64 | -0.64 | Neutral       | 0.68  | -0.55   | Neutral       |
| 153 | p.Asp153Val | 1.14 | 0.19  | Neutral       | 1.20 | 0.26  | Indeterminate | 1.17  | 0.23    | Neutral       |
| 153 | p.Asp153Tyr | 0.97 | -0.04 | Neutral       | 1.33 | 0.41  | Indeterminate | 1.15  | 0.20    | Neutral       |
| 153 | p.Asp153Cys | 1.41 | 0.50  | Indeterminate | 1.09 | 0.13  | Neutral       | 1.25  | 0.32    | Indeterminate |
| 153 | p.Asp153Trp | 1.25 | 0.32  | Indeterminate | 1.23 | 0.30  | Indeterminate | 1.24  | 0.31    | Indeterminate |
| 153 | p.Asp153Phe | 1.04 | 0.05  | Neutral       | 1.07 | 0.09  | Neutral       | 1.05  | 0.07    | Neutral       |
| 154 | p.Ile154Asn | 1.10 | 0.13  | Neutral       |      |       | 1.10          | 0.13  | Neutral |               |
| 154 | p.Ile154Lys | 0.91 | -0.13 | Neutral       |      |       | 0.91          | -0.13 | Neutral |               |
| 154 | p.Ile154Thr | 1.09 | 0.13  | Neutral       |      |       | 1.09          | 0.13  | Neutral |               |
| 154 | p.Ile154Arg | 1.04 | 0.06  | Neutral       |      |       | 1.04          | 0.06  | Neutral |               |
| 154 | p.Ile154Ser | 0.86 | -0.21 | Neutral       |      |       | 0.86          | -0.21 | Neutral |               |
| 154 | p.Ile154Ile | 1.00 | 0.00  | Neutral       |      |       | 1.00          | 0.00  | Neutral |               |
| 154 | p.Ile154Met | 1.03 | 0.05  | Neutral       |      |       | 1.03          | 0.05  | Neutral |               |
| 154 | p.Ile154His | 1.13 | 0.17  | Neutral       |      |       | 1.13          | 0.17  | Neutral |               |
| 154 | p.Ile154Gln | 1.00 | 0.00  | Neutral       |      |       | 1.00          | 0.00  | Neutral |               |

|     |             |      |       |               |      |       |               |
|-----|-------------|------|-------|---------------|------|-------|---------------|
| 154 | p.Ile154Pro | 1.13 | 0.18  | Neutral       | 1.13 | 0.18  | Neutral       |
| 154 | p.Ile154Leu | 0.93 | -0.11 | Neutral       | 0.93 | -0.11 | Neutral       |
| 154 | p.Ile154Asp | 0.99 | -0.01 | Neutral       | 0.99 | -0.01 | Neutral       |
| 154 | p.Ile154Glu | 1.06 | 0.09  | Neutral       | 1.06 | 0.09  | Neutral       |
| 154 | p.Ile154Ala | 1.27 | 0.34  | Indeterminate | 1.27 | 0.34  | Indeterminate |
| 154 | p.Ile154Gly | 0.87 | -0.20 | Neutral       | 0.87 | -0.20 | Neutral       |
| 154 | p.Ile154Val | 1.20 | 0.26  | Indeterminate | 1.20 | 0.26  | Indeterminate |
| 154 | p.Ile154Tyr | 1.15 | 0.20  | Neutral       | 1.15 | 0.20  | Neutral       |
| 154 | p.Ile154Cys | 1.13 | 0.18  | Neutral       | 1.13 | 0.18  | Neutral       |
| 154 | p.Ile154Trp | 1.23 | 0.30  | Indeterminate | 1.23 | 0.30  | Indeterminate |
| 154 | p.Ile154Phe | 1.06 | 0.08  | Neutral       | 1.06 | 0.08  | Neutral       |
| 155 | p.Pro155Asn | 0.98 | -0.02 | Neutral       | 0.98 | -0.02 | Neutral       |
| 155 | p.Pro155Lys | 1.19 | 0.25  | Indeterminate | 1.19 | 0.25  | Indeterminate |
| 155 | p.Pro155Thr | 0.18 | -2.43 | Neutral       | 0.18 | -2.43 | Neutral       |
| 155 | p.Pro155Arg | 0.90 | -0.15 | Neutral       | 0.90 | -0.15 | Neutral       |
| 155 | p.Pro155Ser | 2.13 | 1.09  | Deleterious   | 2.13 | 1.09  | Deleterious   |
| 155 | p.Pro155Ile | 1.37 | 0.45  | Indeterminate | 1.37 | 0.45  | Indeterminate |
| 155 | p.Pro155Met | 0.58 | -0.78 | Neutral       | 0.58 | -0.78 | Neutral       |
| 155 | p.Pro155His | 1.63 | 0.71  | Indeterminate | 1.63 | 0.71  | Indeterminate |
| 155 | p.Pro155Gln | 0.46 | -1.11 | Neutral       | 0.46 | -1.11 | Neutral       |
| 155 | p.Pro155Pro | 1.00 | 0.00  | Neutral       | 1.00 | 0.00  | Neutral       |
| 155 | p.Pro155Leu | 0.50 | -1.00 | Neutral       | 0.50 | -1.00 | Neutral       |
| 155 | p.Pro155Asp | 2.39 | 1.26  | Deleterious   | 2.39 | 1.26  | Deleterious   |
| 155 | p.Pro155Glu | 0.55 | -0.87 | Neutral       | 0.55 | -0.87 | Neutral       |
| 155 | p.Pro155Ala | 0.18 | -2.45 | Neutral       | 0.18 | -2.45 | Neutral       |
| 155 | p.Pro155Gly | 0.71 | -0.49 | Neutral       | 0.71 | -0.49 | Neutral       |
| 155 | p.Pro155Val | 1.99 | 0.99  | Indeterminate | 1.99 | 0.99  | Indeterminate |
| 155 | p.Pro155Tyr | 0.70 | -0.51 | Neutral       | 0.70 | -0.51 | Neutral       |
| 155 | p.Pro155Cys | 0.39 | -1.35 | Neutral       | 0.39 | -1.35 | Neutral       |
| 155 | p.Pro155Trp | 1.59 | 0.67  | Indeterminate | 1.59 | 0.67  | Indeterminate |
| 155 | p.Pro155Phe | 0.19 | -2.36 | Neutral       | 0.19 | -2.36 | Neutral       |
| 156 | p.Asp156Asn | 1.05 | 0.06  | Neutral       | 1.05 | 0.06  | Neutral       |
| 156 | p.Asp156Lys | 0.99 | -0.01 | Neutral       | 0.99 | -0.01 | Neutral       |
| 156 | p.Asp156Thr | 1.07 | 0.10  | Neutral       | 1.07 | 0.10  | Neutral       |
| 156 | p.Asp156Arg | 1.01 | 0.01  | Neutral       | 1.01 | 0.01  | Neutral       |
| 156 | p.Asp156Ser | 1.01 | 0.02  | Neutral       | 1.01 | 0.02  | Neutral       |
| 156 | p.Asp156Ile | 0.97 | -0.04 | Neutral       | 0.97 | -0.04 | Neutral       |
| 156 | p.Asp156Met | 0.99 | -0.01 | Neutral       | 0.99 | -0.01 | Neutral       |
| 156 | p.Asp156His | 0.98 | -0.04 | Neutral       | 0.98 | -0.04 | Neutral       |
| 156 | p.Asp156Gln | 1.19 | 0.25  | Indeterminate | 1.19 | 0.25  | Indeterminate |
| 156 | p.Asp156Pro | 0.99 | -0.02 | Neutral       | 0.99 | -0.02 | Neutral       |
| 156 | p.Asp156Leu | 1.09 | 0.12  | Neutral       | 1.09 | 0.12  | Neutral       |
| 156 | p.Asp156Asp | 1.00 | 0.00  | Neutral       | 1.00 | 0.00  | Neutral       |
| 156 | p.Asp156Glu | 1.05 | 0.07  | Neutral       | 1.05 | 0.07  | Neutral       |
| 156 | p.Asp156Ala | 1.27 | 0.34  | Indeterminate | 1.27 | 0.34  | Indeterminate |
| 156 | p.Asp156Gly | 1.10 | 0.14  | Neutral       | 1.10 | 0.14  | Neutral       |
| 156 | p.Asp156Val | 1.13 | 0.18  | Neutral       | 1.13 | 0.18  | Neutral       |
| 156 | p.Asp156Tyr | 1.13 | 0.17  | Neutral       | 1.13 | 0.17  | Neutral       |
| 156 | p.Asp156Cys | 1.10 | 0.14  | Neutral       | 1.10 | 0.14  | Neutral       |
| 156 | p.Asp156Trp | 0.90 | -0.15 | Neutral       | 0.90 | -0.15 | Neutral       |
| 156 | p.Asp156Phe | 1.00 | 0.00  | Neutral       | 1.00 | 0.00  | Neutral       |
