# Supplementary material
Source: PubMed Central journal article supplement (PMC11422873)
Supplement: media-8.pdf [file media-8.pdf]

**Appendix 1-table 8. Assessment of in silico variant effect prediction models.**

| <b>In silico model</b> | <b>Accuracy (%)</b> | <b>Sensitivity</b> | <b>Specificity</b> | <b>Positive predictive value</b> | <b>Negative predictive value</b> |
|------------------------|---------------------|--------------------|--------------------|----------------------------------|----------------------------------|
| CADD                   | 45.1                | 0.97               | 0.35               | 0.23                             | 0.98                             |
| Polyphen-2             | 39.5                | 0.98               | 0.27               | 0.22                             | 0.98                             |
| SIFT                   | 60.9                | 0.79               | 0.57               | 0.28                             | 0.93                             |
| VEST                   | 71.9                | 0.91               | 0.68               | 0.38                             | 0.97                             |
| AlphaMissense          | 71.6                | 0.94               | 0.67               | 0.38                             | 0.98                             |
| ESM1b                  | 59.2                | 0.95               | 0.51               | 0.30                             | 0.98                             |
| PrimateAI-3D           | 85.4                | 0.25               | 0.98               | 0.68                             | 0.87                             |
