# Supplementary material
Source: PubMed Central journal article supplement (PMC11422873)
Supplement: media-9.pdf [file media-9.pdf]

**Appendix 1-table 9. Missense somatic mutations in *CDKN2A* reported in COSMIC, TCGA, JHU, MSK-IMPACT.**

| CDKN2A amino acid residue | Variant    | Number of patients with mutation reported |      |     |            | Characteristic |
|---------------------------|------------|-------------------------------------------|------|-----|------------|----------------|
|                           |            | COSMIC                                    | TCGA | JHU | MSK-IMPACT |                |
| 2                         | p.Glu2Lys  | 3                                         | -    | -   | 1          | Neutral        |
| 4                         | p.Ala4Ser  | 1                                         | -    | -   | -          | Deleterious    |
| 5                         | p.Ala5Thr  | 2                                         | -    | -   | -          | Neutral        |
| 6                         | p.Gly6Glu  | 2                                         | -    | -   | -          | Neutral        |
| 7                         | p.Ser7Arg  | 1                                         | -    | -   | -          | Neutral        |
| 8                         | p.Ser8Ile  | 1                                         | 1    | -   | -          | Neutral        |
| 8                         | p.Ser8Arg  | 1                                         | 1    | -   | -          | Neutral        |
| 9                         | p.Met9Ile  | 2                                         | -    | -   | -          | Neutral        |
| 10                        | p.Glu10Val | 1                                         | -    | -   | 1          | Neutral        |
| 12                        | p.Ser12Leu | 5                                         | 1    | -   | 3          | Indeterminate  |
| 13                        | p.Ala13Thr | 1                                         | 1    | -   | -          | Neutral        |
| 14                        | p.Asp14Glu | 3                                         | -    | -   | 1          | Neutral        |
| 14                        | p.Asp14Gly | 2                                         | -    | -   | -          | Neutral        |
| 14                        | p.Asp14Asn | 2                                         | -    | -   | 1          | Neutral        |
| 14                        | p.Asp14Val | 1                                         | -    | -   | -          | Indeterminate  |
| 16                        | p.Leu16Pro | 4                                         | -    | -   | -          | Deleterious    |
| 16                        | p.Leu16Gln | 1                                         | 1    | -   | -          | Deleterious    |
| 16                        | p.Leu16Arg | 1                                         | 1    | -   | -          | Deleterious    |
| 17                        | p.Ala17Gly | 1                                         | -    | -   | -          | Neutral        |
| 18                        | p.Thr18Ala | 1                                         | -    | -   | -          | Indeterminate  |
| 18                        | p.Thr18Met | 1                                         | -    | -   | -          | Indeterminate  |
| 19                        | p.Ala19Pro | 1                                         | -    | -   | -          | Deleterious    |
| 20                        | p.Ala20Glu | 3                                         | 1    | -   | -          | Deleterious    |
| 20                        | p.Ala20Pro | 2                                         | 1    | -   | -          | Deleterious    |
| 20                        | p.Ala20Arg | 1                                         | -    | -   | -          | Deleterious    |
| 20                        | p.Ala20Ser | 2                                         | -    | -   | -          | Indeterminate  |
| 20                        | p.Ala20Thr | 4                                         | -    | -   | -          | Indeterminate  |
| 21                        | p.Ala21Asp | 3                                         | -    | -   | 1          | Deleterious    |
| 21                        | p.Ala21Pro | 1                                         | -    | -   | -          | Deleterious    |
| 22                        | p.Arg22Pro | 4                                         | 1    | -   | -          | Deleterious    |
| 23                        | p.Gly23Cys | 1                                         | 1    | -   | -          | Deleterious    |
| 23                        | p.Gly23Asp | 1                                         | 1    | -   | -          | Deleterious    |
| 23                        | p.Gly23Arg | 2                                         | 1    | 1   | -          | Deleterious    |
| 23                        | p.Gly23Ser | 3                                         | -    | -   | -          | Deleterious    |
| 23                        | p.Gly23Val | 5                                         | 1    | -   | -          | Deleterious    |
| 24                        | p.Arg24Gly | 1                                         | 1    | -   | -          | Neutral        |
| 24                        | p.Arg24Pro | 8                                         | -    | -   | 1          | Deleterious    |
| 24                        | p.Arg24Gln | 1                                         | -    | -   | -          | Indeterminate  |
| 25                        | p.Val25Gly | 2                                         | -    | -   | -          | Indeterminate  |
| 26                        | p.Glu26Asp | 1                                         | -    | -   | -          | Neutral        |
| 26                        | p.Glu26Lys | 1                                         | -    | -   | -          | Neutral        |
| 28                        | p.Val28Gly | 2                                         | -    | -   | -          | Indeterminate  |
| 29                        | p.Arg29Pro | 3                                         | -    | -   | -          | Deleterious    |
| 29                        | p.Arg29Trp | 1                                         | -    | -   | -          | Neutral        |
| 30                        | p.Ala30Pro | 1                                         | -    | -   | -          | Deleterious    |
| 30                        | p.Ala30Val | 4                                         | -    | -   | -          | Indeterminate  |
| 31                        | p.Leu31Pro | 1                                         | -    | -   | -          | Deleterious    |
| 31                        | p.Leu31Arg | 1                                         | 1    | -   | -          | Neutral        |
| 31                        | p.Leu31Val | 1                                         | 1    | -   | -          | Indeterminate  |
| 32                        | p.Leu32Pro | 3                                         | 1    | -   | 2          | Deleterious    |
| 32                        | p.Leu32Gln | 2                                         | -    | -   | 2          | Indeterminate  |
| 33                        | p.Glu33Asp | 1                                         | -    | -   | -          | Neutral        |
| 34                        | p.Ala34Asp | 1                                         | -    | -   | -          | Neutral        |
| 35                        | p.Gly35Ala | 1                                         | -    | -   | -          | Indeterminate  |
| 35                        | p.Gly35Glu | 1                                         | -    | -   | -          | Indeterminate  |
| 35                        | p.Gly35Arg | 2                                         | -    | -   | -          | Neutral        |
| 35                        | p.Gly35Val | 3                                         | -    | -   | -          | Deleterious    |
| 35                        | p.Gly35Trp | 2                                         | -    | -   | 1          | Deleterious    |
| 36                        | p.Ala36Gly | 3                                         | -    | -   | -          | Indeterminate  |

|    |            |    |   |   |   |               |
|----|------------|----|---|---|---|---------------|
| 36 | p.Ala36Ser | -  | 1 | - | - | Neutral       |
| 36 | p.Ala36Thr | 1  | - | - | - | Indeterminate |
| 38 | p.Pro38His | 1  | - | - | 1 | Deleterious   |
| 38 | p.Pro38Leu | 2  | - | - | - | Indeterminate |
| 38 | p.Pro38Ser | 1  | - | - | - | Indeterminate |
| 38 | p.Pro38Thr | -  | - | 1 | - | Indeterminate |
| 39 | p.Asn39Ile | 1  | - | - | 1 | Indeterminate |
| 39 | p.Asn39Lys | 1  | - | - | - | Indeterminate |
| 40 | p.Ala40Pro | 1  | - | - | - | Indeterminate |
| 42 | p.Asn42Asp | 1  | - | - | - | Indeterminate |
| 42 | p.Asn42His | 4  | 1 | - | 1 | Deleterious   |
| 42 | p.Asn42Ile | 2  | 1 | - | - | Deleterious   |
| 42 | p.Asn42Tyr | 2  | - | - | 1 | Deleterious   |
| 43 | p.Ser43Ile | -  | 1 | - | - | Indeterminate |
| 43 | p.Ser43Arg | 1  | - | - | - | Neutral       |
| 44 | p.Tyr44Cys | 1  | 1 | - | - | Neutral       |
| 45 | p.Gly45Asp | 3  | - | - | - | Neutral       |
| 45 | p.Gly45Ser | 1  | - | - | - | Indeterminate |
| 47 | p.Arg47Met | 1  | - | - | 1 | Neutral       |
| 48 | p.Pro48Leu | 28 | 6 | - | 4 | Deleterious   |
| 48 | p.Pro48Gln | 1  | 2 | - | - | Deleterious   |
| 48 | p.Pro48Arg | 3  | 1 | - | - | Deleterious   |
| 48 | p.Pro48Ser | 2  | 1 | - | - | Neutral       |
| 49 | p.Ile49Asn | 2  | - | - | 1 | Deleterious   |
| 49 | p.Ile49Ser | 2  | - | - | - | Deleterious   |
| 49 | p.Ile49Thr | 3  | - | - | - | Indeterminate |
| 50 | p.Gln50His | 3  | 1 | - | 1 | Deleterious   |
| 50 | p.Gln50Leu | 2  | - | - | - | Indeterminate |
| 50 | p.Gln50Arg | 3  | 1 | - | 2 | Deleterious   |
| 51 | p.Val51Ala | 3  | - | - | - | Neutral       |
| 51 | p.Val51Asp | 4  | - | - | - | Deleterious   |
| 51 | p.Val51Phe | 2  | - | 1 | - | Deleterious   |
| 51 | p.Val51Ile | 3  | - | - | - | Neutral       |
| 52 | p.Met52Ile | 1  | - | 1 | - | Indeterminate |
| 52 | p.Met52Lys | 3  | - | - | - | Deleterious   |
| 52 | p.Met52Leu | 1  | - | - | - | Neutral       |
| 52 | p.Met52Arg | 3  | 1 | - | - | Deleterious   |
| 53 | p.Met53Ile | 9  | 1 | 3 | 1 | Deleterious   |
| 53 | p.Met53Val | -  | - | 2 | - | Deleterious   |
| 54 | p.Met54Leu | -  | - | 1 | - | Neutral       |
| 55 | p.Gly55Cys | 1  | - | 1 | - | Deleterious   |
| 55 | p.Gly55Asp | 2  | - | - | - | Deleterious   |
| 55 | p.Gly55Arg | 3  | - | - | - | Deleterious   |
| 55 | p.Gly55Val | 3  | - | 1 | 1 | Deleterious   |
| 56 | p.Ser56Asn | 1  | - | 1 | - | Neutral       |
| 56 | p.Ser56Arg | 1  | 1 | - | - | Neutral       |
| 57 | p.Ala57Phe | 1  | - | - | - | Indeterminate |
| 57 | p.Ala57Pro | 1  | - | - | - | Neutral       |
| 57 | p.Ala57Ser | 2  | - | - | - | Neutral       |
| 57 | p.Ala57Thr | 2  | - | - | - | Neutral       |
| 57 | p.Ala57Val | 6  | - | 2 | - | Neutral       |
| 58 | p.Arg58Gln | 2  | - | - | - | Neutral       |
| 58 | p.Val58Leu | -  | - | 1 | - | Neutral       |
| 59 | p.Val59Met | 1  | - | - | - | Neutral       |
| 60 | p.Ala60Glu | 1  | - | - | - | Indeterminate |
| 60 | p.Ala60Ser | 1  | - | - | - | Indeterminate |
| 60 | p.Ala60Thr | -  | - | 1 | - | Neutral       |
| 60 | p.Ala60Val | 5  | 1 | - | 1 | Neutral       |
| 61 | p.Glu61Lys | 1  | 1 | - | - | Neutral       |
| 61 | p.Glu61Val | -  | - | 1 | - | Neutral       |
| 62 | p.Leu62Met | -  | 1 | 1 | - | Neutral       |
| 62 | p.Leu62Pro | 3  | - | - | 2 | Indeterminate |
| 63 | p.Leu63Gln | 5  | - | 1 | 3 | Deleterious   |

|    |            |    |   |   |   |               |
|----|------------|----|---|---|---|---------------|
| 63 | p.Leu63Arg | 1  | - | 1 | - | Deleterious   |
| 63 | p.Leu63Val | 1  | - | - | - | Deleterious   |
| 64 | p.Leu64Pro | 2  | 1 | 2 | - | Deleterious   |
| 65 | p.Leu65Pro | 1  | - | - | - | Deleterious   |
| 65 | p.Leu65Val | -  | - | 1 | - | Neutral       |
| 66 | p.His66Leu | 1  | - | - | - | Neutral       |
| 66 | p.His66Arg | 5  | - | 3 | - | Neutral       |
| 66 | p.His66Tyr | 1  | - | 1 | - | Neutral       |
| 67 | p.Gly67Cys | 2  | - | - | 1 | Neutral       |
| 67 | p.Gly67Asp | 2  | - | - | - | Neutral       |
| 67 | p.Gly67Ser | 5  | - | 1 | - | Neutral       |
| 67 | p.Gly67Val | -  | 1 | - | - | Deleterious   |
| 68 | p.Ala68Glu | 2  | - | - | 1 | Indeterminate |
| 68 | p.Ala68Gly | 1  | - | - | - | Neutral       |
| 68 | p.Ala68Pro | 2  | 1 | 1 | - | Deleterious   |
| 68 | p.Ala68Thr | 8  | - | - | 1 | Neutral       |
| 68 | p.Ala68Val | 2  | - | 3 | - | Indeterminate |
| 69 | p.Glu69Asp | 3  | - | - | - | Neutral       |
| 69 | p.Glu69Gly | -  | - | 4 | - | Indeterminate |
| 69 | p.Glu69Lys | 1  | - | - | - | Indeterminate |
| 69 | p.Glu69Val | 1  | - | - | - | Indeterminate |
| 70 | p.Pro70Leu | 4  | - | 2 | 2 | Neutral       |
| 70 | p.Pro70Arg | 1  | - | - | - | Neutral       |
| 70 | p.Pro70Ser | 1  | - | - | - | Indeterminate |
| 71 | p.Asn71Asp | 1  | - | - | - | Indeterminate |
| 71 | p.Asn71His | -  | - | 1 | - | Indeterminate |
| 71 | p.Asn71Ile | 2  | - | - | - | Deleterious   |
| 71 | p.Asn71Lys | -  | 1 | - | - | Deleterious   |
| 71 | p.Asn71Ser | -  | - | 1 | - | Deleterious   |
| 71 | p.Asn71Tyr | 1  | - | - | - | Deleterious   |
| 72 | p.Cys72Gly | 1  | - | - | - | Neutral       |
| 72 | p.Cys72ser | -  | - | 1 | - | Indeterminate |
| 72 | p.Cys72Tyr | -  | - | 1 | - | Neutral       |
| 73 | p.Ala73Asp | 2  | 1 | - | - | Neutral       |
| 73 | p.Ala73Ser | 1  | - | - | - | Neutral       |
| 74 | p.Asp74Ala | 5  | - | - | - | Deleterious   |
| 74 | p.Asp74Gly | 1  | - | 3 | - | Deleterious   |
| 74 | p.Asp74Asn | 10 | 1 | 2 | 2 | Deleterious   |
| 74 | p.Asp74Val | 3  | 1 | 1 | - | Deleterious   |
| 74 | p.Asp74Tyr | 9  | 1 | 2 | 2 | Deleterious   |
| 75 | p.Pro75Ser | 1  | - | 1 | - | Neutral       |
| 75 | p.Pro75Thr | 1  | - | - | - | Neutral       |
| 76 | p.Ala76Gly | 1  | - | - | 1 | Neutral       |
| 76 | p.Ala76Ser | 1  | - | - | - | Indeterminate |
| 76 | p.Ala76Thr | 7  | 1 | - | - | Neutral       |
| 76 | p.Ala76Val | 6  | - | - | - | Neutral       |
| 77 | p.Thr77Ile | 1  | 1 | 1 | - | Neutral       |
| 77 | p.Thr77Ser | 1  | - | - | - | Indeterminate |
| 78 | p.Leu78Phe | -  | - | 2 | - | Neutral       |
| 78 | p.Leu78His | 1  | - | - | - | Neutral       |
| 79 | p.Thr79Ala | 1  | - | - | - | Neutral       |
| 79 | p.Thr79Ile | 5  | - | - | - | Neutral       |
| 79 | p.Thr79Asn | -  | - | 1 | - | Neutral       |
| 79 | p.Thr79Pro | 1  | - | - | 1 | Deleterious   |
| 80 | p.Arg80Leu | -  | - | 1 | - | Indeterminate |
| 80 | p.Arg80Pro | -  | - | 1 | - | Deleterious   |
| 80 | p.Arg80Gln | 4  | 1 | - | - | Indeterminate |
| 81 | p.Pro81Ala | 1  | - | - | - | Indeterminate |
| 81 | p.Pro81His | 3  | 1 | 1 | - | Deleterious   |
| 81 | p.Pro81Leu | 28 | 5 | 6 | 3 | Deleterious   |
| 81 | p.Pro81Arg | 3  | - | - | 1 | Deleterious   |
| 81 | p.Pro81Ser | 2  | - | 1 | - | Deleterious   |
| 82 | p.Val82Glu | 2  | 1 | - | - | Indeterminate |

|     |             |     |    |    |    |               |
|-----|-------------|-----|----|----|----|---------------|
| 82  | p.Val82Gly  | 1   | -  | 1  | -  | Indeterminate |
| 82  | p.Val82Leu  | 2   | -  | -  | 1  | Neutral       |
| 82  | p.Val82Met  | 8   | 2  | 1  | -  | Neutral       |
| 83  | p.His83Asp  | 8   | 3  | 2  | 2  | Deleterious   |
| 83  | p.His83Leu  | 2   | 1  | 2  | -  | Deleterious   |
| 83  | p.His83Asn  | 4   | -  | 1  | 1  | Deleterious   |
| 83  | p.His83Pro  | 4   | -  | -  | -  | Deleterious   |
| 83  | p.His83Gln  | 2   | 1  | -  | 1  | Deleterious   |
| 83  | p.His83Arg  | 13  | 2  | 2  | 1  | Deleterious   |
| 83  | p.His83Tyr  | 139 | 18 | 17 | 32 | Deleterious   |
| 84  | p.Asp84Ala  | 2   | -  | 1  | 1  | Deleterious   |
| 84  | p.Asp84Gly  | 15  | 3  | 2  | 2  | Deleterious   |
| 84  | p.Asp84His  | 3   | -  | 1  | -  | Deleterious   |
| 84  | p.Asp84Asn  | 40  | 10 | 3  | 4  | Deleterious   |
| 84  | p.Asp84Val  | 5   | 1  | -  | 2  | Deleterious   |
| 84  | p.Asp84Tyr  | 24  | 4  | 8  | 5  | Deleterious   |
| 85  | p.Ala85Pro  | 5   | 1  | 1  | 2  | Indeterminate |
| 85  | p.Ala85Ser  | 1   | -  | 1  | -  | Neutral       |
| 85  | p.Ala85Thr  | 3   | 2  | -  | -  | Indeterminate |
| 86  | p.Ala86Asp  | 4   | 1  | -  | -  | Deleterious   |
| 86  | p.Ala86Pro  | -   | 1  | -  | -  | Deleterious   |
| 87  | p.Arg87Leu  | 1   | -  | 1  | -  | Indeterminate |
| 87  | p.Arg87Pro  | 3   | -  | 1  | 2  | Deleterious   |
| 87  | p.Arg87Trp  | 3   | -  | 2  | -  | Deleterious   |
| 88  | p.Glu88Ala  | 1   | -  | -  | -  | Neutral       |
| 88  | p.Glu88Asp  | 2   | -  | -  | -  | Indeterminate |
| 88  | p.Glu88Lys  | 15  | 5  | 1  | 3  | Indeterminate |
| 88  | p.Glu88Val  | 1   | -  | -  | -  | Neutral       |
| 89  | p.Gly89Cys  | 2   | -  | -  | 2  | Deleterious   |
| 89  | p.Gly89Asp  | -   | -  | 1  | -  | Deleterious   |
| 89  | p.Gly89Phe  | -   | -  | 1  | -  | Deleterious   |
| 89  | p.Gly89Ser  | 4   | -  | 1  | 1  | Deleterious   |
| 89  | p.Gly89Val  | 2   | 1  | -  | -  | Deleterious   |
| 90  | p.Phe90Leu  | 10  | 1  | -  | 1  | Neutral       |
| 91  | p.Leu91Gln  | 1   | -  | -  | -  | Neutral       |
| 92  | p.Asp92Tyr  | 1   | -  | -  | 1  | Neutral       |
| 93  | p.Thr93Ala  | 1   | -  | -  | -  | Indeterminate |
| 93  | p.Thr93Lys  | 6   | -  | -  | 1  | Deleterious   |
| 93  | p.Thr93Met  | 6   | -  | -  | 1  | Indeterminate |
| 93  | p.Thr93Arg  | 1   | -  | -  | -  | Indeterminate |
| 94  | p.Leu94Pro  | 2   | 1  | -  | -  | Deleterious   |
| 94  | p.Leu94Gln  | -   | 1  | -  | -  | Deleterious   |
| 95  | p.Val95Ala  | 1   | -  | -  | -  | Neutral       |
| 95  | p.Val95Leu  | 2   | -  | -  | -  | Neutral       |
| 95  | p.Val95Met  | 1   | -  | -  | -  | Indeterminate |
| 97  | p.Leu97Pro  | 3   | -  | -  | -  | Deleterious   |
| 97  | p.Leu97Arg  | 4   | -  | -  | -  | Deleterious   |
| 98  | p.His98Pro  | 4   | 2  | 1  | 1  | Deleterious   |
| 98  | p.His98Tyr  | 2   | -  | -  | 1  | Neutral       |
| 99  | p.Arg99Gln  | 4   | -  | -  | 1  | Neutral       |
| 99  | p.Arg99Trp  | 1   | -  | 1  | -  | Indeterminate |
| 100 | p.Ala100Pro | 1   | -  | -  | -  | Deleterious   |
| 100 | p.Ala100Ser | 3   | -  | 2  | -  | Neutral       |
| 100 | p.Ala100Thr | 2   | -  | -  | -  | Neutral       |
| 100 | p.Ala100Val | 2   | -  | -  | -  | Neutral       |
| 101 | p.Gly101Val | 4   | 2  | 4  | -  | Deleterious   |
| 101 | p.Gly101Trp | 8   | 1  | 4  | 1  | Deleterious   |
| 102 | p.Ala102Glu | 7   | 1  | 2  | -  | Deleterious   |
| 102 | p.Ala102Thr | 3   | -  | 1  | -  | Deleterious   |
| 102 | p.Ala102Val | 10  | 1  | 4  | 2  | Indeterminate |
| 103 | p.Arg103Gln | 1   | -  | 1  | -  | Neutral       |
| 103 | p.Arg103Trp | 2   | 1  | -  | 1  | Neutral       |
| 104 | p.Leu104Gln | 1   | 1  | -  | -  | Neutral       |

|     |             |    |    |    |    |               |
|-----|-------------|----|----|----|----|---------------|
| 104 | p.Leu104Arg | 2  | -  | 1  | 1  | Deleterious   |
| 104 | p.Leu104Val | 1  | -  | -  | -  | Neutral       |
| 105 | p.Asp105Asn | 1  | -  | -  | -  | Neutral       |
| 106 | p.Val106Met | 4  | -  | -  | -  | Neutral       |
| 107 | p.Arg107Cys | 2  | -  | 2  | -  | Indeterminate |
| 107 | p.Arg107His | 2  | 1  | -  | -  | Neutral       |
| 108 | p.Asp108Ala | 1  | -  | -  | -  | Deleterious   |
| 108 | p.Asp108Gly | 6  | 1  | 1  | -  | Deleterious   |
| 108 | p.Asp108His | 15 | 1  | -  | 3  | Deleterious   |
| 108 | p.Asp108Asn | 20 | 5  | 1  | 5  | Neutral       |
| 108 | p.Asp108Val | 3  | 1  | -  | -  | Deleterious   |
| 108 | p.Asp108Tyr | 39 | 11 | 5  | 5  | Deleterious   |
| 109 | p.Ala109Pro | -  | -  | 1  | -  | Deleterious   |
| 109 | p.Ala109Thr | 2  | -  | -  | -  | Neutral       |
| 109 | p.Ala109Val | 1  | -  | -  | -  | Neutral       |
| 110 | p.Trp110Cys | 1  | -  | -  | -  | Neutral       |
| 110 | p.Trp110Arg | 1  | -  | -  | -  | Neutral       |
| 111 | p.Gly111Asp | 2  | 1  | -  | -  | Neutral       |
| 111 | p.Gly111Ser | 1  | -  | -  | -  | Neutral       |
| 111 | p.Gly111Val | 1  | -  | 1  | -  | Deleterious   |
| 112 | p.Arg112Cys | 3  | -  | 1  | -  | Indeterminate |
| 112 | p.Arg112His | 2  | 2  | 1  | -  | Neutral       |
| 112 | p.Arg112Pro | 2  | -  | -  | 1  | Deleterious   |
| 112 | p.Arg112ser | 2  | -  | -  | -  | Neutral       |
| 114 | p.Pro114Phe | 1  | -  | 1  | 1  | Deleterious   |
| 114 | p.Pro114His | 2  | -  | -  | -  | Deleterious   |
| 114 | p.Pro114Leu | 78 | 13 | 11 | 11 | Deleterious   |
| 114 | p.Pro114Arg | 2  | -  | -  | -  | Deleterious   |
| 114 | p.Pro114Ser | 4  | -  | -  | 1  | Indeterminate |
| 114 | p.Pro114Thr | 4  | 3  | -  | -  | Deleterious   |
| 115 | p.Val115Glu | 1  | -  | -  | -  | Indeterminate |
| 115 | p.Val115Leu | 4  | -  | -  | -  | Neutral       |
| 116 | p.Asp116Asn | -  | -  | 1  | -  | Neutral       |
| 116 | p.Asp116Tyr | 3  | -  | -  | 1  | Neutral       |
| 118 | p.Ala118Pro | 2  | 1  | -  | -  | Indeterminate |
| 118 | p.Ala118Thr | 1  | 1  | -  | -  | Neutral       |
| 118 | p.Ala118Val | 1  | -  | -  | -  | Indeterminate |
| 119 | p.Glu119Asp | 2  | 2  | -  | -  | Indeterminate |
| 119 | p.Glu119Lys | 2  | 1  | 2  | -  | Neutral       |
| 119 | p.Glu119Gln | 2  | 1  | -  | -  | Indeterminate |
| 120 | p.Glu120Ala | 1  | -  | -  | -  | Neutral       |
| 120 | p.Glu120Lys | 4  | -  | -  | 1  | Neutral       |
| 122 | p.Gly122Cys | 1  | -  | -  | 1  | Neutral       |
| 122 | p.Gly122Asp | 2  | -  | -  | -  | Neutral       |
| 122 | p.Gly122Ser | 2  | -  | -  | -  | Neutral       |
| 122 | p.Gly122Val | -  | -  | 1  | -  | Neutral       |
| 123 | p.His123Asn | 1  | 1  | -  | 1  | Indeterminate |
| 123 | p.His123Gln | 2  | -  | -  | -  | Neutral       |
| 124 | p.Arg124His | 6  | -  | -  | 2  | Neutral       |
| 124 | p.Arg124Cys | 1  | -  | 1  | -  | Neutral       |
| 125 | p.Asp125His | -  | -  | 3  | -  | Neutral       |
| 125 | p.Asp125Asn | 3  | 1  | -  | -  | Neutral       |
| 126 | p.Val126Ala | 1  | -  | -  | 1  | Neutral       |
| 126 | p.Val126Asp | 3  | 1  | 2  | -  | Deleterious   |
| 126 | p.Val126Phe | 3  | -  | -  | -  | Neutral       |
| 126 | p.Val126Gly | -  | 1  | -  | -  | Neutral       |
| 126 | p.Val126Ile | 3  | -  | -  | -  | Neutral       |
| 127 | p.Ala127Pro | 1  | -  | -  | -  | Deleterious   |
| 127 | p.Ala127Ser | 2  | -  | -  | 1  | Neutral       |
| 128 | p.Arg128Cys | -  | -  | -  | 1  | Neutral       |
| 128 | p.Arg128Leu | -  | -  | 1  | -  | Neutral       |
| 128 | p.Arg128Pro | -  | -  | 1  | -  | Deleterious   |
| 128 | p.Arg128Gln | 2  | 1  | -  | -  | Neutral       |

|     |             |    |   |   |   |               |
|-----|-------------|----|---|---|---|---------------|
| 128 | p.Arg128Trp | 5  | - | - | - | Neutral       |
| 129 | p.Tyr129Cys | 3  | - | - | 2 | Neutral       |
| 129 | p.Tyr129Phe | 1  | - | - | - | Neutral       |
| 129 | p.Tyr129His | 1  | - | - | - | Neutral       |
| 129 | p.Tyr129Asn | 1  | 1 | - | - | Indeterminate |
| 130 | p.Leu130Met | -  | - | 1 | - | Neutral       |
| 130 | p.Leu130Pro | 4  | 1 | 1 | - | Deleterious   |
| 130 | p.Leu130Gln | 8  | - | - | 2 | Indeterminate |
| 130 | p.Leu130Arg | 5  | - | 2 | - | Deleterious   |
| 131 | p.Arg131Cys | 4  | 1 | - | 1 | Deleterious   |
| 131 | p.Arg131His | 5  | 1 | - | - | Neutral       |
| 131 | p.Arg131Leu | 1  | - | - | - | Neutral       |
| 131 | p.Arg131Pro | 2  | - | - | 1 | Indeterminate |
| 132 | p.Ala132Pro | 2  | - | - | - | Neutral       |
| 132 | p.Ala132Val | -  | 1 | - | - | Neutral       |
| 133 | p.Ala133ser | -  | - | 1 | - | Neutral       |
| 133 | p.Ala133Thr | -  | 1 | - | - | Neutral       |
| 134 | p.Ala134Val | 1  | - | - | - | Neutral       |
| 135 | p.Gly135Ala | 1  | - | - | - | Neutral       |
| 135 | p.Gly135Glu | 3  | - | - | 1 | Indeterminate |
| 136 | p.Gly136Asp | 2  | - | - | - | Indeterminate |
| 136 | p.Gly136Arg | -  | - | 1 | - | Neutral       |
| 137 | p.Thr137Ala | 1  | - | - | - | Neutral       |
| 138 | p.Arg138Thr | 2  | - | - | 1 | Neutral       |
| 139 | p.Gly139Ser | -  | - | 2 | - | Neutral       |
| 140 | p.Ser140Cys | 1  | - | - | - | Neutral       |
| 140 | p.Ser140Asn | 1  | - | - | - | Neutral       |
| 142 | p.His142Asn | 1  | - | - | - | Neutral       |
| 142 | p.His142Gln | 1  | - | - | - | Neutral       |
| 142 | p.His142Tyr | 1  | - | - | - | Neutral       |
| 144 | p.Arg144His | 2  | - | - | 2 | Neutral       |
| 146 | p.Asp146Ala | 1  | - | - | - | Neutral       |
| 146 | p.Asp146Glu | 1  | - | - | - | Neutral       |
| 146 | p.Asp146Gly | -  | 1 | - | - | Neutral       |
| 146 | p.Asp146Asn | 1  | - | - | - | Neutral       |
| 148 | p.Ala148Gly | 1  | - | - | - | Neutral       |
| 148 | p.Ala148Thr | 10 | - | - | - | Neutral       |
| 148 | p.Ala148Val | 1  | 1 | - | - | Indeterminate |
| 149 | p.Glu149Lys | 1  | - | - | - | Neutral       |
| 150 | p.Gly150Ser | 1  | 1 | - | - | Neutral       |
| 150 | p.Gly150Val | 1  | - | - | - | Neutral       |
| 153 | p.Asp153Asn | 9  | - | 1 | 4 | Neutral       |
| 154 | p.Ile154Thr | 1  | - | - | - | Neutral       |
| 155 | p.Pro155Ser | 1  | - | - | - | Indeterminate |

COSMIC - Catalogue Of Somatic Mutations In Cancer; TCGA - The Cancer Genome Atlas; JHU - Johns Hopkins University ; MSKCC-IMPACT - Memorial Sloan Kettering-Integrated Mutation Profiling of Actionable Cancer Targets Clinical Sequencing Cohort.
