# Supplementary material
Source: PubMed Central journal article supplement (PMC11422873)
Supplement: media-10.pdf [file media-10.pdf]

|     |             |          |            |                          |      |             |       |         |             |                        |         |
|-----|-------------|----------|------------|--------------------------|------|-------------|-------|---------|-------------|------------------------|---------|
| 125 | p.Asp125Asn | c.373G>A | Missense   |                          | 0.62 | Neutral     | 2     | 1610302 | 1.242E-06   | Uncertain significance | 858988  |
| 125 | p.Asp125Glu | c.375T>A | Missense   |                          | 0.80 | Neutral     | 2     | 777462  | 2.57247E-06 | Uncertain significance | 1329079 |
| 125 | p.Asp125His | c.373G>C | Missense   | Functionally neutral     | 0.95 | Neutral     | 569   | 1610420 | 0.00035324  | Uncertain significance | 41577   |
| 126 | p.Val126Asp | c.377T>A | Missense   | Pathogenic               | 0.00 | Deleterious | 3     | 1458484 | 2.05693E-06 | Pathogenic             | 9420    |
| 126 | p.Val126Leu | c.376G>C | Missense   |                          | 1.00 | Neutral     | 1     | 1458368 | 6.86E-07    | Uncertain significance | 489868  |
| 126 | p.Val126Phe | c.376G>T | Missense   |                          | 0.75 | Neutral     | 1     | 1458368 | 6.86E-07    |                        |         |
| 126 | p.Val126Val | c.378C>T | Synonymous |                          | 0.48 | Neutral     | 1     | 1458494 | 6.86E-07    | Likely benign          | 1692141 |
| 126 | p.Val126Val | c.378C>G | Synonymous |                          | 0.48 | Neutral     | 1     | 1458494 | 6.86E-07    |                        |         |
| 127 | p.Ala127Pro | c.379G>C | Missense   | Functionally deleterious | 0.00 | Deleterious | 1     | 1458444 | 6.86E-07    | Uncertain significance | 571866  |
| 127 | p.Ala127Ser | c.379G>T | Missense   | Likely benign            | 0.23 | Neutral     | 1532  | 1610798 | 0.000951081 | Benign/Likely benign   | 41578   |
| 127 | p.Ala127Val | c.380C>T | Missense   |                          | 0.83 | Neutral     | 1     | 152238  | 6.56866E-06 | Uncertain significance | 2030143 |
| 128 | p.Arg128Gln | c.383G>A | Missense   |                          | 0.93 | Neutral     | 19    | 1610916 | 1.17945E-05 | Uncertain significance | 581636  |
| 128 | p.Arg128Pro | c.383G>C | Missense   |                          | 0.00 | Deleterious | 1     | 1458694 | 6.86E-07    | Uncertain significance | 483344  |
| 130 | p.Leu130Leu | c.388C>T | Synonymous |                          | 0.48 | Neutral     | 2     | 778188  | 2.57007E-06 | Uncertain significance | 491575  |
| 131 | p.Arg131Cys | c.391C>T | Missense   |                          | 0.00 | Deleterious | 1     | 1459134 | 6.85E-07    | Uncertain significance | 1350948 |
| 131 | p.Arg131His | c.392G>A | Missense   |                          | 0.64 | Neutral     | 2     | 1459184 | 1.37063E-06 | Uncertain significance | 620615  |
| 132 | p.Ala132Ala | c.396G>C | Synonymous |                          | 0.48 | Neutral     | 1     | 152250  | 6.56814E-06 | Likely benign          | 382703  |
| 132 | p.Ala132Ala | c.396G>T | Synonymous |                          | 0.48 | Neutral     | 1     | 626296  | 1.59669E-06 |                        |         |
| 132 | p.Ala132Val | c.395C>T | Missense   |                          | 0.05 | Neutral     | 5     | 1459290 | 3.42632E-06 | Uncertain significance | 630452  |
| 133 | p.Ala133Ala | c.399T>C | Synonymous |                          | 0.48 | Neutral     | 2     | 1459450 | 1.37038E-06 |                        |         |
| 134 | p.Ala134Ala | c.402G>A | Synonymous |                          | 0.57 | Neutral     | 1     | 1459422 | 6.85E-07    | Uncertain significance | 583214  |
| 134 | p.Ala134Ala | c.402G>T | Synonymous |                          | 0.57 | Neutral     | 9     | 1611668 | 5.58428E-06 | Likely benign          | 236989  |
| 134 | p.Ala134Pro | c.406G>C | Missense   |                          | 0.68 | Neutral     | 5     | 1611668 | 3.10238E-06 | Uncertain significance | 495536  |
| 134 | p.Ala134Val | c.401C>T | Missense   |                          | 0.93 | Neutral     | 3     | 626164  | 4.79108E-06 | Uncertain significance | 650117  |
| 135 | p.Gly135Glu | c.404G>A | Missense   |                          | 0.00 | Deleterious | 5     | 1611926 | 3.10188E-06 | Uncertain significance | 463504  |
| 135 | p.Gly135Gly | c.405G>A | Synonymous |                          | 0.48 | Neutral     | 306   | 1611984 | 0.00018928  | Benign/Likely benign   | 383182  |
| 135 | p.Gly135Val | c.404G>T | Missense   |                          | 0.37 | Neutral     | 1     | 1459674 | 6.85E-07    | Uncertain significance | 843913  |
| 136 | p.Gly136Ala | c.407G>C | Missense   |                          | 0.66 | Neutral     | 2     | 152212  | 1.31396E-05 | Uncertain significance | 483335  |
| 136 | p.Gly136Asp | c.407G>A | Missense   |                          | 0.00 | Deleterious | 5     | 626354  | 7.98271E-06 | Uncertain significance | 925925  |
| 136 | p.Gly136Ser | c.406G>A | Missense   |                          | 0.03 | Neutral     | 5     | 1612104 | 3.10154E-06 | Uncertain significance | 483342  |
| 137 | p.Thr137Pro | c.409A>C | Missense   |                          | 0.70 | Neutral     | 1     | 1459840 | 6.85E-07    |                        |         |
| 137 | p.Thr137Ser | c.410C>G | Missense   |                          | 0.77 | Neutral     | 1     | 626710  | 1.59563E-06 |                        |         |
| 138 | p.Arg138Arg | c.412A>G | Missense   |                          | 0.77 | Neutral     | 15    | 1612210 | 9.304E-06   | Uncertain significance | 233990  |
| 139 | p.Gly139Arg | c.415G>C | Missense   | Functionally neutral     | 0.33 | Neutral     | 27    | 1460010 | 1.8493E-05  | Uncertain significance | 216276  |
| 139 | p.Gly139Asp | c.416G>A | Missense   |                          | 0.01 | Deleterious | 9     | 1612280 | 5.58216E-06 | Uncertain significance | 491576  |
| 139 | p.Gly139Ser | c.415G>T | Missense   |                          | 0.05 | Neutral     | 4     | 1460010 | 2.73971E-06 | Uncertain significance | 141419  |
| 139 | p.Gly139Val | c.416G>T | Missense   |                          | 0.83 | Neutral     | 1     | 1459922 | 6.85E-07    | Uncertain significance | 2172999 |
| 140 | p.Ser140Ser | c.420T>C | Synonymous |                          | 0.48 | Neutral     | 2     | 1460096 | 1.36977E-06 | Likely benign          | 173845  |
| 141 | p.Asn141Asn | c.423C>T | Synonymous |                          | 0.48 | Neutral     | 1     | 1460072 | 6.85E-07    | Likely benign          | 924813  |
| 141 | p.Asn141Asp | c.421A>G | Missense   |                          | 0.87 | Neutral     | 1     | 152230  | 6.56901E-06 | Uncertain significance | 631362  |
| 142 | p.His142Arg | c.425A>G | Missense   |                          | 1.00 | Neutral     | 25    | 1612402 | 1.55048E-05 | Uncertain significance | 184564  |
| 142 | p.His142Gln | c.426T>G | Missense   |                          | 1.00 | Neutral     | 1     | 833110  | 1.20032E-06 | Uncertain significance | 246046  |
| 142 | p.His142Tyr | c.424C>T | Missense   |                          | 1.00 | Neutral     | 2     | 626994  | 3.18982E-06 | Uncertain significance | 824721  |
| 143 | p.Ala143Ala | c.429C>A | Synonymous |                          | 0.48 | Neutral     | 1     | 1460104 | 6.85E-07    | Likely benign          | 414090  |
| 143 | p.Ala143Gly | c.428C>G | Missense   |                          | 0.56 | Neutral     | 5     | 626918  | 7.97552E-06 | Uncertain significance | 630386  |
| 143 | p.Ala143Thr | c.427G>A | Missense   | Functionally neutral     | 0.72 | Neutral     | 16    | 1460132 | 1.09579E-05 | Uncertain significance | 245681  |
| 144 | p.Arg144Arg | c.432C>T | Synonymous |                          | 0.48 | Neutral     | 1     | 627030  | 1.59482E-06 |                        |         |
| 144 | p.Arg144Cys | c.430C>T | Missense   | Likely benign            | 0.98 | Neutral     | 763   | 1612398 | 0.000473208 | Benign/Likely benign   | 41579   |
| 144 | p.Arg144His | c.431G>A | Missense   |                          | 0.68 | Neutral     | 1     | 152236  | 6.56875E-06 | Uncertain significance | 406723  |
| 144 | p.Arg144Leu | c.431G>T | Missense   |                          | 0.89 | Neutral     | 10    | 1612274 | 6.20242E-06 | Uncertain significance | 463505  |
| 144 | p.Arg144Ser | c.430C>A | Missense   |                          | 0.75 | Neutral     | 1     | 152216  | 6.56961E-06 |                        |         |
| 145 | p.Ile145Met | c.435A>G | Missense   |                          | 0.12 | Neutral     | 1     | 627006  | 1.59488E-06 |                        |         |
| 145 | p.Ile145Thr | c.434T>C | Missense   |                          | 0.49 | Neutral     | 7     | 1460132 | 4.79409E-06 | Uncertain significance | 182420  |
| 145 | p.Ile145Val | c.433A>G | Missense   |                          | 0.21 | Neutral     | 1     | 1460158 | 6.85E-07    | Uncertain significance | 645545  |
| 146 | p.Asp146Asn | c.436G>A | Missense   |                          | 0.12 | Neutral     | 1     | 1460116 | 6.85E-07    | Uncertain significance | 578446  |
| 146 | p.Asp146Glu | c.438T>A | Missense   |                          | 0.61 | Neutral     | 1     | 833110  | 1.20032E-06 |                        |         |
| 146 | p.Asp146His | c.436G>C | Missense   |                          | 0.22 | Neutral     | 1     | 1460116 | 6.85E-07    | Uncertain significance | 824834  |
| 146 | p.Asp146Val | c.437A>T | Missense   |                          | 0.59 | Neutral     | 1     | 152216  | 6.56961E-06 | Uncertain significance | 928297  |
| 147 | p.Ala147Ala | c.441C>A | Synonymous |                          | 0.48 | Neutral     | 4     | 1459910 | 2.73989E-06 | Likely benign          | 391388  |
| 147 | p.Ala147Val | c.440C>T | Missense   |                          | 0.31 | Neutral     | 3     | 779052  | 3.85083E-06 | Uncertain significance | 406716  |
| 148 | p.Ala148Ala | c.444G>A | Synonymous |                          | 0.48 | Neutral     | 5     | 1459850 | 3.42801E-06 | Likely benign          | 923208  |
| 148 | p.Ala148Gly | c.443C>G | Missense   |                          | 0.38 | Neutral     | 1     | 1459882 | 6.85E-07    |                        |         |
| 148 | p.Ala148Thr | c.442G>A | Missense   | Likely benign            | 0.40 | Neutral     | 39384 | 1612214 | 0.02428519  | Benign                 | 41580   |
| 148 | p.Ala148Val | c.443C>T | Missense   |                          | 0.00 | Deleterious | 5     | 1612130 | 3.10149E-06 | Uncertain significance | 231700  |
| 150 | p.Gly150Asp | c.449G>A | Missense   |                          | 0.30 | Neutral     | 3     | 778834  | 3.85191E-06 | Uncertain significance | 483331  |
| 150 | p.Gly150Gly | c.450T>C | Synonymous |                          | 0.48 | Neutral     | 5     | 1459644 | 3.42549E-06 | Likely benign          | 630385  |
| 150 | p.Gly150Ser | c.448G>A | Missense   |                          | 0.40 | Neutral     | 1     | 626658  | 1.59577E-06 |                        |         |
| 151 | p.Pro151His | c.452C>A | Missense   |                          | 0.54 | Neutral     | 1     | 1459568 | 6.85E-07    |                        |         |
| 151 | p.Pro151Leu | c.452C>T | Missense   |                          | 0.08 | Neutral     | 4     | 1611804 | 2.48169E-06 | Uncertain significance | 406724  |
| 154 | p.Ile154Asn | c.461T>A | Missense   |                          | 0.06 | Neutral     | 6     | 628748  | 9.54277E-06 | Uncertain significance | 491579  |
| 156 | p.Asp156Ala | c.467A>A | Missense   |                          | 0.00 | Deleterious | 1     | 833022  | 1.20045E-06 |                        |         |
| 156 | p.Asp156Asn | c.466G>A | Missense   |                          | 0.11 | Neutral     | 1     | 1461724 | 6.84E-07    | Uncertain significance | 629192  |
| 156 | p.Asp156Asp | c.468T>C | Synonymous |                          | 0.48 | Neutral     | 4     | 780878  | 5.12244E-06 | Likely benign          | 215633  |
| 156 | p.Asp156Tyr | c.466G>T | Missense   |                          | 0.01 | Deleterious | 2     | 1461722 | 1.36825E-06 | Uncertain significance | 1171898 |
