# Supplementary material
Source: PubMed Central journal article supplement (PMC11422873)
Supplement: media-12.pdf [file media-12.pdf]

**Appendix 1-table 12. Codon optimized *CDKN2A* sequence.**

---

**Sequence**

---

ATGGAACCCGCCGCTGGCTCATCAATGGAACCCTCTGCAGATTGGCTCGCT  
ACCGCAGCCGCGCGAGGACGAGTGGAAGAAGTCCGAGCGCTCCTTGAAG  
CCGGTGCATTGCCAAATGCGCCTAACTCCTATGGACGCCGCCAATAACAAG  
TTATGATGATGGGATCTGCAAGGGTAGCTGAACTTCTCCTCTTGCATGGAG  
CAGAACCTAATTGTGCTGATCCAGCGACCCTGACTAGACCTGTACATGATG  
CCGCGCGTGAAGGGTTTCTCGATACCCTTGTCGTCCCTTCATCGAGCTGGTGC  
CCGCCTCGATGTCCGGGACGCATGGGGACGGCTCCCAGTCGATCTCGCAG  
AAGA ACTTGGGCACAGGGACGTAGCCAGATATTTGCGTGCAGCCGCCGGT  
GGTACGAGGGGATCAAATCACGCTAGAATCGACGCTGCCGAGGGCCCAA

---
