# Supplementary material
Source: PubMed Central journal article supplement (PMC11422873)
Supplement: media-13.pdf [file media-13.pdf]

Appendix 1-table 13. Sequences of primers used in study.

| Oligos                                                             | Sequences                                                                             |
|--------------------------------------------------------------------|---------------------------------------------------------------------------------------|
| <b>Primers used to generate variant CDKN2A expression plasmids</b> |                                                                                       |
| p.Ser7Gly_FWD                                                      | CGCCCGTGGCGGCTCAATGGAAC                                                               |
| p.Ser7Gly_REV                                                      | GGTTCATTAGTCTGGTATG                                                                   |
| p.Glu26Cys_FWD                                                     | AGGACGAGTGTGGAAATCCGAGCGCTCTTGAAGCCGG                                                 |
| p.Glu26Cys_REV                                                     | CGCCGGCTGCGGTATAG                                                                     |
| p.Glu26Pro_FWD                                                     | AGGACGAGTGTGGAAATCCGAGCGCTCTTGAAGCCGG                                                 |
| p.Glu26Pro_REV                                                     | CGCCGGCTGCGGTATAG                                                                     |
| p.Glu27Ala_FWD                                                     | ACGAGTGGAAAGCCGTCGAGCGCTCTTGAAGCCGG                                                   |
| p.Glu27Ala_REV                                                     | CCTCGGGCGCTGCGGTA                                                                     |
| p.Glu27Thr_FWD                                                     | ACGAGTGGAAAGCCGTCGAGCGCTCTTGAAGCCGG                                                   |
| p.Glu27Thr_REV                                                     | CCTCGGGCGCTGCGGTA                                                                     |
| p.Glu27His_FWD                                                     | ACGAGTGGAAAGCCGTCGAGCGCTCTTGAAGCCGG                                                   |
| p.Glu27His_REV                                                     | CCTCGGGCGCTGCGGTA                                                                     |
| p.Glu27Pro_FWD                                                     | ACGAGTGGAAAGCCGTCGAGCGCTCTTGAAGCCGG                                                   |
| p.Glu27Pro_REV                                                     | CCTCGGGCGCTGCGGTA                                                                     |
| p.Glu27Ile_FWD                                                     | ACGAGTGGAAAGCCGTCGAGCGCTCTTGAAGCCGG                                                   |
| p.Glu27Ile_REV                                                     | CCTCGGGCGCTGCGGTA                                                                     |
| p.Glu69Ala_FWD                                                     | GCATGGAGCAGCCCTAATTGTG                                                                |
| p.Glu69Ala_REV                                                     | AAGAGGAGAAGTTCACTAC                                                                   |
| p.Val95His_FWD                                                     | CGATACCCCTCAGCTTCACTCGAG                                                              |
| p.Val95His_REV                                                     | AGAAACCCCTCAGCCGG                                                                     |
| p.Ala100Gly_FWD                                                    | CGCCTCGATGTGCGGGACGCGATG                                                              |
| p.Ala100Gly_REV                                                    | GCACCCGCTCGATGAAAGACGAC                                                               |
| p.Arg103Lys_FWD                                                    | AGTGTGGTCCAAAGCTCGATGTCC                                                              |
| p.Arg103Lys_REV                                                    | CGATGAAAGGACGACAAGG                                                                   |
| p.Arg103Leu_FWD                                                    | AGCTGTGGCTGCTGCGATGTCC                                                                |
| p.Arg103Leu_REV                                                    | CGATGAAAGGACGACAAGG                                                                   |
| p.Arg103Gln_FWD                                                    | AGCTGTGGCTGCTGCGATGTCC                                                                |
| p.Arg103Gln_REV                                                    | CGATGAAAGGACGACAAGG                                                                   |
| p.Ala109Asp_FWD                                                    | TGTCGGGACGATGGGACGGCTC                                                                |
| p.Ala109Asp_REV                                                    | TCGAGGCGGGACCAAGCT                                                                    |
| p.Trp110Pro_FWD                                                    | CCGGGACGCCACCGGAGGCTCCCG                                                              |
| p.Trp110Pro_REV                                                    | ACAATGAGGGCGGCCA                                                                      |
| p.Val115Cys_FWD                                                    | ACGGCTCCCATGCGATCTCGAGAAGAAC                                                          |
| p.Val115Cys_REV                                                    | CCCCATGCTCCCGGACA                                                                     |
| p.Gly136Cys_FWD                                                    | AGCCCGGGTTGCACGAGGGGAT                                                                |
| p.Gly136Cys_REV                                                    | GCACGCAATATCTGGCTACG                                                                  |
| p.Pro151Gly_FWD                                                    | TGCGAGGGCGGACGACATAC                                                                  |
| p.Pro151Gly_REV                                                    | GGTCTGATCTAGCGGTGA                                                                    |
| p.Ile154Gly_FWD                                                    | CCCAAGCAGCGCCAGACTAAGAAATTCGACCC                                                      |
| p.Ile154Gly_REV                                                    | CCCTGGCAGCGTGGAT                                                                      |
| p.L32P_FWD                                                         | CGAGCGCTCCCAAGCCGGTG                                                                  |
| p.L32P_REV                                                         | ACTTCTTCCACTGCTCTCG                                                                   |
| p.G101W_FWD                                                        | TCATCGAGCTGGCCCGCTCG                                                                  |
| p.G101W_REV                                                        | AGGACGACAAGGGTATCGGAGAAC                                                              |
| p.V120P_FWD                                                        | GCACAGGGGACGACCGCAGATATTGG                                                            |
| p.V120P_REV                                                        | CCAAGTCTCTCGGAGATC                                                                    |
| p.L32L_FWD                                                         | CGAGCGCTCTGGAAGCCGGTG                                                                 |
| p.L32L_REV                                                         | ACTTCTTCCACTGCTCTCGGC                                                                 |
| p.G101G_FWD                                                        | TCATCGAGCTGGCCCGCTCG                                                                  |
| p.G101G_REV                                                        | AGGACGACAAGGGTATCGGAGAAC                                                              |
| p.V120V_FWD                                                        | GCACAGGGGACGTCGCGCAGATATT                                                             |
| p.V120V_REV                                                        | CCAAGTCTCTCGGAGATC                                                                    |
| <b>Primers used to generate CdfTag plasmids</b>                    |                                                                                       |
| Barcode 1_FWD                                                      | CTGCGGACGCGGCCACCAAC                                                                  |
| Barcode 1_REV                                                      | TACCACCTATCGTCACTGCTTTGTAATCCATGGTGGC                                                 |
| Barcode 2_FWD                                                      | CGATAAGGATCATAGCGGACGGGGC                                                             |
| Barcode 2_REV                                                      | TCATCTGCTTTGTAATCC                                                                    |
| Barcode 3_FWD                                                      | GAATGGCAGCGGCCACCAAC                                                                  |
| Barcode 3_REV                                                      | TGAATCTATCGTCACTGCTTTGTAATCCATGGTGGC                                                  |
| Barcode 4_FWD                                                      | GTACGGCAGCGGCCACCAAC                                                                  |
| Barcode 4_REV                                                      | TGCTCTTATCGTCACTGCTTTGTAATCCATGGTGGC                                                  |
| Barcode 5_FWD                                                      | GTACGGCAGCGGCCACCAAC                                                                  |
| Barcode 5_REV                                                      | ATATCTTATCGTCACTGCTTTGTAATCCATGGTGGC                                                  |
| Barcode 6_FWD                                                      | GTTCGGCAGCGGCCACCAAC                                                                  |
| Barcode 6_REV                                                      | TCAACCTTATCGTCACTGCTTTGTAATCCATGGTGGC                                                 |
| Barcode 7_FWD                                                      | ACATGGCAGCGGCCACCAAC                                                                  |
| Barcode 7_REV                                                      | TGATCTTATCGTCACTGCTTTGTAATCCATGGTGGC                                                  |
| Barcode 8_FWD                                                      | AGCTGGCAGCGGCCACCAAC                                                                  |
| Barcode 8_REV                                                      | TGCACCTTATCGTCACTGCTTTGTAATCCATGGTGGC                                                 |
| Barcode 9_FWD                                                      | GAGGATAAGGATGTAACGGGACGGG                                                             |
| Barcode 9_REV                                                      | ATCGCTTTGTAATCCATGGTGG                                                                |
| Barcode 10_FWD                                                     | GGTGGCAGCGGCCACCAAC                                                                   |
| Barcode 10_REV                                                     | CCTGGCTTATCGTCACTGCTTTGTAATCCATGGTGGC                                                 |
| Barcode 11_FWD                                                     | ACGATAAGATCAGATCGGACGGCG                                                              |
| Barcode 11_REV                                                     | CATCGTCTTGTAAATCCATG                                                                  |
| Barcode 12_FWD                                                     | CGATAAGGTGAGGAGCGGACGGGCG                                                             |
| Barcode 12_REV                                                     | TCATCTGCTTTGTAATCCATGG                                                                |
| Barcode 13_FWD                                                     | TATAGCAGCGGCCACCAAC                                                                   |
| Barcode 13_REV                                                     | CAACCCCTTATCGTCACTGCTTTGTAATCCATGGTGGC                                                |
| Barcode 14_FWD                                                     | GATAAAGTTCGATGCGGACGGG                                                                |
| Barcode 14_REV                                                     | GTACCTGCTTTGTAATCC                                                                    |
| Barcode 15_FWD                                                     | GTACGGCAGCGGCCACCAAC                                                                  |
| Barcode 15_REV                                                     | AGAACCTTATCGTCACTGCTTTGTAATCCATGGTGGC                                                 |
| Barcode 16_FWD                                                     | AGCCCGCAGCGGCCACCAAC                                                                  |
| Barcode 16_REV                                                     | ACCCCTTATCGTCACTGCTTTGTAATCCATGGTGGC                                                  |
| Barcode 17_FWD                                                     | TGATGGCAGCGGCCACCAAC                                                                  |
| Barcode 17_REV                                                     | AGCTACTTATCGTCACTGCTTTGTAATCCATGGTGGC                                                 |
| Barcode 18_FWD                                                     | CTCAGGACGCGGCCACCAAC                                                                  |
| Barcode 18_REV                                                     | CACTGCTTATCGTCACTGCTTTGTAATCCATGGTGGC                                                 |
| Barcode 19_FWD                                                     | CTGTGGCAGCGGCCACCAAC                                                                  |
| Barcode 19_REV                                                     | TCTGCTTATCGTCACTGCTTTGTAATCCATGGTGGC                                                  |
| Barcode 20_FWD                                                     | CAATGGCAGCGGCCACCAAC                                                                  |
| Barcode 20_REV                                                     | TATCCCTTATCGTCACTGCTTTGTAATCCATGGTGGC                                                 |
| <b>1st stage primers used to generate sequence libraries</b>       |                                                                                       |
| CellTag_FWD                                                        | GTA AAAACGACGGCAGGTTGCTGACGCGGGATCCG                                                  |
| CellTag_REV                                                        | CAGGAAACAGCTATGACTGTAGCCGTTGCTTTTCAA                                                  |
| p.AA1-53_FWD                                                       | GTA AAAACGACGGCAGGCTAGCGGTACAGTCC                                                     |
| p.AA1-53_REV                                                       | CAGGAAACAGCTATGACTACCTACCTTCAGATCC                                                    |
| p.AA54-110_FWD                                                     | GTA AAAACGACGGCAGCGCCCAATACAAGTTATG                                                   |
| p.AA54-110_REV                                                     | CAGGAAACAGCTATGACCCCAAGTTCTTCGCGAGA                                                   |
| p.AA111-156_FWD                                                    | GTA AAAACGACGGCAGGATACCCCTTGTCTCTTC                                                   |
| p.AA111-156_REV                                                    | CAGGAAACAGCTATGACTGCCATTTGTCTCGAGGT                                                   |
| <b>2nd stage primers used to generate sequence libraries</b>       |                                                                                       |
| FWD1                                                               | AATGATACGGGACCCAGGATCTACACTTTCCCTACACGACGCTCTTCCGATCTATGTA AAAACGACGGCCAG             |
| FWD2                                                               | AATGATACGGGACCCAGGATCTACACTTTCCCTACACGACGCTCTTCCGATCTATGTA AAAACGACGGCCAG             |
| FWD3                                                               | AATGATACGGGACCCAGGATCTACACTTTCCCTACACGACGCTCTTCCGATCTATGTA AAAACGACGGCCAG             |
| FWD4                                                               | AATGATACGGGACCCAGGATCTACACTTTCCCTACACGACGCTCTTCCGATCTATGTA AAAACGACGGCCAG             |
| FWD5                                                               | AATGATACGGGACCCAGGATCTACACTTTCCCTACACGACGCTCTTCCGATCTATGTA AAAACGACGGCCAG             |
| FWD6                                                               | AATGATACGGGACCCAGGATCTACACTTTCCCTACACGACGCTCTTCCGATCTATGTA AAAACGACGGCCAG             |
| FWD7                                                               | AATGATACGGGACCCAGGATCTACACTTTCCCTACACGACGCTCTTCCGATCTATGTA AAAACGACGGCCAG             |
| FWD8                                                               | AATGATACGGGACCCAGGATCTACACTTTCCCTACACGACGCTCTTCCGATCTATGTA AAAACGACGGCCAG             |
| REV1                                                               | CAAGCAGAAGACGGCATAACGAGATGACTGGATTGACTGGAGTTACAGACGTGTGCTCTCCGATCTATCAGGAAACAGCTATGAC |
| REV2                                                               | CAAGCAGAAGACGGCATAACGAGATGACTGGATTGACTGGAGTTACAGACGTGTGCTCTCCGATCTATCAGGAAACAGCTATGAC |
| REV3                                                               | CAAGCAGAAGACGGCATAACGAGATGACTGGATTGACTGGAGTTACAGACGTGTGCTCTCCGATCTATCAGGAAACAGCTATGAC |
| REV4                                                               | CAAGCAGAAGACGGCATAACGAGATGACTGGATTGACTGGAGTTACAGACGTGTGCTCTCCGATCTATCAGGAAACAGCTATGAC |
| REV5                                                               | CAAGCAGAAGACGGCATAACGAGATGACTGGATTGACTGGAGTTACAGACGTGTGCTCTCCGATCTATCAGGAAACAGCTATGAC |
| REV6                                                               | CAAGCAGAAGACGGCATAACGAGATGACTGGATTGACTGGAGTTACAGACGTGTGCTCTCCGATCTATCAGGAAACAGCTATGAC |
| REV7                                                               | CAAGCAGAAGACGGCATAACGAGATGACTGGATTGACTGGAGTTACAGACGTGTGCTCTCCGATCTATCAGGAAACAGCTATGAC |
| REV8                                                               | CAAGCAGAAGACGGCATAACGAGATGACTGGATTGACTGGAGTTACAGACGTGTGCTCTCCGATCTATCAGGAAACAGCTATGAC |
| REV9                                                               | CAAGCAGAAGACGGCATAACGAGATGACTGGATTGACTGGAGTTACAGACGTGTGCTCTCCGATCTATCAGGAAACAGCTATGAC |
| REV10                                                              | CAAGCAGAAGACGGCATAACGAGATGACTGGATTGACTGGAGTTACAGACGTGTGCTCTCCGATCTATCAGGAAACAGCTATGAC |
| REV11                                                              | CAAGCAGAAGACGGCATAACGAGATGACTGGATTGACTGGAGTTACAGACGTGTGCTCTCCGATCTATCAGGAAACAGCTATGAC |
| REV12                                                              | CAAGCAGAAGACGGCATAACGAGATGACTGGATTGACTGGAGTTACAGACGTGTGCTCTCCGATCTATCAGGAAACAGCTATGAC |
| REV13                                                              | CAAGCAGAAGACGGCATAACGAGATGACTGGATTGACTGGAGTTACAGACGTGTGCTCTCCGATCTATCAGGAAACAGCTATGAC |
| REV14                                                              | CAAGCAGAAGACGGCATAACGAGATGACTGGATTGACTGGAGTTACAGACGTGTGCTCTCCGATCTATCAGGAAACAGCTATGAC |
| REV15                                                              | CAAGCAGAAGACGGCATAACGAGATGACTGGATTGACTGGAGTTACAGACGTGTGCTCTCCGATCTATCAGGAAACAGCTATGAC |
| REV16                                                              | CAAGCAGAAGACGGCATAACGAGATGACTGGATTGACTGGAGTTACAGACGTGTGCTCTCCGATCTATCAGGAAACAGCTATGAC |

FWD - forward primer; REV - reverse primer.
