# Supplementary material
Source: PubMed Central journal article supplement (PMC11422873)

**Figure 1-figure supplement 1**

**A**

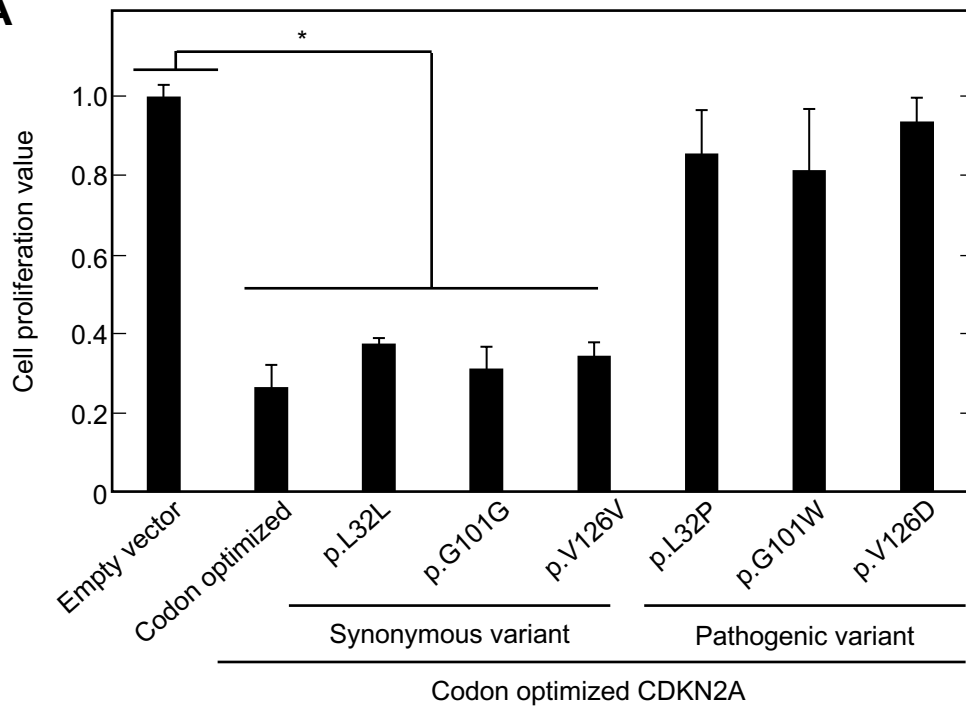

**B**

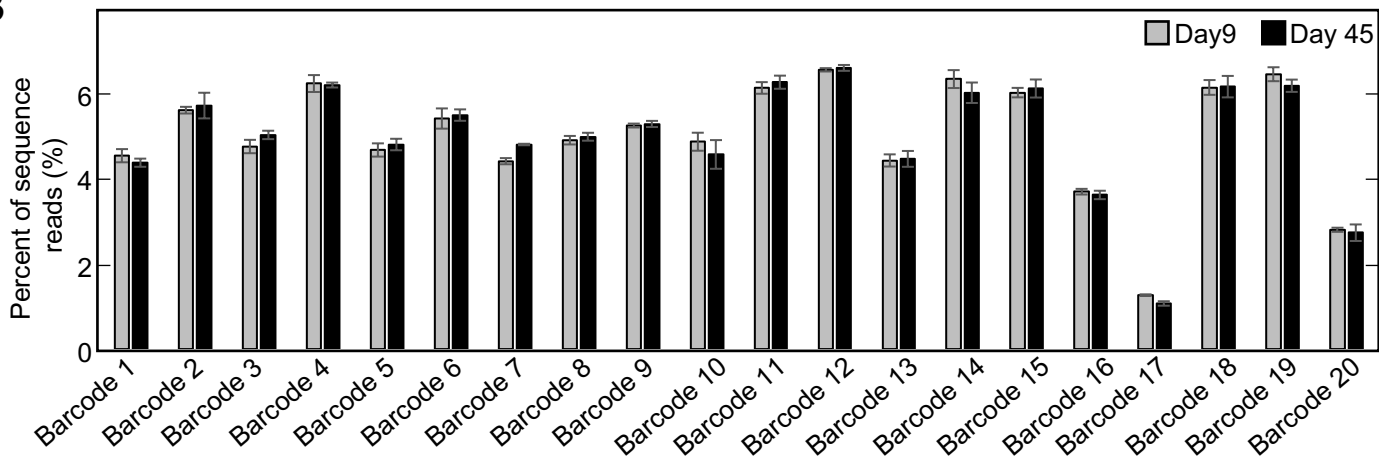

Supplement: media-14.pdf [file media-14.pdf]
