# Supplementary material
Source: PubMed Central journal article supplement (PMC11422873)

# Figure 1-figure supplement 2

**A**

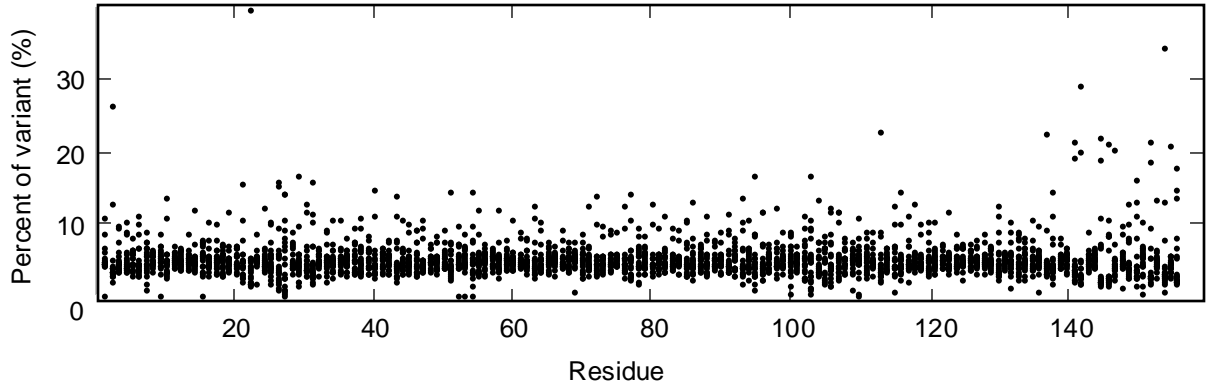

**B**

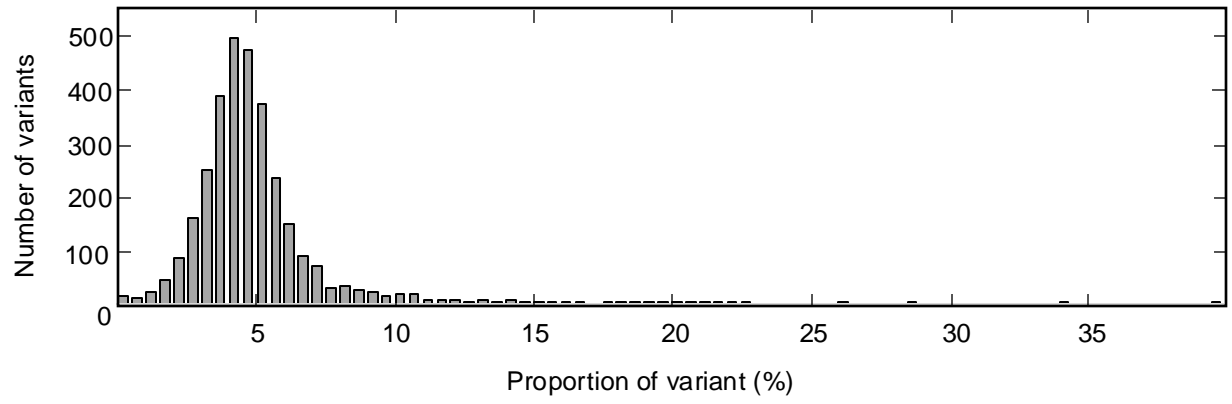

**C**

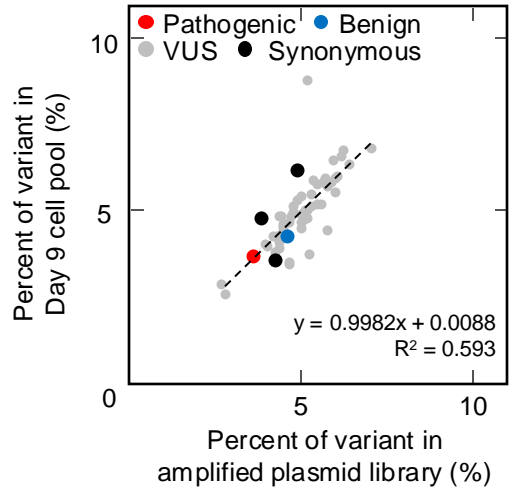

**D**

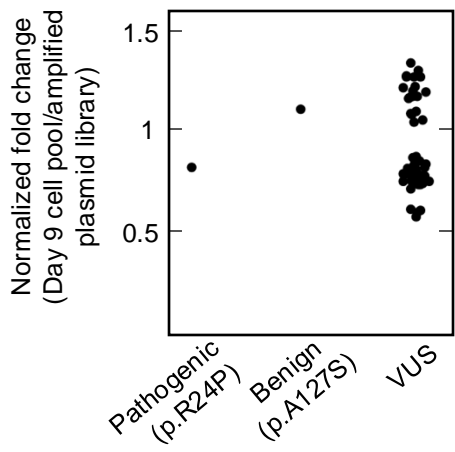

Supplement: media-15.pdf [file media-15.pdf]
