# Supplementary material
Source: PubMed Central journal article supplement (PMC11422873)

# Figure 2-figure supplement 1

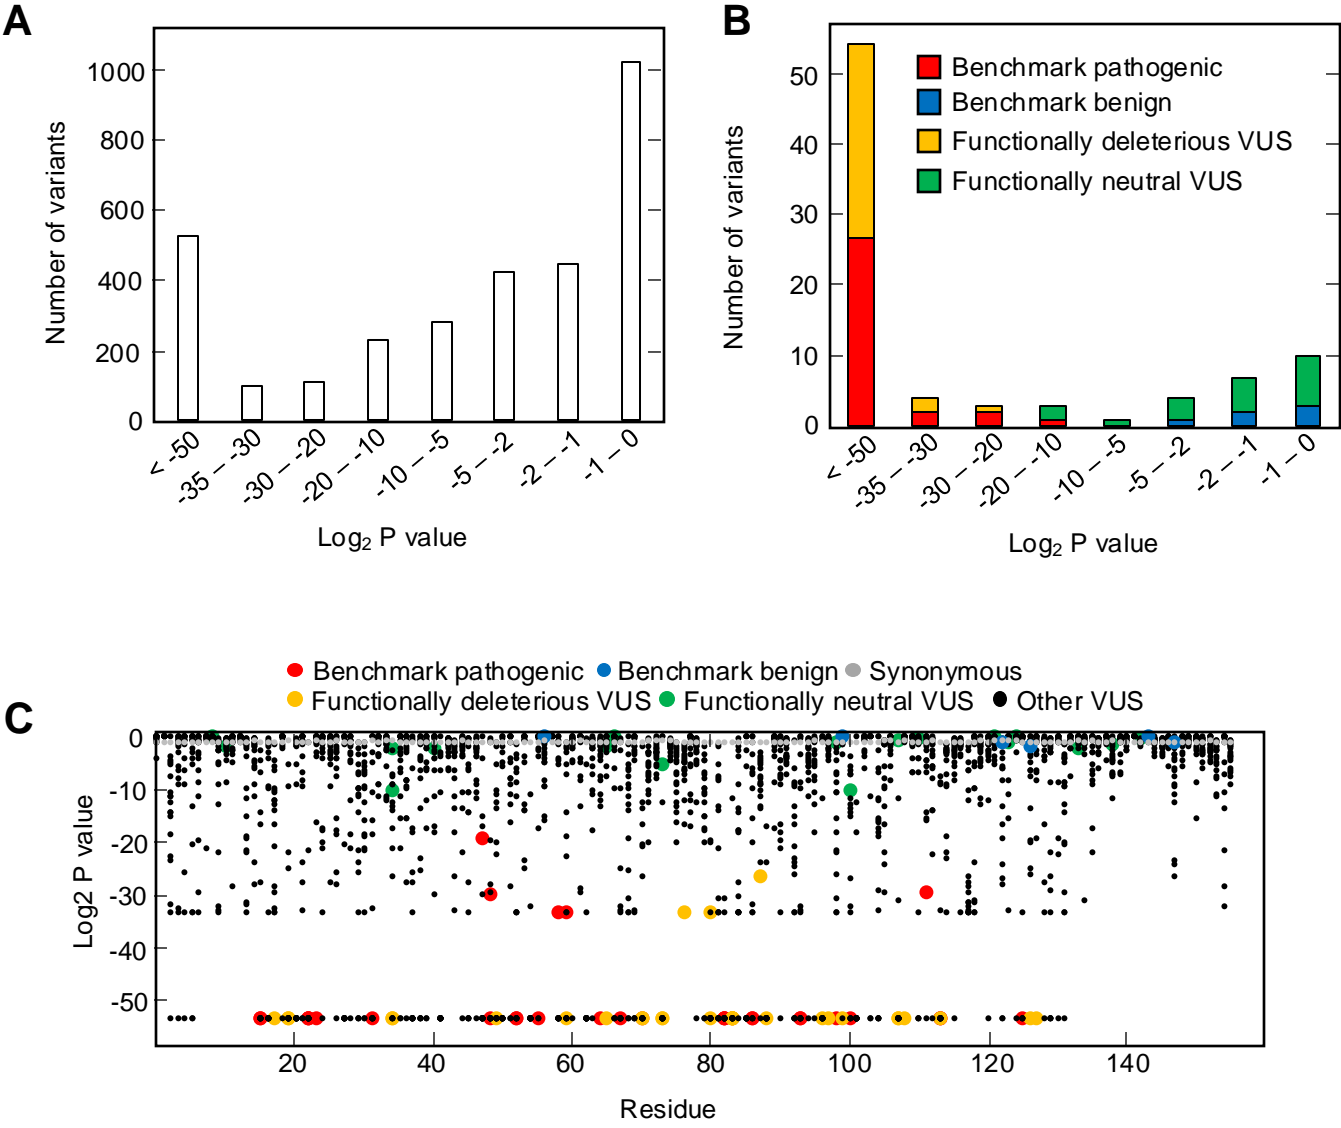

Supplement: media-16.pdf [file media-16.pdf]
