# Supplementary material
Source: PubMed Central journal article supplement (PMC11422873)

# Figure 2-figure supplement 5

**A**

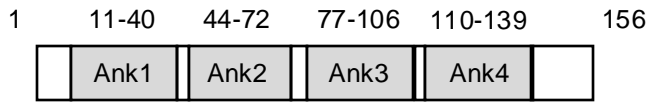

**B**

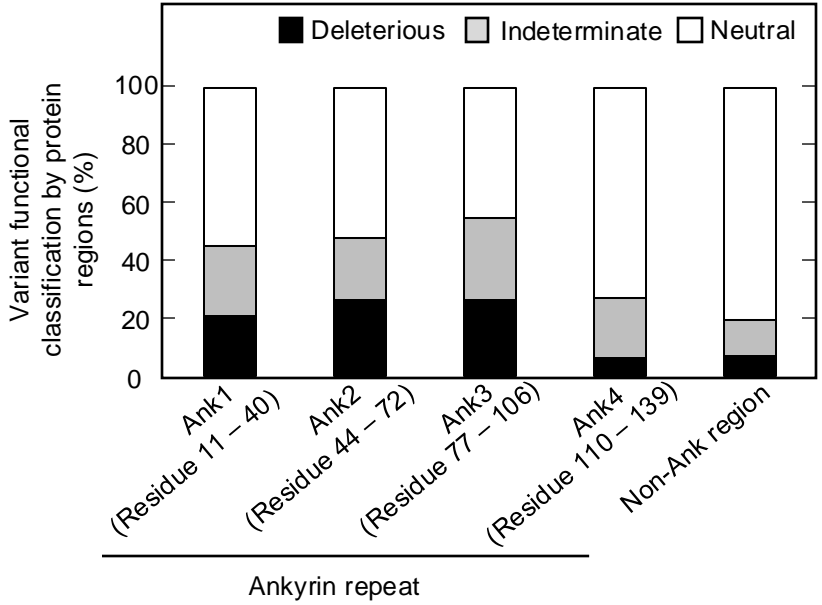

**C**

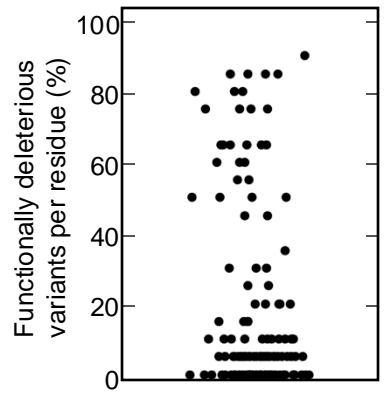

Supplement: media-20.pdf [file media-20.pdf]
