# Supplementary material
Source: PubMed Central journal article supplement (PMC11422873)

# Figure 3-figure supplement 1

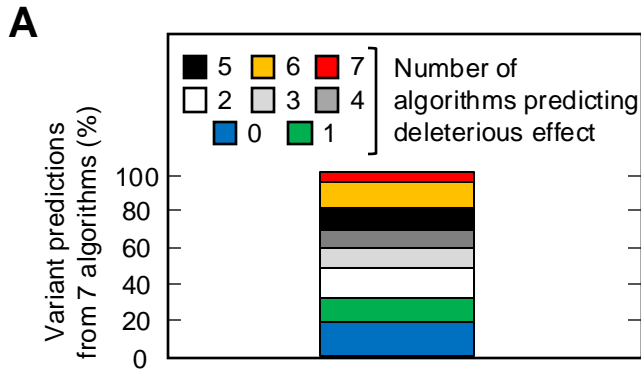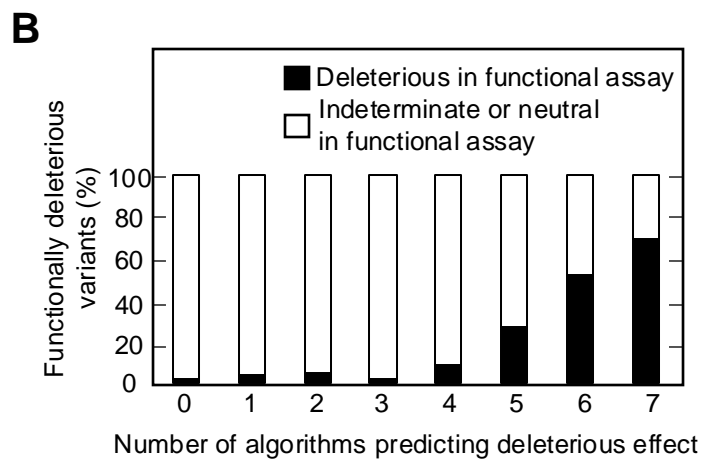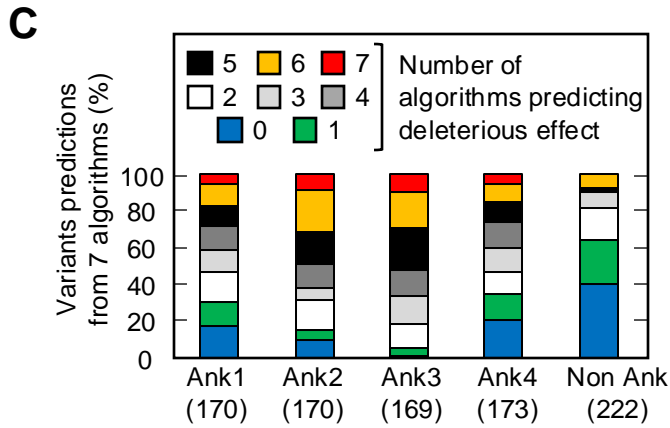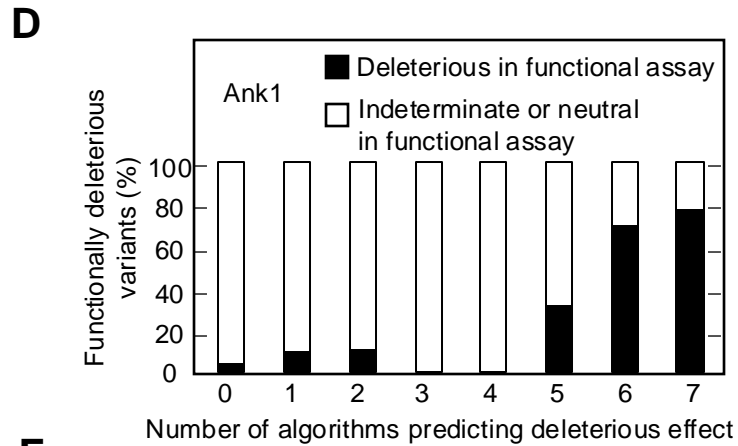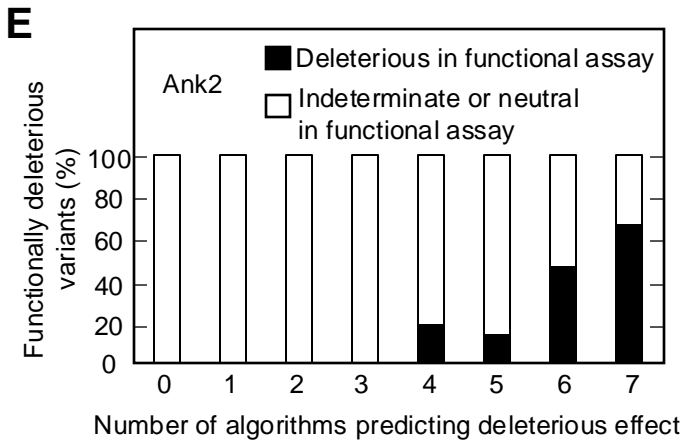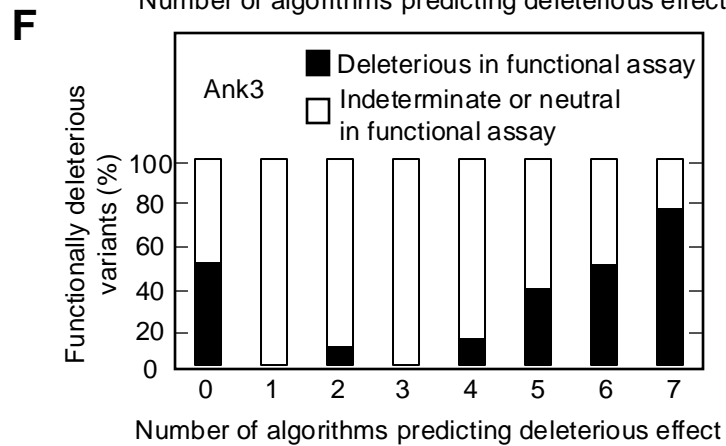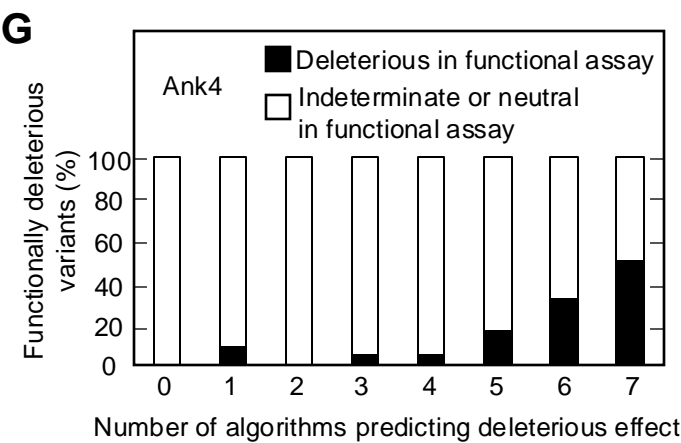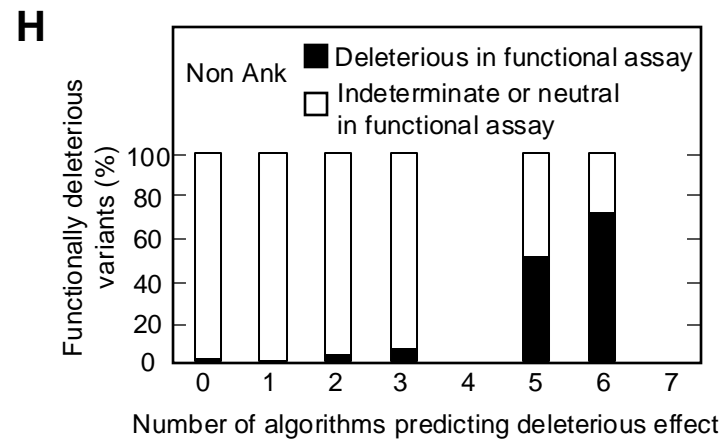

Supplement: media-21.pdf [file media-21.pdf]
