# Supplementary material
Source: PubMed Central journal article supplement (PMC11422873)

# Figure 3-figure supplement 2

**A**

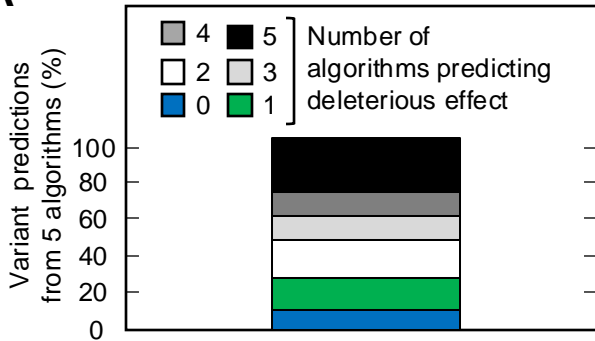

**B**

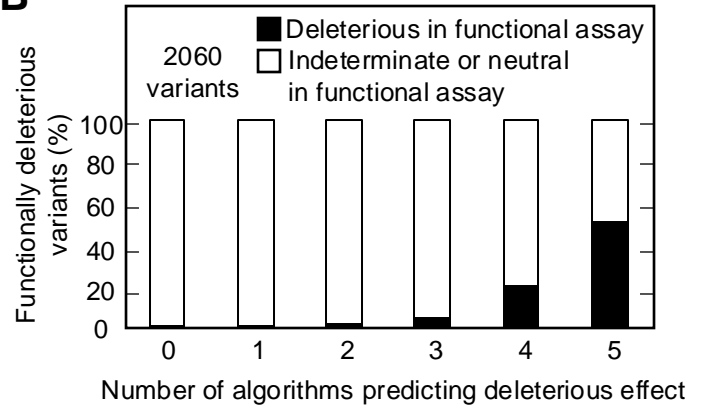

**C**

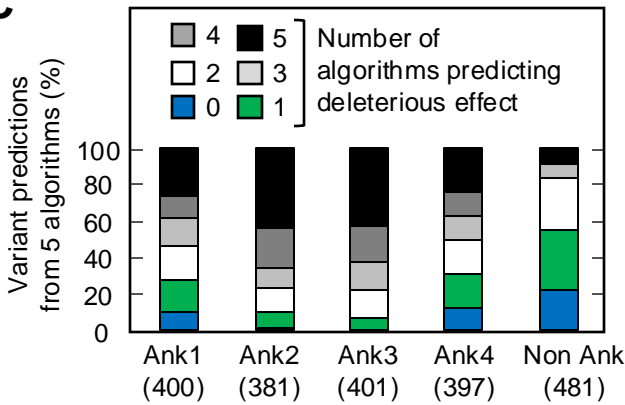

**D**

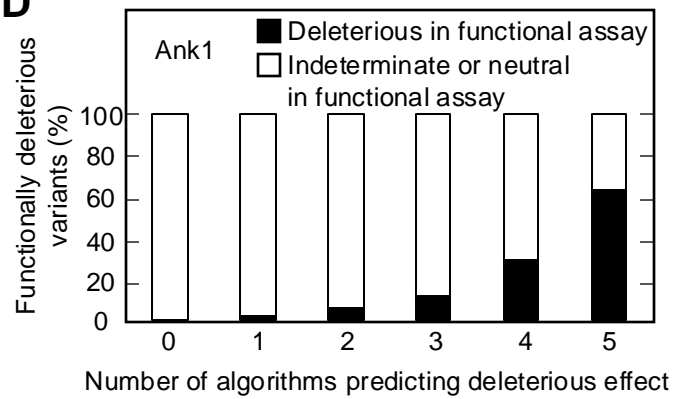

**E**

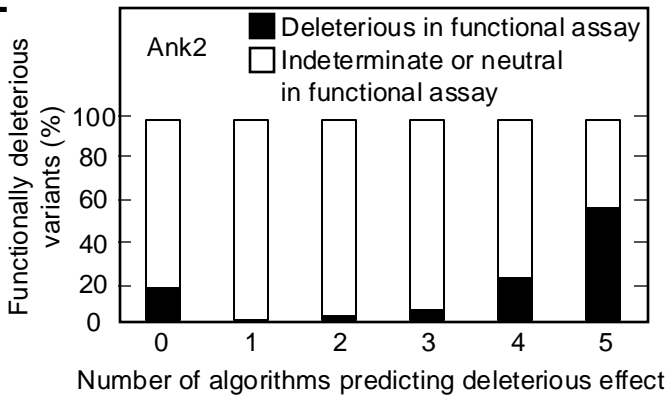

**F**

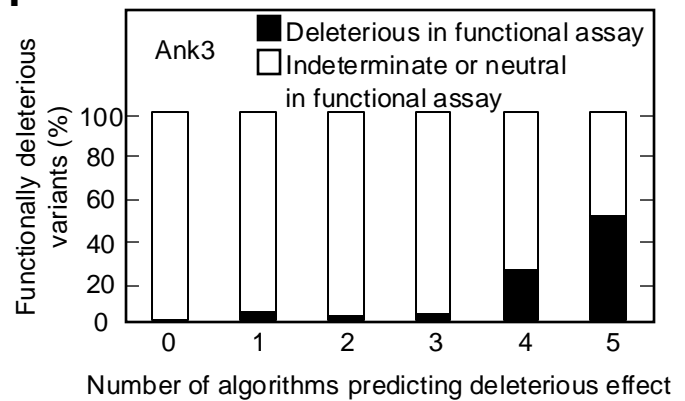

**G**

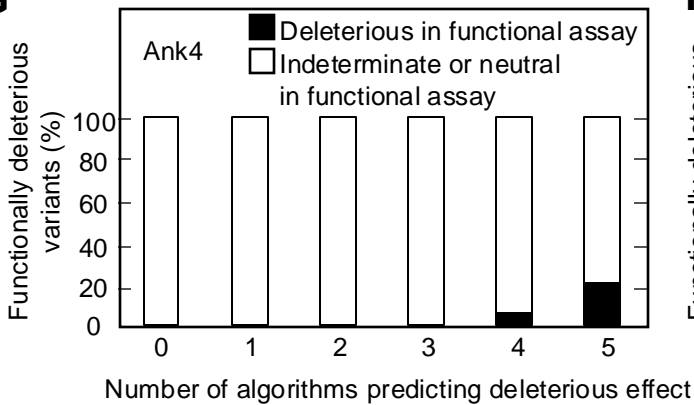

**H**

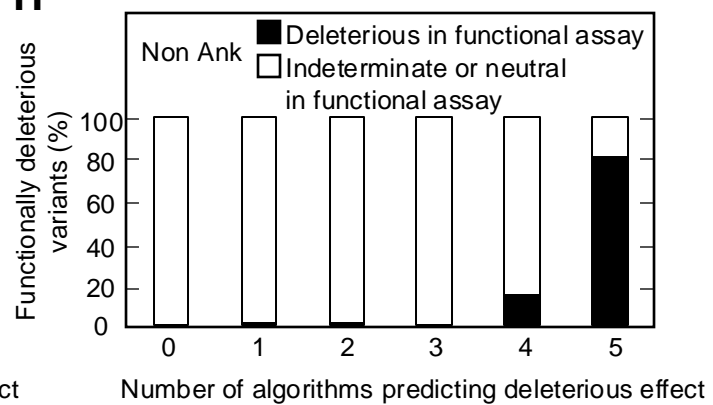

Supplement: media-22.pdf [file media-22.pdf]
