# Supplementary material
Source: PubMed Central journal article supplement (PMC11422873)

# Figure 4-figure supplement 1

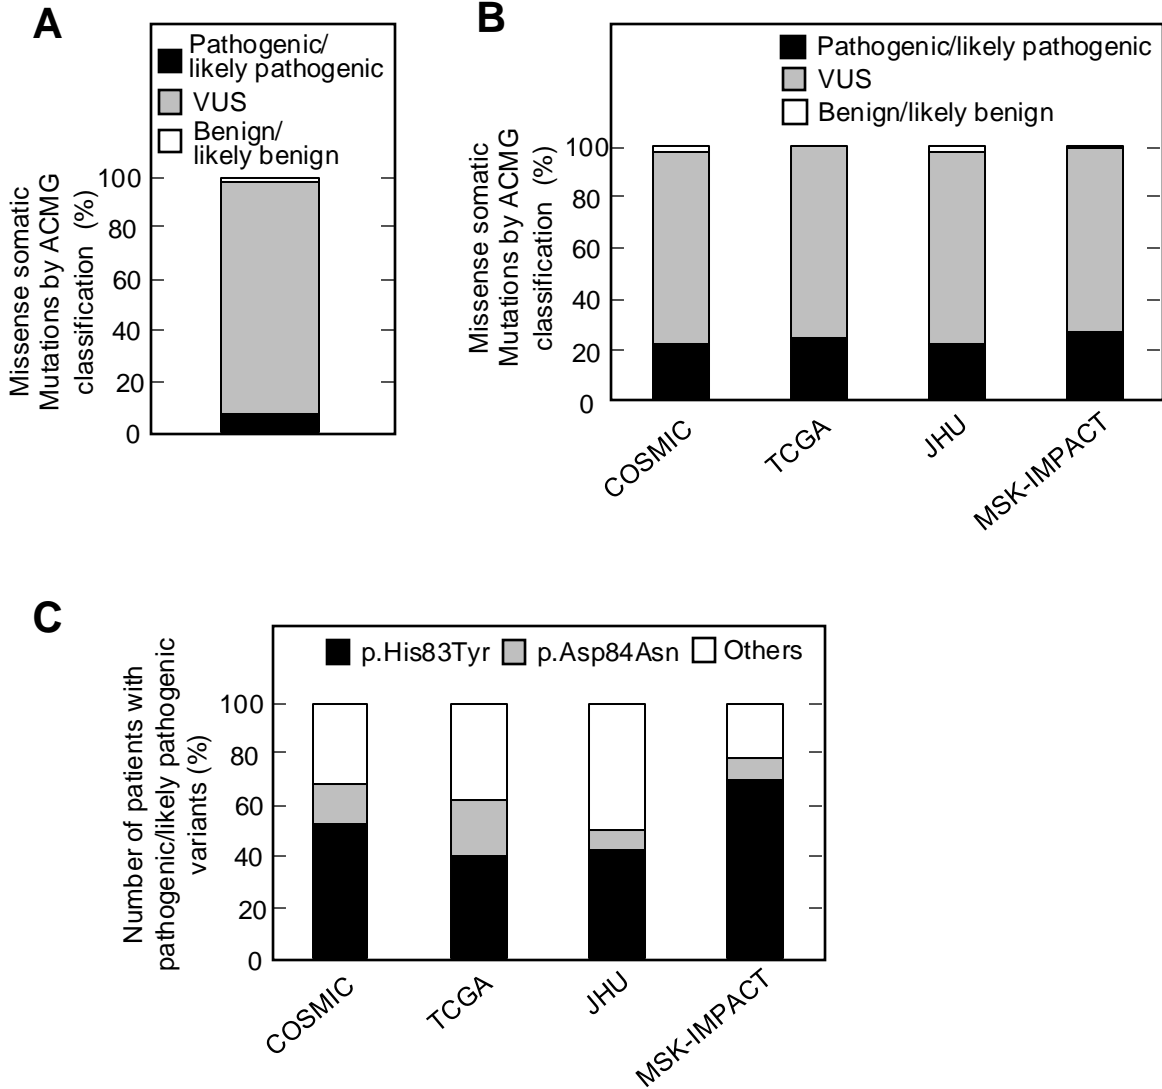

Supplement: media-23.pdf [file media-23.pdf]
