# Supplementary material
Source: PubMed Central journal article supplement (PMC11422873)

# Figure 4-figure supplement 2

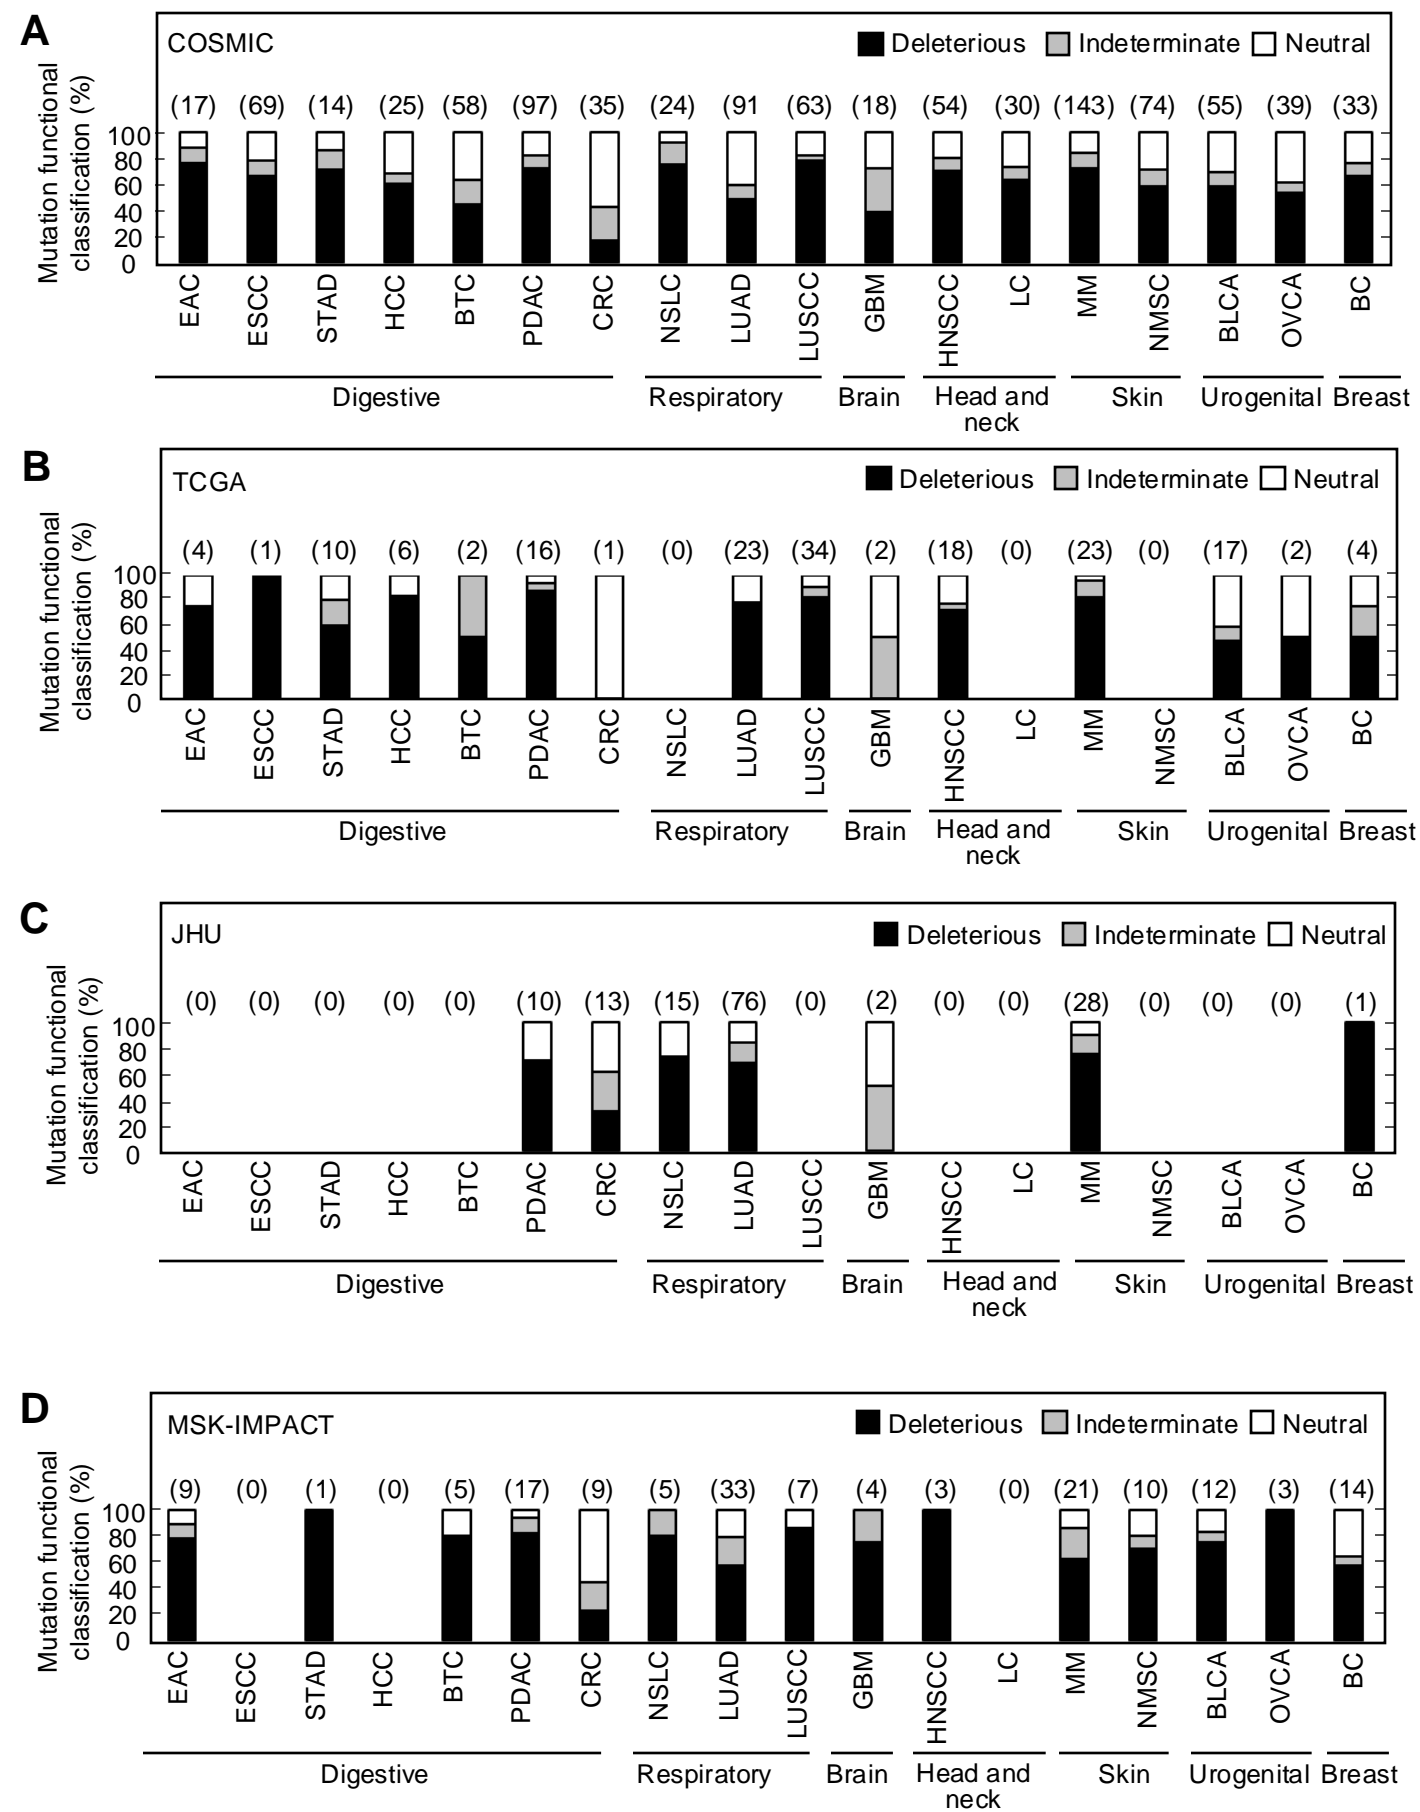

Supplement: media-24.pdf [file media-24.pdf]
