# Supplementary material
Source: PubMed Central journal article supplement (PMC11422873)

# Figure 2-figure supplement 3

**A**

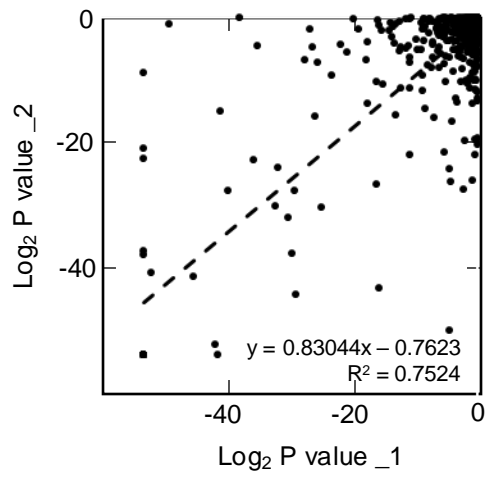

**B**

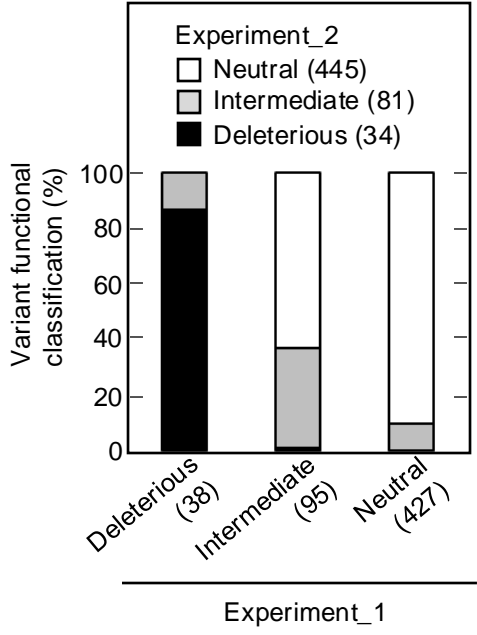

Supplement: media-18.pdf [file media-18.pdf]
